# Supplementary material for: Antagonism between ambient ozone increase and urbanization-oriented population migration on Chinese cardiopulmonary mortality
Source: PubMed Central journal article supplement — Innovation (Camb). 2023 Sep 20;4(6):100517. doi: 10.1016/j.xinn.2023.100517 (PMC10562756; doi:10.1016/j.xinn.2023.100517), 2023-09-20
Supplement: mmc1.pdf [file mmc1.pdf]

**The Innovation, Volume 4**

**Supplemental Information**

**Antagonism between ambient ozone increase and urbanization-oriented population migration on Chinese cardiopulmonary mortality**

**Haitong Zhe Sun, Junchao Zhao, Xiang Liu, Minghao Qiu, Huizhong Shen, Serge Guillas, Chiara Giorio, Zosia Staniaszek, Pei Yu, Michelle W.L. Wan, Man Mei Chim, Kim Robin van Daalen, Yilin Li, Zhenze Liu, Mingtao Xia, Shengxian Ke, Haifan Zhao, Haikun Wang, Kebin He, Huan Liu, Yuming Guo, and Alexander T. Archibald**

## SUPPLEMENTARY MATERIALS

### Antagonism between ambient ozone increasing and urbanization-oriented population migration on Chinese cardiopulmonary mortality

Haitong Zhe Sun<sup>1,2,3,†</sup>, Junchao Zhao<sup>4,†</sup>, Xiang Liu<sup>5</sup>, Minghao Qiu<sup>6</sup>, Huizhong Shen<sup>7</sup>, Serge Guillas<sup>8,9</sup>, Chiara Giorio<sup>1</sup>, Zosia Stanciaszek<sup>1</sup>, Pei Yu<sup>10</sup>, Michelle W.L. Wan<sup>1</sup>, Man Mei Chim<sup>1</sup>, Kim Robin van Daalen<sup>11,12,13</sup>, Yilin Li<sup>1</sup>, Zhenze Liu<sup>14</sup>, Mingtao Xia<sup>15</sup>, Shengxian Ke<sup>16</sup>, Haifan Zhao<sup>17</sup>, Haikun Wang<sup>5</sup>, Kebin He<sup>4</sup>, Huan Liu<sup>4\*</sup>, Yuming Guo<sup>10\*</sup>, and Alexander T. Archibald<sup>1,18\*</sup>

<sup>1</sup> Yusuf Hamied Department of Chemistry, University of Cambridge, Cambridge CB2 1EW, UK

<sup>2</sup> Department of Earth Sciences, University of Cambridge, Cambridge CB2 3EQ, UK

<sup>3</sup> Department of Environmental Health and Engineering, Johns Hopkins Bloomberg School of Public Health, Baltimore, MD 21205, USA

<sup>4</sup> State Key Joint Laboratory of ESPC, State Environmental Protection Key Laboratory of Sources and Control of Air Pollution Complex, School of Environment, Tsinghua University, Beijing 100084, China

<sup>5</sup> School of Atmospheric Sciences, Nanjing University, Nanjing 210023, China

<sup>6</sup> Department of Earth System Science, Stanford University, Stanford, CA 94305, USA

<sup>7</sup> School of Environmental Science and Engineering, Southern University of Science and Technology, Shenzhen 518055, China

<sup>8</sup> Department of Statistical Science, University College London, London WC1E 6BT, UK

<sup>9</sup> The Alan Turing Institute, London NW1 2DB, UK

<sup>10</sup> School of Public Health and Preventive Medicine, Monash University, Melbourne, VIC 3004, Australia

<sup>11</sup> British Heart Foundation Cardiovascular Epidemiology Unit, Department of Public Health and Primary Care, University of Cambridge, Cambridge CB1 8RN, UK

<sup>12</sup> Heart and Lung Research Institute, University of Cambridge, Cambridge CB2 0BD, UK

<sup>13</sup> Barcelona Supercomputing Center, Department of Earth Sciences, Barcelona 08034, Spain

<sup>14</sup> School of Environmental Science and Engineering, Nanjing University of Information Science and Technology, Nanjing 210044, China

<sup>15</sup> Department of Mathematics, University of California, Los Angeles, California 90095, USA

<sup>16</sup> State Key Laboratory of New Ceramics and Fine Processing, Key Laboratory of Advanced Materials of Ministry of Education, School of Materials Science and Engineering, Tsinghua University, Beijing, 100084, China

<sup>17</sup> Department of Engineering, University of Cambridge, Cambridge CB2 1PZ, UK

<sup>18</sup> National Centre for Atmospheric Science, Cambridge CB2 1EW, UK

<sup>†</sup>HZS and JZ contributed equally.

\*Correspondence to: Alexander T. Archibald, Yuming Guo, and Huan Liu.

*56 pages with 8 methodological notes, 17 tables, 20 figures, and 2 sections of listed contents for Supplementary Materials*

*Updated on 27 September 2023*

## CONTENTS

### Supplementary Methods

|                                                                             |   |
|-----------------------------------------------------------------------------|---|
| Method S1   Multi-model Fusion and Downscaling.....                         | 2 |
| Method S2   Phased Data Fusion .....                                        | 2 |
| Method S3   Detailed specification of Chinese administrative divisions..... | 3 |
| Method S4   Identification of mortality causes .....                        | 4 |
| Method S5   Construction of exposure-response curve .....                   | 4 |
| Method S6   Construction procedures of gridded population dataset .....     | 5 |
| Method S7   Sensitivity analyses.....                                       | 6 |
| Method S8   Cross-validation for spatiotemporal generalizability .....      | 8 |

### Supplementary Tables

|                                                                                                                                                                                               |    |
|-----------------------------------------------------------------------------------------------------------------------------------------------------------------------------------------------|----|
| Table S1   Province-level average of ambient ozone concentrations in 1990 and 2019.....                                                                                                       | 9  |
| Table S2   Regional and nationwide 1990 mortality metrics associated with ozone exposure. ....                                                                                                | 10 |
| Table S3   Historical 30-year regional and nationwide ozone-associated mortality trends. ....                                                                                                 | 11 |
| Table S4   30-year multi-cause cross-sectional baseline mortality rates of Chinese population.....                                                                                            | 12 |
| Table S5   Associations between rural-urban ambient ozone difference and land cover features.....                                                                                             | 13 |
| Table S6   Performance evaluations of phased data fusion with urban-rural distinguishment. ....                                                                                               | 14 |
| Table S7   Evaluation of spatial and temporal extrapolation accuracy by space-time Bayesian neural network downscaler with urban-rural differentiation.....                                   | 15 |
| Table S8   Quality assessment tool for observational cohort and cross-sectional studies. ....                                                                                                 | 16 |
| Table S9   Quality assessment of 29 included cohort studies for meta-analysis. ....                                                                                                           | 17 |
| Table S10   GRADE assessment for evidence of ozone-associated mortality risks of NCDs. ....                                                                                                   | 18 |
| Table S11   GRADE assessment for evidence of ozone-associated mortality risks of CRDs.....                                                                                                    | 19 |
| Table S12   GRADE assessment for evidence of ozone-associated mortality risks of COPD. ....                                                                                                   | 20 |
| Table S13   GRADE assessment for evidence of ozone-associated mortality risks of CVDs. ....                                                                                                   | 21 |
| Table S14   GRADE assessment for evidence of ozone-associated mortality risks of IHD.....                                                                                                     | 22 |
| Table S15   Statistically resampled distributions of ozone exposure levels for each study.....                                                                                                | 23 |
| Table S16   Evaluations of accuracies of deep-learning-based data assimilation with (ScA) and without (ScB) satellite-based remote-sensing measurements and chemical reanalysis outputs. .... | 24 |
| Table S17   Multi-scenario sensitivity analysis. ....                                                                                                                                         | 25 |

### Supplementary Figures

|                                                                                                                                                                                                     |    |
|-----------------------------------------------------------------------------------------------------------------------------------------------------------------------------------------------------|----|
| Figure S1   Mapping of 7 Chinese administrative divisions and 4 megalopolises.....                                                                                                                  | 26 |
| Figure S2   Nationwide and regional 30-year longitudinal trends of ambient ozone exposure.....                                                                                                      | 27 |
| Figure S3   Multi-study pooled mortality RR of NCDs associated with long-term ozone exposure. ....                                                                                                  | 28 |
| Figure S4   Multi-study pooled mortality RR of CRDs associated with ozone exposure. ....                                                                                                            | 29 |
| Figure S5   Multi-study pooled mortality RR of COPD associated with ozone exposure.....                                                                                                             | 30 |
| Figure S6   Multi-study pooled mortality RR of CVDs associated with ozone exposure.....                                                                                                             | 31 |
| Figure S7   Multi-study pooled mortality RR of IHD and CHF associated with ozone exposure. ....                                                                                                     | 32 |
| Figure S8   Examination of publication biases by trim-and-fill method. ....                                                                                                                         | 33 |
| Figure S9   Multi-study pooled ozone-associated RR curves of multi-cause mortality. ....                                                                                                            | 34 |
| Figure S10   30-year trend of hierarchical multi-cause mortality fractions.....                                                                                                                     | 35 |
| Figure S11   Gridded mapping of urban and rural cardiopulmonary premature deaths in 2019.....                                                                                                       | 36 |
| Figure S12   Changes in population-weighted ozone exposure comparing 1990 with 2019.....                                                                                                            | 37 |
| Figure S13   Schematic diagram of (a) classical high-resolution downscaling and (b) urban-rural differentiated stacked downscaling .....                                                            | 38 |
| Figure S14   Schematic diagram of Bayesian neural network multi-model fuser and downscaler.....                                                                                                     | 39 |
| Figure S15   Extrapolation validations on Chinese <i>in situ</i> observations with (a) urban, (b) rural, and (c) suburban differentiation by metric of monthly average of daily 8-hour maximum..... | 40 |
| Figure S16   Schematic diagram of urban-rural stacked gridded population upscaling.....                                                                                                             | 41 |
| Figure S17   Flowchart of gridded population dataset construction and calibration. ....                                                                                                             | 42 |
| Figure S18   Schematic diagram of cross-sectional population migration at cell-level definition. ....                                                                                               | 43 |
| Figure S19   Schematic diagram of cell-level population exposure assignment in stacked context.....                                                                                                 | 44 |
| Figure S20   External ozone prediction validations with literature reported observations.....                                                                                                       | 45 |

### Supplementary Contents

|                                                                                                  |    |
|--------------------------------------------------------------------------------------------------|----|
| Content S1   Population density of “suburban”-labelled CNEMC observation stations in 2019. ....  | 46 |
| Content S2   Literature-based external validations of urban-rural ambient ozone predictions..... | 48 |

## SUPPLEMENTARY METHODS

### Method S1 | Multi-model Fusion and Downscaling

The initial version of ambient O<sub>3</sub> concentration dataset developed by space-time Bayesian neural network downscaler (BayNNDv1) followed two major steps: i) multi-model fusion<sup>1</sup>, and ii) urban-rural distinguished downscaling<sup>2</sup>. During multi-model fusion, a total of 10 CMIP6 historical simulations were selected as inputs for 1990–2014, and 6 SSP2-RCP4.5 scenario projections for 2015–2019<sup>2</sup>. The imbalanced model numbers between the 2 phases (Phase 1: 1990–2014, Phase 2: 2015–2019) introduced additional heterogeneities. The cross-scenario divergences were way lower than the cross-model discrepancies, and thus we replaced SSP2-RCP4.5 with SSP3-RCP7.0 to reach homogeneity with the maximum number of models between the two Phases. We fused 8 coupled earth system models with interactive chemistry as i) BCC-ESM1, ii) CESM2-WACCM, iii) EC-Earth3-AerChem, iv) GFDL-ESM4, v) GISS-E2-1, vi) MRI-ESM2-0, vii) UKESM1-0-LL, and viii) CCMI, an average of 2 earlier generation atmospheric models, CESM1-WACCM and CMAM<sup>3-10</sup>. All the involved CMIP6 model simulation outputs are downloaded from Earth System Grid Federation repository platform: <https://esgf-node.llnl.gov/search/cmip6>.

Following the established methodology with replacement of data sources and adding *in situ* observations during 2014–2019 provided by China National Environmental Monitoring Centre (CNEMC), we improved the accuracy of BayNNDv1. The optimised product BayNNDv2 is of higher global overall accuracy  $R^2=0.91$ , RMSE=4.5 ppb for urban, and  $R^2=0.89$ , RMSE=5.2 ppb for rural sites.

### Method S2 | Phased Data Fusion

As the base ambient O<sub>3</sub> products were of different temporal coverage, time-period phased data fusion was conducted. For *Phase I* (Roman numerals were used here to avoid confusion with the aforementioned Phase 1) during 1990–2002, fusion with calibration were conducted on BayNNDv2 and M<sup>3</sup>-BME. Due to the lack of systematic observations in China during this period, we trained the supervised deep learning model merely based on the observation archives from Tropospheric Ozone Assessment Report (TOAR) project<sup>11</sup>, and predicted the ambient O<sub>3</sub> for China assisted with geographic and sociodemographic features as a compromised choice. For *Phase II* of 2003–2012, BayNNDv2, M<sup>3</sup>-BME and CEML were blended after unification into 1/8°×1/8° spatial resolution. Still, no Chinese localised observations were involved, but satellite-based remote-sensing measurements were included to increase the reliability in capturing the spatiotemporal pattern. For *Phase III* of 2013–2019, we mixed all four base databases nested in China territory, supervised by *in situ* observations from China National Environmental Monitoring Centre (CNEMC). The urban-rural distinguishment was inherited from BayNNDv2, and data fusions were performed for urban and rural concentrations separately.

All ground-level site-based observations were aggregated into 1/8°×1/8° as supervised training labels. The fusion processes can be expressed as follows:

$$\begin{aligned} \text{Phase I:} \quad O_3^{\text{urban}} &= f(\text{BayNND}^{\text{urban}}, M^3\text{-BME}, s_1, s_2, s_3, t_1, t_2, t_3), \\ O_3^{\text{rural}} &= f(\text{BayNND}^{\text{rural}}, M^3\text{-BME}, s_1, s_2, s_3, t_1, t_2, t_3), \\ \text{Phase II:} \quad O_3^{\text{urban}} &= f(\text{BayNND}^{\text{urban}}, M^3\text{-BME}, \text{CEML}, s_1, s_2, s_3, t_1, t_2, t_3), \\ O_3^{\text{rural}} &= f(\text{BayNND}^{\text{rural}}, M^3\text{-BME}, \text{CEML}, s_1, s_2, s_3, t_1, t_2, t_3), \\ \text{Phase III:} \quad O_3^{\text{urban}} &= f(\text{BayNND}^{\text{urban}}, M^3\text{-BME}, \text{CEML}, \text{TAP}, s_1, s_2, s_3, t_1, t_2, t_3), \\ O_3^{\text{rural}} &= f(\text{BayNND}^{\text{rural}}, M^3\text{-BME}, \text{CEML}, \text{TAP}, s_1, s_2, s_3, t_1, t_2, t_3), \end{aligned}$$

where  $f$  stands for the trained elastic net linear regressor,  $s_1, s_2, s_3$  refer to the spatial geometric coordinates, and  $t_1, t_2, t_3$  are temporal periodical and sequential indicators as listed below<sup>12</sup>. Cross-validation test results and overall performance evaluations were summarised in Table S6.

$$\begin{aligned}
s_1 &= \cos\left(2\pi \frac{\text{longitude}}{360}\right) \cos\left(2\pi \frac{\text{latitude}}{180}\right), \\
s_2 &= \cos\left(2\pi \frac{\text{longitude}}{360}\right) \sin\left(2\pi \frac{\text{latitude}}{180}\right), \\
s_3 &= \sin\left(2\pi \frac{\text{longitude}}{360}\right), \\
t_1 &= \cos\left(2\pi \frac{\text{month}}{12}\right), \\
t_2 &= \sin\left(2\pi \frac{\text{month}}{12}\right), \\
t_3 &= \frac{\text{month}}{360}.
\end{aligned}$$

It should be furtherly noted that the BayNNDv2 urban-rural downscaled dataset was treated fully as a core basis dataset, and then 3 other well-developed datasets (M<sup>3</sup>-BME, CEML and TAP) were fused using elastic net regressor rather than being incorporated as auxiliary predictors for Bayesian neural network downscaler. We selected such design for the purpose of maintaining the temporal homogeneity, as the elastic net regressor would “respect” the source dataset closest to the labels for supervision (i.e. observations), and regard the other two datasets as a strategy of “belt and braces (double insurance)” in case the Bayesian neural network “missed” any information that had been captured by M<sup>3</sup>-BME, CEML or TAP. The elastic net regressor (instead of other base machine learners like random forest or gradient boosting decision tree) would not substantially destroy the spatiotemporal pattern of the very input dataset closest to the observations, and tune with the rest input datasets if necessary. It can effectively avoid causing “fractures” in the “junction” year of different datasets (e.g. CEML starts from 2003, and hence 2003 is a junction year that the temporal fracture will be inclined to occur). When calculating the importance features of *Phase III* (2013–2019), the core dataset BayNNDv2 occupied 96.8% and 94.1% weights for urban and rural predictions, respectively, justifying the necessity and credibility of long-term global-scale space-time integrated training.

### Method S3 | Detailed specification of Chinese administrative divisions

We used 7-division scheme in this study. This scheme of Chinese Administrative Geographical Division considers geography, history, culture, and ethnicity into comprehensively. The municipalities directly under Chinese Central Government and Autonomous Regions are all of provincial executive level. **Northeast China** includes 3 provinces: Heilongjiang, Jilin, and Liaoning. **North China** includes 3 provinces: Hebei, Shanxi, Inner Mongolia Autonomous Region; and 2 direct-administered municipalities: Beijing and Tianjin. **East China** includes 7 provinces: Shandong, Jiangsu, Anhui, Zhejiang, Jiangxi, Fujian, and Taiwan; and a direct-administered municipality: Shanghai. **Central China** includes 3 provinces: Henan, Hubei, and Hunan. **South China** includes 3 provinces: Guangxi Zhuang Autonomous Region, Guangdong, and Hainan; and 2 Special Administrative Regions (SAR): Hong Kong SAR and Macao SAR. **Southwest China** includes 4 provinces: Tibet Autonomous Region, Yunnan, Sichuan, and Guizhou; and a direct-administered municipality: Chongqing. **Northwest China** includes 5 provinces: Xinjiang Uygur Autonomous Region, Qinghai, Gansu, Ningxia Hui Autonomous Region, and Shaanxi. **Jing-Jin-Ji (JJJ)** urban agglomeration consists of Beijing, Tianjin, 11 prefecture-level cities (Shijiazhuang, Baoding, Tangshan, Langfang, Qinhuangdao, Zhangjiakou, Chengde, Cangzhou, Hengshui, Xingtai, Handan) in Hebei Province, and Anyang in Henan Province. “Ji” (“冀”, pronounced as ji) is the ancient name of Hebei Province. Some schools abbreviate the megalopolis as BTH (Beijing, Tianjin, and Hebei). **Cheng-Yu (CY)** urban agglomeration consists of Sichuan Province (excluding Liangshan, Panzhihua, Aba, Ganzi, Guangyuan, Bazhong) and Chongqing (excluding Qianjiang, Pengshui, Youyang, Xiushan, Chengkou, Wushan, Wuxi, Fengjie). The alternative historical name of Chongqing is “Yu” (“渝”, pronounced as yú), and hence for the phonological harmony, Chengdu-Chongqing district is more commonly shorted as Cheng-Yu rather than Cheng-Chong. **Yangtze River Delta (YRD)** urban agglomeration consists of Jiangsu Province, Anhui Province, Zhejiang Province, and Shanghai. **The China Greater Bay Area (GBA)**

circumscribes Hong Kong SAR, Macao SAR, and 9 prefecture-level cities in Guangdong Province (Guangzhou, Shenzhen, Foshan, Dongguan, Zhongshan, Jiangmen, Huizhou, Zhuhai, Zhaoqing), which is alternatively entitled as the Guangdong-Hong Kong-Macao Greater Bay Area. The 9 cities in Guangdong Province are collectively named as Pearl River Delta (PRD) Economic Zone. The 7 Chinese administrative divisions and 4 megalopolises were mapped in Figure S1.

#### Method S4 | Identification of mortality causes

Meta-analyses were performed on the extracted cohort-based epidemiological evidences (e.g. hazard ratio, HR) relevant to long-term O<sub>3</sub> exposure from systematic review updated until October 2022. All reported mortality causes were included for meta-analysis extended from the latest relevant systematic reviews<sup>13,14</sup>, and the causes with pooled positive relative risks were considered for mortality estimation. Applying the Hunter-Schmidt estimator, 6 mortality causes (might not be mutually exclusive due to hierarchically overlapping) were identified to be of positive relative risks: non-accidental causes, chronic respiratory diseases, chronic obstructive pulmonary disease, cardiovascular diseases, ischaemic heart diseases, and congestive heart failure, as plotted in Supplementary Figures 3–7, and potential publication biases were tested by trim-and-fill method (Figure S8).

In terms of mortality estimation, the non-accidental cause mortalities were narrowed to mortalities of non-communicable diseases (NCDs), as it is reasonable to assume the non-accidental causes other than NCDs (e.g. communicable, maternal, neonatal, and nutritional diseases, injuries, suicide and homicide, etc.) are of no association with ambient O<sub>3</sub> exposure. In addition, mortality estimations in this study did not include the congestive heart failure which was not listed as an individual mortality cause in the GBD 2019 Study<sup>15</sup>. Therefore, further explorations on the nonlinear exposure-response relationships and excess mortality estimations only involve i) NCDs, ii) chronic respiratory diseases (CRDs), iii) chronic obstructive pulmonary disease (COPD), iv) cardiovascular diseases (CVDs), and v) ischaemic heart disease (IHD).

#### Method S5 | Construction of exposure-response curve

As the exposure-response association strengths may not necessarily follow the linear pattern, curved trends were explored by meta-regression enhanced by exposure-range resampling for the sake of more accurate risk estimation<sup>14,16,17</sup>. Most of the pre-existing studies were conducted on the North American and European countries where ambient O<sub>3</sub> pollution has been effectively constrained in the past decades, and thus the averaged exposure levels of the cohort participants were lower than the Chinese population. Under this circumstance, multi-cause mortality relative risks for Chinese residents estimated by conventional meta-regression method would rely on exposure extrapolation, leading to high uncertainties. To address this issue, exposure-range resampling would make full use of the literature-reported population exposure levels rather than the study-specific averaged exposure concentrations, so as to cover the exposure range as wide as possible and thus increase the estimation robustness.

The concentration-response curves were adopted in priority if reported in the literature. We queried the authors of the published studies providing the non-linear concentration-response relationships for the detailed values of the curves; and as for the studies we did not receive responses by October 2022, we recovered the values directly from the figure by mean of geometric measurement in Microsoft Visio. If the original studies did not explore the concentration-response trends, linear relative risk models were assumed across the reported exposure range, with the theoretical minimum risk exposure level (TMREL) presumed to be a random value uniformly distributed between the minimum and lowest 5<sup>th</sup> percentile following a previous study<sup>18</sup>. The statistical approach to reproduce the lowest 5<sup>th</sup> percentile was described in a prior systematic review<sup>14</sup>,

and the resampled/imputed distribution statistics were listed in Table S15. The estimated concentration-response curves for mortality risks of NCDs, chronic respiratory diseases, COPD, cardiovascular diseases, and ischaemic heart disease were presented in Figure S9.

The exposure range resampling reproduced the exposure level (OSDMA8 in ppb) by every 1 ppb increment between the literature-reported minimum and maximum exposure level as  $x$ . In linear-model presumed relative risk recovering, for each resampled exposure concentration  $x$ , the corresponding effective exposure “dose”  $\Delta x$  is defined as

$$\Delta x = \text{ReLU}\{x - \text{TMREL}\},$$

where ReLU is the rectified linear unit choosing the greater value between 0 and  $x - \text{TMREL}$ . Given the reported risk association (i.e. HR) with 95% confidence interval (CI) as  $\text{HR}_{\text{LB}}$  to  $\text{HR}_{\text{UB}}$  by every  $\Delta y$  incremental exposure, the relative risk with 95% CI at exposure concentration  $x$  can be calculated as

$$\text{HR}_x = e^{\ln \text{HR} \cdot \Delta x / \Delta y},$$

$$\text{HR}_{\text{LB},x} = e^{\ln \text{HR}_{\text{LB}} \cdot \Delta x / \Delta y},$$

$$\text{HR}_{\text{UB},x} = e^{\ln \text{HR}_{\text{UB}} \cdot \Delta x / \Delta y}.$$

Following the procedures illustrated above leads to an exposure-response sequence for each study that did not report the concentration-response curve; the fully resampled sequences undergo MR-BRT multi-study pooling with the literature-reported exposure-response curves.

Several previous studies have provided estimations on  $\text{O}_3$ -associated excess COPD mortality. Taking 2017 as an example, the GBD report estimated the COPD mortality as 113 (95% Uncertainty Interval, UI: 53–178) thousand<sup>17</sup>, which is lower than our results (183, 95% UI: 125–245 thousand), as GBD applied undersized RR values<sup>19</sup>. Yin et al. reported 178 (95% UI: 68–286) thousand COPD deaths attributable to  $\text{O}_3$  exposure<sup>20</sup>, which is more coherent with our result in terms of central estimate. This is because the RR value they used (RR=1.040, 95% CI: 1.013–1.067) from a single cohort study<sup>21</sup> is close to the multi-study pooled RR by our meta-analysis (RR=1.056, 95% CI: 1.029–1.084); but their result is still of greater estimation uncertainty. Contrarily, Malley et al. used oversized risk association strength (RR=1.12, 95% CI: 1.08–1.16) and reported 316 (95% UI: 230–403) thousand respiratory deaths for 2010<sup>22</sup>, which is substantially higher than our estimates (179, 95% UI: 122–241 thousand). The unneglectable cross-study divergences and great estimation uncertainties reveal the insufficiency of epidemiological evidences. Furthermore, leaving out cardiovascular mortality risks leads to dubious conservative overall estimations. We consider cardiopulmonary beyond respiratory mortality for the first time and thus provide an *aggressive* estimation to update the literature.

## Method S6 | Construction procedures of gridded population dataset

The step-by-step procedures to construct the gridded Chinese population dataset are illustrated in the flowchart (Figure S17), in which the rounded rectangles indicate procedural semi-manufactures, rectangles refer to the initial input and final output datasets, and the number-marked arrows represent operations.

**Starting point: UN WPP-adjusted GPWv4.** The Gridded Population of the World with adjustment from United Nation World Population Prospects<sup>23</sup> (version 4.11) was set as the footstone, as it is the latest global population distribution product with the finest spatial resolution (30"×30") and densest temporal coverage (2000–2019).



**Step 1: Spatial re-gridding.** The spatial resolution of finally enhanced ambient O<sub>3</sub> concentration dataset with urban-rural distinguishment is 1/8°×1/8°, based on which the population exposure levels were assessed. By averaging the 15×15 adjacent grids (1/8°=30"×15), the raw 30"×30" dataset was re-gridded into 1/8°×1/8°.

**Step 2: Temporal extrapolation.** The GPWv4 dataset covers 20 studied years: 2000–2019. For each re-gridded 1/8°×1/8° cell, the restricted cubic spline regression model with 3 knots was applied to the cell-level population against year, so as to extrapolate the temporal coverage onto the complete study years: 1990–2019, following previous studies<sup>1,24</sup>.

**Step 3: China localisation.** The global longitude-latitude-based grids were geographically projected onto the map of China provided by the Ministry of Natural Resources of People's Republic of China, and all grids belonging to China territory were extracted for further processing. Geographical mapping and administrative division projection (i.e. country, provinces, and prefecture-level cities) were performed in QGIS (version 3.26.10).

**Step 4: Urban-rural distinguishment.** The Population Dynamics dataset (version 1.01), identifying urban and rural population counts for each 1/8°×1/8° grid<sup>25</sup>, was extrapolated onto 30 consecutive years by mean of restricted cubic spline model<sup>2</sup>, based on which the urban and rural population fractions were calculated. The cell-specific fractions were then multiplied onto the 30-year extrapolated GPWv4 China gridded population dataset (i.e. procedural semi-manufactures of Step 3), to update the urban-rural distinguished population distribution. The consensus has been widely accepted that GPWv4 datasets reporting 20 consecutive years were more reliable than interpolated data products.

**Step 5: Urban-rural calibration.** The China Statistical Yearbook series reported the numbers of urban and rural residents for each year, with which the estimated values were linearly aligned. For an instance, if the predicted total count of urban residents of a certain province (Step 4) was  $Pop_{pred}$  while the factual count provided by the China Statistical Yearbook was  $Pop_{stat}$ , the urban population count for each grid was then multiplied by a coefficient of  $Pop_{pred}/Pop_{stat}$ . Province-level calibrations were performed for 2005–2019 in accordance with the Yearbook precision, while nation-level calibrations were conducted for 1990–2004 as a compromise given the data unavailability.

**Step 6: Age group specification.** Fractions of population aged above 25 were retrieved from GBD Population Estimates 1950–2019,<sup>26</sup> and the China Statistical Yearbook series 2004–2019<sup>27</sup>. Values provided by the China Statistical Yearbook series were adopted in priority for 2004–2019, while for the earlier years 1990–2003 when the China Statistical Yearbook did not archive the population pyramid, the GBD Population Estimates were used as a compromise. The nation-level year-specific fractions were multiplied onto each grid to identify the counts of population age ≥25. After this step, the enhanced gridded population age ≥25 differentiated with urban and rural residence was used as the capstone dataset for main analysis.

**Step 7: Gender group specification.** Genders were furtherly specified for sensitivity analysis. Province-level gender proportions for 2000–2019 and nation-level gender proportions for 1990–1999 were obtained from the China Statistical Yearbook series 1990–2019<sup>27</sup>. The province- or nation-level male and female proportions were uniformly applied onto each grid circumscribed inside the corresponding province or the whole country territory, respectively.

**Step 8: Dataset encapsulation.** After all the aforementioned data processing, the gridded population was structured into the meta-dataset: 1/8°×1/8° spatial resolution; yearly resolved spanning 1990–2019; each grid encapsulating 4 population counts as: i) urban male age ≥25, ii) urban female age ≥25, iii) rural male age ≥25, and iv) rural female age ≥25.

## Method S7 | Sensitivity analyses

Long-term ambient O<sub>3</sub> tracking covers earlier years beyond the satellite-based remote sensing measurements or chemical reanalysis (i.e. 1990–2002), indicating predictions would merely relied on the CMIP6 numerical simulations for this period.



We therefore extended a sensitivity analysis for the first-stage space-time Bayesian neural network-based data assimilation during 2003–2019 under two scenarios, as fusing eight CMIP6 models with (ScA) and without (ScB) a machine-learning-calibrated remote-sensing measurements and chemical reanalysis outputs<sup>28</sup>, assisted with over 40 auxiliary features<sup>2</sup>.

We then evaluated the accuracies of 10-fold cross-validation tests by random split (70% dataset matched with observations), external validation tests (the rest 30%), and overall fitting, as summarized in Table S16. We compared the developed ambient O<sub>3</sub> datasets under the two scenarios by coefficient of variation (CoV): standard deviation divided by the arithmetic mean. We concluded that the deep-learning-based prediction accuracies by solely using CMIP6 simulations were as competitive as fusing additional measurements, and no substantial discrepancies were observed between ScA and ScB (CoV=1.0%, spatiotemporal 5–95<sup>th</sup>tile: 0.1–2.8%).

We furtherly split the full dataset manually for cross-validation tests under ScB, maintaining the temporal coherence: i) 2003–2012 for training and 2013–2019 for testing; ii) 2003–2007 and 2015–2019 for training and 2008–2014 for testing; and iii) 2010–2019 for training and 2003–2009 for testing. All three temporally staged cross-validation tests had revealed good performances ( $R^2=0.90, 0.92, 0.92$ ; RMSE=2.86, 2.71, 2.70 ppb, respectively for the three tests). The constrained cross-scenario divergences and stable temporal generalizability verified the credibility of model-based ambient O<sub>3</sub> tracking in the earlier years.

Parallel with the curved risk model, the *linear risk model* was adopted for attributable mortality estimation as reference, which assumed that relative risks change linearly with the exposure level  $x$  following

$$RR_x = e^{\ln RR \frac{\Delta x}{\Delta y}}$$

where RR is the multi-study pooled value scaled in each  $\Delta y$  incremental exposure, and  $\Delta x$  is the effective dose above the TMREL.

We performed a series of further sensitivity analyses on the estimation for 2017 as an example. The exposure-response relationships might be the major source of estimation uncertainty, and thus we applied the multi-study pooled RRs onto the simplest log-linear model parallel to the curved model as presented in the main results. The threshold (also known as TMREL or low-concentration cut-off) for long-term O<sub>3</sub> exposure-associated mortality risk was also contentious, and thence we tested several values as directed in literature: i) the global lowest 5<sup>th</sup> percentile PWE in 2017 by BayNND, 42.6 ppb (Scenario 1, Sc1); ii) the 30-year global lowest 5<sup>th</sup> percentile PWE by BayNND, 40.8 ppb (Sc2); and iii) the maximum of literature-reported lowest 5<sup>th</sup> percentile exposure levels from studies included for meta-analysis, 44.0 ppb (Sc3). We used the grid-averaged ambient O<sub>3</sub> concentrations to quantify population exposure, supposing the ambient O<sub>3</sub> exposure levels were not distinguished for urban and rural environments, as Sc4. Gender-specified mortality metrics other than the gender-standardized estimates reported by IHME, were used as Sc5. Province-specific mortality metrics for 2017 provided by China CDC were applied as Sc6<sup>29</sup>. In Sc7, we replaced the O<sub>3</sub> tracking dataset with M<sup>3</sup>-BME solely, which was used in the GBD 2019 study. In Sc8, we adopted cardiovascular mortality risk association (RR=1.227, 95% CI: 1.108–1.359,  $p$ -value=0.79) pooled from 2 cohort studies on Chinese population reporting higher RRs<sup>30,31</sup>.

Estimations for excess deaths differentiating the designed schemes were summarized in Table S17. The cross-scheme discrepancies were constrained not to exceed 10%, and therefore sensitivity analyses validated the robustness of our mortality estimations, verified the coherence of the data sources, and justified the rationality of innovations in our study design.

## Method S8 | Cross-validation for spatiotemporal generalizability

Since China lacked systematic ground-level measurements in earlier years before 2013, and the observation sites deployed in urban and rural environments were disproportional. We therefore decided to train the model at global scale with sufficient supervision by observations, and conducted strengthened rigorous cross-validation tests on the spatiotemporal extrapolation reliability to verify the generalizability of the deep learning downscaling algorithm. Besides the cross-validation and external validation tests by random split, we extended region-clustered cross-validation tests on spatial extrapolation capability (cvs<sub>1</sub>: training on North America, testing on Europe; cvs<sub>2</sub>: training on Europe, testing on North America; cvs<sub>3</sub>: training on North America and Europe, testing on Asia; and cvs<sub>4</sub>: training on locations outside China, testing on China), and staged cross-validation tests on global-scale temporal generalization (cvt<sub>1</sub>: training on 1990–2013, testing on 2014–2019; cvt<sub>2</sub>: training on 1990–2007 and 2014–2019, testing on 2008–2013; cvt<sub>3</sub>: training on 1990–2001 and 2008–2019, testing on 2002–2007; cvt<sub>4</sub>: training on 1990–1995 and 2002–2019, testing on 1996–2001; cvt<sub>5</sub>: training on 1996–2019, testing on 1990–1995) for the second-stage urban-rural differentiated downscaling. Spatiotemporal generalizability tests are summarized in Table S7.

## Supplementary Tables

**Table S1 | Province-level average of ambient ozone concentrations in 1990 and 2019.**

Urban, rural and population-weighted exposure (PWE) concentrations are scaled as 6-month (April to September) ozone-season daily 8-hour maximum average (OSDMA8) in ppb for either year. Statistics include the regional median and spatial 5-95<sup>th</sup> percentile range. Hong Kong SAR and Macao SAR have realised full urbanisation before 1990, and thus rural concentrations are not considered.

| Region          | Year 1990 |             |       |             |      |             | Year 2019 |             |       |              |      |             |
|-----------------|-----------|-------------|-------|-------------|------|-------------|-----------|-------------|-------|--------------|------|-------------|
|                 | Urban     |             | Rural |             | PWE  |             | Urban     |             | Rural |              | PWE  |             |
| Nationwide      | 40.2      | (20.7–48.7) | 54.2  | (44.2–62.8) | 49.0 | (39.1–57.2) | 59.5      | (46.1–91.9) | 67.9  | (56.0–93.2)  | 63.3 | (52.4–87.3) |
| Northeast China | 34.6      | (31.4–43.4) | 47.6  | (40.6–58.3) | 44.1 | (36.8–53.8) | 49.0      | (40.2–74.5) | 59.7  | (47.0–78.5)  | 55.6 | (43.8–69.9) |
| Heilongjiang    | 32.5      | (30.3–36.7) | 46.9  | (39.3–48.1) | 42.3 | (36.4–44.5) | 39.4      | (34.0–48.5) | 49.6  | (43.9–56.5)  | 43.4 | (37.9–51.6) |
| Jilin           | 36.3      | (31.8–42.1) | 48.7  | (46.9–58.3) | 44.9 | (42.1–53.2) | 42.9      | (41.6–59.7) | 56.4  | (50.5–67.1)  | 48.5 | (45.3–62.8) |
| Liaoning        | 40.7      | (39.2–44.4) | 56.5  | (54.4–58.6) | 51.0 | (49.1–53.7) | 61.8      | (54.1–76.5) | 67.1  | (63.4–81.0)  | 63.5 | (57.0–77.9) |
| North China     | 38.2      | (30.9–45.5) | 51.1  | (45.5–59.3) | 46.5 | (41.6–53.4) | 58.3      | (42.1–93.2) | 65.7  | (54.3–95.7)  | 61.4 | (50.0–87.1) |
| Inner Mongolia  | 37.9      | (30.5–40.6) | 49.3  | (45.5–53.6) | 45.9 | (41.1–49.8) | 54.7      | (41.8–86.6) | 59.8  | (52.7–87.5)  | 56.6 | (45.8–86.9) |
| Beijing         | 44.6      | (40.0–45.3) | 56.2  | (54.0–58.1) | 50.4 | (47.0–51.7) | 96.1      | (84.7–96.1) | 96.5  | (89.8–96.5)  | 96.2 | (85.4–96.2) |
| Tianjin         | 45.3      | (45.1–45.3) | 58.1  | (57.6–58.1) | 52.4 | (52.0–52.4) | 87.2      | (87.2–90.2) | 90.5  | (90.5–92.0)  | 87.8 | (87.8–90.5) |
| Hebei           | 44.4      | (40.0–45.5) | 56.2  | (54.0–59.8) | 53.4 | (50.7–56.4) | 89.8      | (87.1–99.0) | 91.8  | (89.2–96.5)  | 90.7 | (88.0–98.0) |
| Shanxi          | 38.4      | (35.5–52.2) | 57.5  | (52.0–66.7) | 52.5 | (47.8–63.0) | 90.3      | (80.2–92.0) | 91.6  | (87.9–96.3)  | 90.8 | (83.3–93.7) |
| East China      | 37.1      | (16.3–44.9) | 52.2  | (37.9–56.5) | 46.2 | (36.0–54.6) | 65.1      | (49.7–90.8) | 71.3  | (62.2–96.4)  | 67.9 | (55.6–91.8) |
| Shandong        | 43.8      | (39.9–47.4) | 56.1  | (54.6–60.2) | 52.7 | (50.5–56.7) | 79.2      | (75.3–96.5) | 88.3  | (85.2–101.0) | 82.7 | (79.1–98.3) |
| Jiangsu         | 38.4      | (37.7–44.9) | 53.4  | (50.9–56.5) | 48.7 | (46.8–52.9) | 75.1      | (63.0–85.7) | 82.5  | (70.7–91.6)  | 77.3 | (65.3–87.5) |
| Shanghai        | 38.0      | (38.0–38.0) | 50.9  | (50.9–50.9) | 44.2 | (44.2–44.2) | 63.0      | (63.0–63.0) | 70.7  | (70.7–70.7)  | 63.9 | (63.9–63.9) |
| Anhui           | 38.4      | (29.6–41.3) | 53.2  | (47.0–56.5) | 49.9 | (43.1–53.1) | 78.2      | (50.8–83.0) | 86.6  | (68.4–91.6)  | 81.9 | (58.6–86.8) |
| Jiangxi         | 29.4      | (20.3–31.2) | 43.9  | (37.9–46.5) | 39.6 | (32.8–41.7) | 51.7      | (49.7–65.1) | 65.1  | (62.2–71.3)  | 57.4 | (55.0–67.7) |
| Zhejiang        | 36.6      | (21.4–40.5) | 50.9  | (39.2–56.5) | 46.1 | (33.2–51.1) | 61.3      | (50.9–85.7) | 67.5  | (63.1–91.6)  | 63.2 | (54.6–87.5) |
| Fujian          | 21.4      | (20.1–38.6) | 44.5  | (43.5–57.2) | 37.9 | (36.8–51.9) | 49.7      | (48.1–56.4) | 63.1  | (61.1–68.1)  | 54.2 | (52.5–60.3) |
| Taiwan          | 37.4      | (37.4–37.5) | 54.7  | (50.7–54.7) | 44.4 | (42.8–44.5) | 56.6      | (53.1–56.6) | 68.8  | (65.3–68.8)  | 59.3 | (55.7–59.3) |
| Central China   | 40.0      | (26.1–69.2) | 52.7  | (44.8–70.0) | 48.1 | (38.9–56.6) | 61.5      | (49.8–86.4) | 67.5  | (60.5–87.6)  | 64.5 | (54.0–83.9) |
| Henan           | 51.1      | (42.4–57.5) | 60.6  | (54.2–70.0) | 58.7 | (51.8–67.5) | 76.8      | (62.6–82.6) | 83.0  | (66.8–87.3)  | 79.7 | (64.5–84.8) |
| Hubei           | 47.6      | (27.0–55.2) | 53.5  | (43.9–60.0) | 52.0 | (39.5–58.7) | 62.6      | (51.8–86.4) | 68.9  | (62.9–87.6)  | 65.0 | (56.1–86.8) |
| Hunan           | 36.6      | (25.9–40.0) | 48.4  | (42.1–52.7) | 45.6 | (38.2–49.7) | 50.1      | (49.6–61.2) | 62.3  | (58.0–67.5)  | 55.3 | (53.1–63.9) |
| South China     | 32.3      | (18.2–55.8) | 47.3  | (43.2–56.9) | 41.3 | (25.1–50.5) | 57.5      | (52.5–66.5) | 63.1  | (59.3–69.8)  | 60.2 | (51.6–66.7) |
| Guangxi         | 32.2      | (26.9–55.8) | 46.8  | (44.9–56.9) | 43.7 | (41.1–56.7) | 57.5      | (53.7–60.5) | 63.1  | (59.3–69.4)  | 60.3 | (56.4–64.9) |
| Guangdong       | 32.3      | (18.2–56.0) | 49.6  | (43.2–59.6) | 43.2 | (33.9–58.3) | 60.7      | (52.5–66.5) | 66.9  | (61.9–69.8)  | 62.5 | (55.2–67.4) |
| Hainan          | 35.0      | (35.0–35.5) | 54.8  | (53.7–54.8) | 49.3 | (48.5–49.4) | 51.4      | (51.4–58.1) | 60.3  | (60.3–63.0)  | 55.0 | (55.0–60.1) |
| Hong Kong       | 33.6      | (33.2–33.9) | -     | -           | 33.6 | (33.2–33.9) | 52.5      | (52.1–53.2) | -     | -            | 52.5 | (52.1–53.2) |
| Macao           | 32.3      | (32.3–32.3) | -     | -           | 32.3 | (32.3–32.3) | 66.5      | (66.5–66.5) | -     | -            | 66.5 | (66.5–66.5) |
| Northwest China | 38.4      | (32.9–46.0) | 50.9  | (42.6–58.6) | 48.9 | (39.2–56.5) | 51.1      | (42.0–62.1) | 59.8  | (51.8–69.4)  | 57.3 | (47.4–67.6) |
| Xinjiang        | 38.6      | (32.9–46.4) | 50.9  | (42.6–60.8) | 48.1 | (40.4–57.5) | 48.8      | (41.7–61.1) | 58.1  | (50.1–71.7)  | 53.3 | (45.7–66.2) |
| Qinghai         | 40.2      | (37.0–42.9) | 50.0  | (47.2–54.2) | 47.7 | (44.8–51.5) | 56.2      | (46.4–62.4) | 59.7  | (52.9–67.5)  | 57.7 | (49.3–64.7) |
| Gansu           | 37.4      | (30.4–40.4) | 50.3  | (44.3–53.8) | 47.9 | (41.7–51.3) | 52.8      | (46.4–56.6) | 63.8  | (51.8–69.4)  | 58.5 | (49.2–63.2) |
| Ningxia         | 37.5      | (30.4–38.0) | 51.2  | (44.3–51.5) | 47.6 | (40.7–47.8) | 51.7      | (47.5–56.5) | 64.2  | (59.7–65.7)  | 56.7 | (52.4–60.2) |
| Shaanxi         | 33.5      | (21.1–38.9) | 51.2  | (42.3–53.9) | 47.0 | (37.3–50.3) | 50.4      | (47.5–82.5) | 61.8  | (59.7–84.2)  | 55.0 | (52.4–83.2) |
| Southwest China | 36.7      | (18.8–41.9) | 50.3  | (40.2–54.5) | 44.9 | (33.8–50.0) | 56.0      | (47.1–64.9) | 64.1  | (59.0–68.6)  | 58.9 | (51.8–64.3) |
| Tibet           | 38.9      | (35.8–43.4) | 51.6  | (47.3–57.5) | 49.5 | (45.3–55.1) | 62.2      | (49.3–67.4) | 63.8  | (59.0–68.9)  | 63.3 | (55.9–68.4) |
| Sichuan         | 32.1      | (12.0–38.0) | 49.4  | (35.3–53.2) | 45.8 | (30.5–50.0) | 53.9      | (43.7–58.3) | 64.1  | (59.2–67.2)  | 58.6 | (50.9–62.4) |
| Chongqing       | 22.6      | (12.0–26.8) | 42.3  | (35.3–47.4) | 36.7 | (28.7–41.6) | 52.7      | (50.8–56.5) | 64.7  | (61.9–66.9)  | 56.7 | (54.5–59.9) |
| Guizhou         | 24.4      | (14.6–29.9) | 43.1  | (38.4–48.4) | 40.0 | (34.5–45.3) | 51.4      | (48.8–56.0) | 62.0  | (57.7–67.6)  | 56.8 | (53.3–61.9) |
| Yunnan          | 32.1      | (22.6–35.7) | 47.7  | (43.2–51.3) | 44.8 | (39.4–48.4) | 52.2      | (47.9–61.3) | 64.0  | (59.0–66.7)  | 58.2 | (53.6–64.1) |

**Table S2 | Regional and nationwide 1990 mortality metrics associated with ozone exposure.**

Excess cardiopulmonary mortalities are defined as the total deaths caused from COPD and all-type cardiovascular diseases. Three mortality metrics are considered as i) number of excess deaths in thousand, ii) mortality rate per 100 000, and iii) years of life lost (YLLs) in million years. Estimates are summarised by median with 95% uncertainty intervals from 1000-time Monte Carlo bootstrap.

| Region          | Excess Deaths (thousand) |                           |                           | Mortality Rates (per 100 000) |                        |                        | YLLs (million years)   |                        |                        |
|-----------------|--------------------------|---------------------------|---------------------------|-------------------------------|------------------------|------------------------|------------------------|------------------------|------------------------|
|                 | Urban                    | Rural                     | Total                     | Urban                         | Rural                  | Total                  | Urban                  | Rural                  | Total                  |
| Northeast China | 4.0<br>(2.5 to 5.4)      | 17.5<br>(11.4 to 24.1)    | 21.5<br>(13.9 to 29.6)    | 17.9<br>(11.5 to 24.8)        | 28.5<br>(18.4 to 39.2) | 26.2<br>(16.9 to 36.1) | 0.44<br>(0.28 to 0.61) | 0.61<br>(0.39 to 0.84) | 1.05<br>(0.66 to 1.44) |
| North China     | 14.3<br>(9.3 to 19.9)    | 29.0<br>(18.8 to 39.8)    | 43.3<br>(28.1 to 59.6)    | 23.1<br>(14.9 to 32.0)        | 34.0<br>(22.0 to 46.7) | 31.0<br>(20.0 to 42.6) | 0.57<br>(0.36 to 0.79) | 0.73<br>(0.47 to 1.01) | 1.29<br>(0.81 to 1.77) |
| East China      | 41.0<br>(26.3 to 56.5)   | 67.1<br>(43.4 to 91.9)    | 107.8<br>(69.6 to 148.2)  | 22.5<br>(14.5 to 31.0)        | 34.2<br>(22.1 to 46.9) | 30.3<br>(19.6 to 41.7) | 0.56<br>(0.34 to 0.75) | 0.74<br>(0.47 to 1.01) | 1.29<br>(0.81 to 1.76) |
| Central China   | 18.6<br>(12.1 to 25.8)   | 37.5<br>(24.3 to 51.7)    | 56.1<br>(36.3 to 77.4)    | 22.0<br>(14.2 to 30.3)        | 29.6<br>(19.1 to 40.8) | 27.6<br>(17.8 to 38.0) | 0.54<br>(0.34 to 0.74) | 0.64<br>(0.41 to 0.88) | 1.17<br>(0.73 to 1.61) |
| South China     | 1.5<br>(0.8 to 2.0)      | 13.9<br>(9.0 to 19.4)     | 15.5<br>(9.9 to 21.5)     | 2.3<br>(1.5 to 3.2)           | 21.3<br>(13.7 to 29.5) | 15.1<br>(9.7 to 20.9)  | 0.05<br>(0.03 to 0.08) | 0.47<br>(0.29 to 0.64) | 0.54<br>(0.34 to 0.74) |
| Northwest China | 2.6<br>(1.7 to 3.6)      | 18.6<br>(11.9 to 25.5)    | 21.2<br>(13.6 to 29.2)    | 14.5<br>(9.3 to 20.1)         | 29.5<br>(19.1 to 40.7) | 27.6<br>(17.8 to 38.0) | 0.35<br>(0.21 to 0.49) | 0.64<br>(0.41 to 0.88) | 0.99<br>(0.63 to 1.38) |
| Southwest China | 2.3<br>(1.5 to 3.1)      | 31.6<br>(20.3 to 43.6)    | 34.0<br>(21.9 to 46.9)    | 4.4<br>(2.8 to 6.1)           | 23.5<br>(15.2 to 32.5) | 20.2<br>(13.0 to 28.0) | 0.11<br>(0.06 to 0.15) | 0.51<br>(0.32 to 0.69) | 0.62<br>(0.40 to 0.86) |
| Nationwide      | 84.2<br>(54.3 to 116.3)  | 215.3<br>(139.1 to 296.1) | 299.5<br>(193.3 to 412.4) | 17.5<br>(11.3 to 24.2)        | 29.4<br>(19.0 to 40.4) | 26.3<br>(17.0 to 36.2) | 2.62<br>(1.62 to 3.61) | 4.34<br>(2.75 to 5.95) | 6.95<br>(4.37 to 9.56) |

**Table S3 | Historical 30-year regional and nationwide ozone-associated mortality trends.**

Longitudinal trends scaled in decadal average change rates are calculated by log-linear meta-regression maximum likelihood estimator from the annually resolved values with 95% confident intervals (CIs). When estimated trend approaches 0, an additional decimal place is reserved.

| Region          | Excess Deaths (thousand dec <sup>-1</sup> ) |                           |                        | Mortality Rates (per 100 000 dec <sup>-1</sup> ) |                        |                        | YLLs (million years dec <sup>-1</sup> ) |                              |                              |
|-----------------|---------------------------------------------|---------------------------|------------------------|--------------------------------------------------|------------------------|------------------------|-----------------------------------------|------------------------------|------------------------------|
|                 | Urban                                       | Rural                     | Total                  | Urban                                            | Rural                  | Total                  | Urban                                   | Rural                        | Total                        |
| Northeast China | 1.9<br>(1.3 to 2.8)                         | -0.07<br>(-0.09 to -0.05) | 1.8<br>(1.2 to 2.7)    | 0.6<br>(0.4 to 0.7)                              | -0.2<br>(-0.4 to -0.1) | -0.7<br>(-1.0 to -0.7) | -0.019<br>(-0.028 to -0.011)            | -0.041<br>(-0.054 to -0.027) | -0.060<br>(-0.077 to -0.036) |
| North China     | 7.7<br>(5.0 to 11.9)                        | -1.5<br>(-2.2 to -1.0)    | 6.2<br>(4.0 to 9.7)    | 2.6<br>(1.7 to 3.4)                              | 1.8<br>(1.1 to 2.3)    | 1.0<br>(0.6 to 1.2)    | 0.012<br>(0.009 to 0.015)               | -0.010<br>(-0.018 to -0.004) | 0.002<br>(-0.001 to 0.005)   |
| East China      | 18.1<br>(11.1 to 29.5)                      | -8.8<br>(-12.1 to -6.4)   | 9.3<br>(4.7 to 17.4)   | 1.2<br>(0.8 to 1.5)                              | 0.3<br>(0.2 to 0.4)    | -0.6<br>(-1.0 to -0.3) | -0.016<br>(-0.019 to -0.013)            | -0.039<br>(-0.053 to -0.027) | -0.055<br>(-0.068 to -0.044) |
| Central China   | 9.9<br>(6.4 to 15.3)                        | -1.8<br>(-2.5 to -1.3)    | 8.1<br>(5.1 to 12.7)   | 1.9<br>(1.3 to 2.5)                              | 1.6<br>(1.0 to 2.1)    | 0.9<br>(0.5 to 1.1)    | 0.001<br>(-0.001 to 0.003)              | -0.009<br>(-0.014 to -0.005) | -0.008<br>(-0.012 to -0.005) |
| South China     | 4.4<br>(2.8 to 6.9)                         | 0.17<br>(0.11 to 0.26)    | 4.6<br>(2.9 to 7.3)    | 4.2<br>(2.7 to 5.9)                              | 1.2<br>(0.8 to 1.6)    | 1.2<br>(0.8 to 1.6)    | 0.075<br>(0.050 to 0.109)               | -0.006<br>(-0.009 to -0.004) | 0.069<br>(0.044 to 0.096)    |
| Northwest China | 0.9<br>(0.6 to 1.4)                         | -0.8<br>(-1.1 to -0.6)    | 0.08<br>(0.01 to 0.28) | 0.2<br>(0.1 to 0.3)                              | -0.4<br>(-0.6 to -0.3) | -1.3<br>(-1.8 to -0.8) | -0.018<br>(-0.028 to -0.008)            | -0.046<br>(-0.064 to -0.032) | -0.063<br>(-0.092 to -0.041) |
| Southwest China | 4.1<br>(2.7 to 6.3)                         | -1.2<br>(-1.7 to -0.8)    | 2.9<br>(1.9 to 4.6)    | 3.5<br>(2.2 to 4.8)                              | 1.6<br>(1.0 to 2.1)    | 0.5<br>(0.3 to 0.7)    | 0.062<br>(0.040 to 0.086)               | -0.008<br>(-0.013 to -0.003) | 0.053<br>(0.033 to 0.080)    |
| Nationwide      | 47.1<br>(30.4 to 64.2)                      | -13.9<br>(-19.4 to -9.1)  | 33.2<br>(21.3 to 44.8) | 2.1<br>(1.4 to 2.8)                              | 0.7<br>(0.4 to 0.9)    | 0.2<br>(0.1 to 0.3)    | 0.104<br>(0.074 to 0.138)               | -0.162<br>(-0.210 to -0.117) | -0.059<br>(-0.087 to -0.035) |

**Table S4 | 30-year multi-cause cross-sectional baseline mortality rates of Chinese population.**

Mortality rates (per 100 000) of 5 causes (NCDs, non-communicable diseases; CRDs, chronic respiratory diseases; COPD, chronic obstructive pulmonary disease; CVDs, cardiovascular diseases; IHD, ischaemic heart disease) are retrieved from the IHME GBD 2019 result portal (<https://vizhub.healthdata.org/gbd-results>), with 95% uncertainty intervals.

| Year | NCDs                  | CRDs                 | COPD                 | CVDs                 | IHD                  |
|------|-----------------------|----------------------|----------------------|----------------------|----------------------|
| 1990 | 954.5 (856.2, 1049.4) | 215.1 (157.8, 241.2) | 206.1 (151.1, 231.2) | 396.0 (353.5, 443.6) | 100.0 (88.3, 111.9)  |
| 1991 | 940.0 (854.0, 1032.0) | 211.9 (157.0, 236.6) | 203.2 (149.9, 226.9) | 388.3 (348.9, 437.3) | 99.1 (88.6, 111.4)   |
| 1992 | 925.0 (840.6, 1015.4) | 208.8 (154.4, 233.6) | 200.4 (147.6, 224.5) | 381.3 (341.7, 427.2) | 97.7 (87.5, 108.7)   |
| 1993 | 911.1 (829.3, 993.2)  | 205.0 (151.6, 227.5) | 196.8 (144.3, 218.7) | 374.7 (340.7, 414.2) | 96.5 (87.2, 107.2)   |
| 1994 | 891.7 (818.6, 967.0)  | 199.4 (147.2, 220.9) | 191.5 (140.9, 211.3) | 365.0 (331.9, 407.2) | 94.2 (86.0, 104.3)   |
| 1995 | 876.4 (814.3, 945.0)  | 193.3 (143.7, 213.0) | 185.5 (137.5, 204.7) | 358.7 (329.1, 401.3) | 92.8 (84.9, 104.0)   |
| 1996 | 866.5 (807.4, 931.4)  | 188.0 (139.1, 205.9) | 180.5 (133.0, 198.0) | 355.7 (326.6, 393.2) | 92.5 (84.9, 101.9)   |
| 1997 | 853.5 (802.1, 912.8)  | 181.3 (136.6, 198.0) | 174.1 (130.1, 190.8) | 351.5 (326.4, 385.9) | 92.1 (85.4, 100.8)   |
| 1998 | 846.5 (791.4, 903.2)  | 175.5 (134.4, 191.2) | 168.6 (128.1, 183.9) | 349.8 (323.4, 384.5) | 92.6 (85.6, 101.3)   |
| 1999 | 852.9 (801.2, 906.7)  | 172.7 (136.5, 188.0) | 165.8 (130.5, 180.4) | 355.2 (328.7, 392.8) | 95.1 (88.1, 104.5)   |
| 2000 | 869.2 (816.2, 928.7)  | 170.8 (136.5, 186.0) | 164.0 (130.4, 178.3) | 366.5 (339.6, 404.3) | 100.4 (93.1, 109.9)  |
| 2001 | 874.7 (817.9, 940.8)  | 166.2 (138.3, 180.8) | 159.5 (131.8, 173.8) | 373.4 (345.9, 409.0) | 105.6 (97.7, 115.1)  |
| 2002 | 883.9 (827.3, 949.0)  | 162.5 (135.8, 176.5) | 155.9 (129.6, 169.5) | 382.5 (352.3, 418.1) | 112.4 (103.7, 122.6) |
| 2003 | 893.4 (834.9, 953.9)  | 158.7 (136.6, 172.1) | 152.2 (130.2, 165.2) | 390.9 (362.7, 423.4) | 120.2 (111.3, 129.7) |
| 2004 | 908.8 (852.7, 964.6)  | 156.3 (137.0, 168.5) | 149.8 (130.7, 161.7) | 401.0 (371.9, 434.0) | 128.2 (118.7, 138.5) |
| 2005 | 905.0 (848.7, 960.5)  | 150.4 (132.6, 161.9) | 144.2 (127.0, 155.2) | 402.2 (373.2, 435.7) | 133.1 (123.5, 143.8) |
| 2006 | 878.9 (826.9, 935.4)  | 140.2 (126.0, 150.2) | 134.4 (120.3, 143.9) | 392.4 (363.2, 421.7) | 134.1 (124.4, 144.5) |
| 2007 | 868.2 (817.4, 920.9)  | 133.4 (120.3, 143.7) | 127.8 (115.0, 137.7) | 390.5 (362.3, 419.7) | 137.0 (126.9, 146.9) |
| 2008 | 873.9 (821.9, 927.0)  | 130.1 (116.9, 140.8) | 124.7 (112.2, 134.9) | 397.7 (367.1, 426.9) | 142.7 (131.6, 154.0) |
| 2009 | 884.9 (835.0, 942.2)  | 127.9 (115.7, 137.9) | 122.5 (110.8, 131.9) | 408.4 (378.1, 437.2) | 149.9 (138.4, 161.0) |
| 2010 | 896.7 (834.7, 961.8)  | 125.3 (113.5, 137.4) | 119.9 (108.5, 131.6) | 419.9 (384.8, 451.8) | 158.0 (144.6, 170.8) |
| 2011 | 895.2 (832.5, 961.1)  | 120.6 (108.2, 135.9) | 115.3 (103.4, 129.5) | 424.3 (386.3, 458.8) | 163.0 (148.0, 177.0) |
| 2012 | 882.7 (820.2, 947.7)  | 114.9 (104.2, 130.7) | 109.7 (99.5, 125.1)  | 420.3 (385.4, 452.7) | 163.5 (149.5, 176.2) |
| 2013 | 874.6 (804.4, 941.0)  | 110.1 (99.2, 129.5)  | 105.0 (94.5, 123.9)  | 420.3 (382.7, 455.0) | 166.3 (151.1, 181.2) |
| 2014 | 870.7 (800.5, 949.1)  | 106.4 (95.2, 125.3)  | 101.5 (90.7, 119.9)  | 420.0 (379.6, 458.2) | 167.9 (151.6, 183.2) |
| 2015 | 866.7 (784.9, 948.9)  | 103.4 (92.5, 122.9)  | 98.5 (88.2, 117.8)   | 419.1 (378.7, 459.0) | 169.1 (152.9, 186.0) |
| 2016 | 876.4 (787.8, 969.9)  | 102.9 (89.9, 124.0)  | 98.1 (85.5, 118.2)   | 424.4 (377.3, 474.3) | 171.6 (152.0, 191.3) |
| 2017 | 883.9 (788.6, 980.8)  | 101.8 (89.6, 124.6)  | 97.1 (85.5, 119.0)   | 427.8 (378.5, 475.3) | 174.3 (155.1, 194.7) |
| 2018 | 894.6 (788.2, 1008.6) | 102.2 (88.1, 124.1)  | 97.6 (84.1, 119.3)   | 431.3 (375.8, 488.6) | 176.3 (153.9, 200.0) |
| 2019 | 914.6 (800.2, 1037.7) | 104.2 (89.3, 126.8)  | 99.7 (85.4, 121.6)   | 439.6 (379.3, 499.7) | 179.8 (154.6, 204.5) |

**Table S5 | Associations between rural-urban ambient ozone difference and land cover features.**

The rural-urban differences are defined as localised (i.e. within a prescribed downscaled spatial grid) rural ambient O<sub>3</sub> concentration minus the adjacent urban levels. Backward stepwise selection (*p*-value <0.20) is adopted to identify associated variables. Features with high collinearity is censored as appropriate (e.g. *emission rate of BC, aerosol optical depth at 550 nm, and surface PM<sub>2.5</sub> concentrations are deleted due to collinearity with emission rate of OC*). Regression coefficient  $\beta_s$  shows the standardised effect of each feature when controlling all the other considered factors, reported with Wald's *p*-value and 95% CI. The population-related features are obtained from aforementioned calibration. The emission rates of NO<sub>x</sub>, total NMVOC, organic carbon (OC), NH<sub>3</sub>, CO and SO<sub>2</sub> are retrieved from Emission Inventory developed by Peking University (PKU-Inventory)<sup>32-42</sup> and Multi-resolution Emission Inventory for China (MEIC)<sup>43-49</sup>, while the emission rates of biogenic NMVOC are modelled by CESM2-WACCM (accessed from the CMIP6 repository: <https://esgf-node.llnl.gov/search/cmip6>). Biomass features, vegetation, and urban land occupation fractions refer to the Land Use Harmonisation database (*historical* experiment for 1990–2014 and *ssp370* experiment for 2015–2019)<sup>50,51</sup>.

| Features                                        | $\beta_s$ | <i>p</i> -value | 95% CI          |
|-------------------------------------------------|-----------|-----------------|-----------------|
| <b>Population and urbanisation indices</b>      |           |                 |                 |
| <i>lg-transformed total population</i>          | 1.832     | <0.001          | (1.761, 1.902)  |
| <i>urban population fraction</i>                | 0.144     | <0.001          | (0.106, 0.182)  |
| <i>urban land occupation</i>                    | 0.086     | 0.001           | (0.036, 0.136)  |
| <b>Emission rate</b>                            |           |                 |                 |
| <i>emission rate of NO<sub>x</sub></i>          | -0.053    | 0.10            | (-0.117, 0.010) |
| <i>emission rate of total NMVOC</i>             | 0.138     | <0.001          | (0.094, 0.182)  |
| <i>emission rate of biogenic NMVOC</i>          | 0.231     | <0.001          | (0.193, 0.270)  |
| <i>emission rate of OC</i>                      | 1.379     | <0.001          | (1.286, 1.473)  |
| <i>emission rate of NH<sub>3</sub></i>          | -0.030    | 0.18            | (-0.075, 0.014) |
| <i>emission rate of CO</i>                      | 0.164     | <0.001          | (0.133, 0.195)  |
| <i>emission rate of SO<sub>2</sub></i>          | 0.156     | <0.001          | (0.102, 0.210)  |
| <b>Vegetation land occupation</b>               |           |                 |                 |
| <i>C<sub>3</sub> annual and perennial crops</i> | 0.201     | 0.006           | (0.057, 0.345)  |
| <i>C<sub>4</sub> annual and perennial crops</i> | 0.316     | <0.001          | (0.184, 0.449)  |
| <i>pasture</i>                                  | 0.370     | <0.001          | (0.313, 0.427)  |
| <i>rangeland</i>                                | 0.826     | <0.001          | (0.728, 0.925)  |
| <i>primary forested land</i>                    | 0.397     | <0.001          | (0.349, 0.445)  |
| <i>primary non-forested land</i>                | 0.669     | <0.001          | (0.583, 0.755)  |
| <i>secondary forested land</i>                  | 1.015     | <0.001          | (0.941, 1.090)  |
| <i>secondary non-forested land</i>              | 0.118     | <0.001          | (0.075, 0.162)  |
| <b>Biomass features</b>                         |           |                 |                 |
| <i>secondary mean age</i>                       | 0.184     | <0.001          | (0.146, 0.223)  |
| <i>secondary mean biomass carbon density</i>    | 0.237     | <0.001          | (0.171, 0.302)  |

Interpretation: The research hypothesis to test is that "spatial pattern of the rural-urban ambient O<sub>3</sub> differences can be reflected by socio-demographic and geographical features in spatial statistics". Taking the variable "urban land occupation" as an example, the standardised coefficient is positive, as  $\beta_s = 0.086$ , 95% CI: 0.036–0.136, which means summarising from all studied cells across the 30 years, **the greater the urban land occupation is, the larger the rural-urban ambient O<sub>3</sub> gap will be**. This coincides with the fact that greater urban land occupations usually indicate higher emissions to form aerosols, and higher urban aerosols suppress the urban O<sub>3</sub> formation, finally making the rural-urban gaps greater (urban ↓, rural-urban ↑). Relevant characteristics such as urban population fraction ( $\beta=0.144$ , 95% CI: 0.106–0.182), and organic carbon emission ( $\beta=1.379$ , 95% CI: 1.286–1.473) thus also show positive partial correlations. For another example, the coefficient of C<sub>3</sub> annual and perennial crops is also positive as  $\beta_s = 0.201$ , 95% CI: 0.057–0.345. This is a typical rural indicator, meaning that larger C<sub>3</sub> crop vegetated land occupations usually indicate higher biogenic VOC emissions to form rural O<sub>3</sub>, finally making the rural-urban gaps greater (rural ↑, rural-urban ↑). The other studied features can be interpreted in similar way, that emission rate of CO ( $\beta=0.164$ , 95% CI: 0.133–0.195), emission rate of biogenic non-methane VOCs ( $\beta=0.231$ , 95% CI: 0.193–0.270), and other vegetation coverage (e.g. cropland, pasture and rangeland), as rural indicators, also display positive associations with intensified rural O<sub>3</sub> pollution.



**Table S6 | Performance evaluations of phased data fusion with urban-rural distinguishment.**

Algorithm performance assessments include 10-fold cross-validation tests and full-scale overall evaluations separately for urban and rural sites for phased data fusion. Full-scale refers to model training, prediction and evaluation using full dataset. Due to heterogeneity in input data, cross-validation tests for 30-year full-length evaluation are not applicable (NA).

|           |              | Cross-validation test |            | Full-scale evaluation |            | Scale  |
|-----------|--------------|-----------------------|------------|-----------------------|------------|--------|
|           |              | $R^2$                 | RMSE (ppb) | $R^2$                 | RMSE (ppb) |        |
| Phase I   | <i>urban</i> | 0.84                  | 4.2        | 0.93                  | 3.2        | Global |
|           | <i>rural</i> | 0.85                  | 5.1        | 0.90                  | 4.8        | Global |
| Phase II  | <i>urban</i> | 0.88                  | 4.2        | 0.94                  | 3.6        | Global |
|           | <i>rural</i> | 0.90                  | 5.9        | 0.93                  | 5.1        | Global |
| Phase III | <i>urban</i> | 0.82                  | 4.9        | 0.91                  | 4.2        | China  |
|           | <i>rural</i> | 0.86                  | 7.0        | 0.89                  | 5.2        | China  |
| 30-year   | <i>urban</i> | NA                    | NA         | 0.90                  | 3.6        | Global |
|           | <i>rural</i> | NA                    | NA         | 0.93                  | 5.0        | Global |

**Table S7 | Evaluation of spatial and temporal extrapolation accuracy by space-time Bayesian neural network downscaler with urban-rural differentiation.**

Different from classical cross-validation tests by randomly splitting the dataset, spatiotemporal generalisability validation tests manually divide the initial dataset by location or time period. Region-clustered spatial generalisability tests use observations in aggregated regions for algorithm training, and assign observations in other aggregated regions for testing, including four sub-experiments (cross-validation for spatial generalisability, cvs<sub>1</sub>: training on North America, testing on Europe; cvs<sub>2</sub>: training on Europe, testing on North America; cvs<sub>3</sub>: training on North America and Europe, testing on Asia; and cvs<sub>4</sub>: training on locations outside China, testing on China). Period-staged temporal generalisability tests treat six consecutive years as testing subset based on trainings from the rest 24-year global-scale dataset, including five sub-experiments (cross-validation for temporal generalisability, cvt<sub>1</sub>: training on 1990–2013, testing on 2014–2019; cvt<sub>2</sub>: training on 1990–2007 and 2014–2019, testing on 2008–2013; cvt<sub>3</sub>: training on 1990–2001 and 2008–2019, testing on 2002–2007; cvt<sub>4</sub>: training on 1990–1995 and 2002–2019, testing on 1996–2001; cvt<sub>5</sub>: training on 1996–2019, testing on 1990–1995). Prediction evaluation statistics include crude  $R^2$  and RMSE (in ppb) before 1:1 linear regression calibration, together with linear regression slope ( $k$ ) and intercept ( $b$ ).

| Spatial extrapolation  | Urban |            |      |      | Rural |            |      |       |
|------------------------|-------|------------|------|------|-------|------------|------|-------|
|                        | $R^2$ | RMSE (ppb) | $k$  | $b$  | $R^2$ | RMSE (ppb) | $k$  | $b$   |
| cvs <sub>1</sub>       | 0.89  | 6.3        | 0.89 | 4.14 | 0.88  | 6.7        | 0.93 | 4.43  |
| cvs <sub>2</sub>       | 0.89  | 6.0        | 0.92 | 4.28 | 0.86  | 7.3        | 0.88 | 3.66  |
| cvs <sub>3</sub>       | 0.85  | 5.1        | 0.85 | 7.15 | 0.85  | 7.9        | 0.82 | 5.01  |
| cvs <sub>4</sub>       | 0.88  | 4.9        | 0.80 | 9.65 | 0.81  | 6.6        | 0.87 | 2.84  |
| Temporal extrapolation |       |            |      |      |       |            |      |       |
| cvt <sub>1</sub>       | 0.90  | 5.7        | 0.92 | 1.65 | 0.89  | 4.7        | 1.07 | -0.51 |
| cvt <sub>2</sub>       | 0.88  | 5.0        | 0.93 | 1.89 | 0.84  | 5.3        | 1.05 | -0.52 |
| cvt <sub>3</sub>       | 0.91  | 4.9        | 0.92 | 1.44 | 0.84  | 4.6        | 1.02 | -0.53 |
| cvt <sub>4</sub>       | 0.87  | 5.1        | 0.91 | 1.67 | 0.84  | 4.4        | 1.02 | -0.56 |
| cvt <sub>5</sub>       | 0.85  | 4.7        | 0.91 | 1.38 | 0.82  | 4.8        | 1.01 | -0.29 |

**Table S8 | Quality assessment tool for observational cohort and cross-sectional studies.**

---

- A. Was the research question or objective in this paper clearly stated?
- B. Was the study population clearly specified and defined?
- C. Was the participation rate of eligible persons at least 50%?
- D. Were all the subjects selected or recruited from the same or similar populations (including the same time period)? Were inclusion and exclusion criteria for being in the study prespecified and applied uniformly to all participants?
- E. Was a sample size justification, power description, or variance and effect estimates provided?
- F. For the analyses in this paper, were the exposure(s) of interest measured prior to the outcome(s) being measured?
- G. Was the timeframe sufficient so that one could reasonably expect to see an association between exposure and outcome if it existed?
- H. For exposures that can vary in amount or level, did the study examine different levels of the exposure as related to the outcome (e.g., categories of exposure, or exposure measured as continuous variable)?
- I. Were the exposure measures (independent variables) clearly defined, valid, reliable, and implemented consistently across all study participants?
- J. Was the exposure(s) assessed more than once over time?
- K. Were the outcome measures (dependent variables) clearly defined, valid, reliable, and implemented consistently across all study participants?
- L. Were the outcome assessors blinded to the exposure status of participants?
- M. Was loss to follow-up after baseline 20% or less?
- N. Were key potential confounding variables measured and adjusted statistically for their impact on the relationship between exposure(s) and outcome(s)?

---

Source: <https://www.nhlbi.nih.gov/health-topics/study-quality-assessment-tools>.

**Table S9 | Quality assessment of 29 included cohort studies for meta-analysis.**

Study-specific quality assessments aim to examine the reliability of the epidemiological evidence and ensure the quality for meta-analysis. A total of 14 assessment items are considered according to the Quality Assessment Tool of Observational Cohort and Cross-Sectional Studies developed by the National Institute of Health (NIH) (Table S8), and assigned with one score for each, and the tallied scores are translated into a rating of quality. Studies scoring full marks, 14, are categorised as “Good,” 10–13 as “Fair”, and <10 as “Poor.”

| Study                      | A | B | C | D | E | F | G | H | I | J | K | L | M | N | Score | Ref |
|----------------------------|---|---|---|---|---|---|---|---|---|---|---|---|---|---|-------|-----|
| Abbey et al. 1999          | ✓ | ✓ | ✓ | ✓ | ✓ | ✓ | ✓ | ✓ |   | ✓ | ✓ | ✓ | ✓ | ✓ | Fair  | 52  |
| Lipfert et al. 2006        | ✓ | ✓ | ✓ |   | ✓ | ✓ | ✓ | ✓ |   | ✓ | ✓ | ✓ | ✓ | ✓ | Fair  | 53  |
| Jerrett et al. 2009        | ✓ | ✓ | ✓ | ✓ | ✓ | ✓ | ✓ | ✓ |   | ✓ | ✓ | ✓ | ✓ | ✓ | Fair  | 21  |
| Krewski et al. 2009        | ✓ | ✓ | ✓ | ✓ | ✓ |   | ✓ | ✓ |   | ✓ | ✓ | ✓ | ✓ | ✓ | Fair  | 54  |
| Smith et al. 2009          | ✓ | ✓ | ✓ |   | ✓ |   | ✓ | ✓ |   | ✓ | ✓ | ✓ | ✓ | ✓ | Fair  | 55  |
| Lipsett et al. 2011        | ✓ | ✓ | ✓ |   | ✓ | ✓ | ✓ | ✓ |   | ✓ | ✓ | ✓ | ✓ | ✓ | Fair  | 56  |
| Zanobetti et al. 2011      | ✓ | ✓ | ✓ | ✓ | ✓ | ✓ | ✓ | ✓ |   | ✓ | ✓ | ✓ | ✓ | ✓ | Fair  | 57  |
| Carey et al. 2013          | ✓ | ✓ | ✓ |   | ✓ | ✓ |   | ✓ |   | ✓ | ✓ | ✓ | ✓ | ✓ | Fair  | 58  |
| Jerrett et al. 2013        | ✓ | ✓ | ✓ | ✓ | ✓ | ✓ | ✓ | ✓ |   | ✓ | ✓ | ✓ | ✓ | ✓ | Fair  | 59  |
| Bentayeb et al. 2015       | ✓ | ✓ | ✓ |   | ✓ | ✓ | ✓ | ✓ | ✓ | ✓ | ✓ | ✓ | ✓ | ✓ | Fair  | 60  |
| Crouse et al. 2015         | ✓ | ✓ | ✓ |   | ✓ | ✓ | ✓ | ✓ | ✓ | ✓ | ✓ | ✓ | ✓ | ✓ | Fair  | 61  |
| Tonne et al. 2016          | ✓ | ✓ | ✓ | ✓ | ✓ | ✓ | ✓ | ✓ | ✓ | ✓ | ✓ | ✓ | ✓ | ✓ | Good  | 62  |
| Turner et al. 2016         | ✓ | ✓ | ✓ | ✓ | ✓ | ✓ | ✓ | ✓ | ✓ | ✓ | ✓ | ✓ | ✓ | ✓ | Good  | 63  |
| Di et al. 2017             | ✓ | ✓ | ✓ |   | ✓ | ✓ | ✓ | ✓ | ✓ | ✓ | ✓ | ✓ | ✓ | ✓ | Fair  | 64  |
| Weichenthal et al. 2017    | ✓ | ✓ | ✓ | ✓ | ✓ | ✓ | ✓ | ✓ | ✓ | ✓ | ✓ | ✓ | ✓ | ✓ | Good  | 65  |
| Cakmak et al. 2018         | ✓ | ✓ | ✓ | ✓ | ✓ | ✓ | ✓ | ✓ | ✓ | ✓ | ✓ | ✓ | ✓ | ✓ | Good  | 66  |
| Hvidtfeldt et al. 2019     | ✓ | ✓ | ✓ |   | ✓ | ✓ |   | ✓ | ✓ | ✓ | ✓ | ✓ | ✓ | ✓ | Fair  | 67  |
| Kazemiparkouhi et al. 2019 | ✓ | ✓ | ✓ |   | ✓ | ✓ | ✓ | ✓ |   | ✓ | ✓ | ✓ | ✓ | ✓ | Fair  | 68  |
| Lim et al. 2019            | ✓ | ✓ | ✓ | ✓ | ✓ | ✓ | ✓ | ✓ | ✓ | ✓ | ✓ | ✓ | ✓ | ✓ | Good  | 69  |
| Paul et al. 2020           | ✓ | ✓ | ✓ | ✓ | ✓ | ✓ | ✓ | ✓ | ✓ | ✓ | ✓ | ✓ | ✓ | ✓ | Good  | 70  |
| Shi et al. 2021            | ✓ | ✓ | ✓ | ✓ | ✓ | ✓ | ✓ | ✓ | ✓ | ✓ | ✓ | ✓ | ✓ | ✓ | Good  | 71  |
| Strak et al. 2021          | ✓ | ✓ | ✓ | ✓ | ✓ | ✓ | ✓ | ✓ | ✓ | ✓ | ✓ | ✓ | ✓ | ✓ | Good  | 72  |
| Yazdi et al. 2021          | ✓ | ✓ | ✓ | ✓ | ✓ | ✓ | ✓ | ✓ | ✓ | ✓ | ✓ | ✓ | ✓ | ✓ | Good  | 73  |
| Bauwelinck et al. 2022     | ✓ | ✓ | ✓ | ✓ | ✓ | ✓ | ✓ | ✓ | ✓ | ✓ | ✓ | ✓ | ✓ | ✓ | Good  | 74  |
| Stafoggia et al. 2022      | ✓ | ✓ | ✓ | ✓ | ✓ | ✓ | ✓ | ✓ | ✓ | ✓ | ✓ | ✓ | ✓ | ✓ | Good  | 75  |
| So et al. 2022             | ✓ | ✓ | ✓ | ✓ | ✓ | ✓ | ✓ | ✓ | ✓ | ✓ | ✓ | ✓ | ✓ | ✓ | Good  | 76  |
| Liu et al. 2022            | ✓ | ✓ | ✓ | ✓ | ✓ | ✓ | ✓ | ✓ | ✓ | ✓ | ✓ | ✓ | ✓ | ✓ | Good  | 31  |
| Niu et al. 2022            | ✓ | ✓ | ✓ | ✓ | ✓ | ✓ | ✓ | ✓ | ✓ | ✓ | ✓ | ✓ | ✓ | ✓ | Good  | 30  |
| Yuan et al. 2022           | ✓ | ✓ | ✓ | ✓ | ✓ | ✓ | ✓ | ✓ | ✓ | ✓ | ✓ | ✓ | ✓ | ✓ | Good  | 77  |

**Table S10 | GRADE assessment for evidence of ozone-associated mortality risks of NCDs.**

| <b>Domains</b>                     | <b>Assessment</b>                                                                                                                                                                                                           | <b>Rating</b> |
|------------------------------------|-----------------------------------------------------------------------------------------------------------------------------------------------------------------------------------------------------------------------------|---------------|
| Start level                        | All cohort studies.                                                                                                                                                                                                         | High          |
| Risk of bias                       | The overall risk of bias in all cohorts is low.                                                                                                                                                                             | No change     |
| Imprecision                        | All studies included report the 95% confidence interval around the best estimate of the absolute effect.                                                                                                                    | No change     |
| Inconsistency                      | The values of effect sizes across the studies are inconsistent, as the point estimates are in the range of 0.816 to 1.108.                                                                                                  | Downgrade     |
| Indirectness                       | All studies include the desired population, exposures and outcomes.                                                                                                                                                         | No change     |
| Publication bias                   | The trim-and-fill tool detects 1 study (Yuan et al. 2022) reporting significant positive publication bias, which is excluded in censored meta-analysis. The publication bias for censored meta-analysis is non-significant. | No change     |
| Magnitude of associations          | The magnitude of effect sizes is not large enough to upgrade the level of evidence.                                                                                                                                         | No change     |
| Dose-response trend                | Linear dose-response relationships are assumed in all studies, and at least 4 studies after censoring (Di et al. 2017, Shi et al. 2021, Bauwelinck et al. 2022, and So et al. 2022) have checked the dose-response trends.  | Upgrade       |
| Plausible confounding towards null | Cakmak et al. 2018 reports higher RR after adjusting confounders; but 1 study out of 29 reporting plausible confounding is not sufficient for an upgrading.                                                                 | No change     |
| <b>Overall Judgment</b>            |                                                                                                                                                                                                                             | <b>High</b>   |

**Table S11 | GRADE assessment for evidence of ozone-associated mortality risks of CRDs.**

| <b>Domains</b>                     | <b>Assessment</b>                                                                                                                                                                                        | <b>Rating</b> |
|------------------------------------|----------------------------------------------------------------------------------------------------------------------------------------------------------------------------------------------------------|---------------|
| Start level                        | All cohort studies.                                                                                                                                                                                      | High          |
| Risk of bias                       | The overall risk of bias in all cohorts is low.                                                                                                                                                          | No change     |
| Imprecision                        | All studies included report the 95% confidence interval around the best estimate of the absolute effect.                                                                                                 | No change     |
| Inconsistency                      | The values of effect sizes across the studies are inconsistent, as the point estimates are in the range of 0.782 to 1.144                                                                                | Downgrade     |
| Indirectness                       | All studies include the desired population, exposures and outcomes.                                                                                                                                      | No change     |
| Publication bias                   | The publication bias for censored meta-analysis is non-significant.                                                                                                                                      | No change     |
| Magnitude of associations          | The magnitude of effect sizes is not large enough to upgrade the level of evidence.                                                                                                                      | No change     |
| Dose-response trend                | Linear dose-response relationships are assumed in all studies, and at least 3 out of 11 censored studies (Lim et al. 2019, Bauwelinck et al. 2022, and So et al. 2022) have tested dose-response trends. | Upgrade       |
| Plausible confounding towards null | No crude and adjusted risks are provided for each study.                                                                                                                                                 | No change     |
| <b>Overall Judgment</b>            |                                                                                                                                                                                                          | <b>High</b>   |

**Table S12 | GRADE assessment for evidence of ozone-associated mortality risks of COPD.**

| <b>Domains</b>                     | <b>Assessment</b>                                                                                                          | <b>Rating</b> |
|------------------------------------|----------------------------------------------------------------------------------------------------------------------------|---------------|
| Start level                        | All cohort studies.                                                                                                        | High          |
| Risk of bias                       | The overall risk of bias in all cohorts is low.                                                                            | No change     |
| Imprecision                        | All studies included report the 95% confidence interval around the best estimate of the absolute effect.                   | No change     |
| Inconsistency                      | The values of effect sizes across the studies are inconsistent, as the point estimates are in the range of 0.746 to 1.090. | Downgrade     |
| Indirectness                       | All studies include the desired population, exposures and outcomes.                                                        | No change     |
| Publication bias                   | The publication bias for censored meta-analysis is non-significant.                                                        | No change     |
| Magnitude of associations          | The magnitude of effect sizes (RR=1.060, 95% CI: 1.040–1.080) can be considered to upgrade the level of evidence.          | Upgrade       |
| Dose-response trend                | Linear dose-response relationships are assumed in all studies, but no studies check dose-response trends.                  | No change     |
| Plausible confounding towards null | No crude and adjusted risks are provided for each study.                                                                   | No change     |
| <b>Overall Judgment</b>            |                                                                                                                            | <b>High</b>   |



**Table S13 | GRADE assessment for evidence of ozone-associated mortality risks of CVDs.**

| <b>Domains</b>                     | <b>Assessment</b>                                                                                                                                                                                                                                                           | <b>Rating</b> |
|------------------------------------|-----------------------------------------------------------------------------------------------------------------------------------------------------------------------------------------------------------------------------------------------------------------------------|---------------|
| Start level                        | All cohort studies.                                                                                                                                                                                                                                                         | High          |
| Risk of bias                       | The overall risk of bias in all cohorts is low.                                                                                                                                                                                                                             | No change     |
| Imprecision                        | All studies included report the 95% confidence interval around the best estimate of the absolute effect.                                                                                                                                                                    | No change     |
| Inconsistency                      | The values of effect sizes across the studies are inconsistent, as the point estimates are in the range of 0.831 to 1.249.                                                                                                                                                  | Downgrade     |
| Indirectness                       | All studies include the desired population, exposures and outcomes.                                                                                                                                                                                                         | No change     |
| Publication bias                   | The publication bias for censored meta-analysis is non-significant.                                                                                                                                                                                                         | No change     |
| Magnitude of associations          | The magnitude of effect sizes is not large enough to upgrade the level of evidence.                                                                                                                                                                                         | No change     |
| Dose-response trend                | Linear dose-response relationships are assumed in all studies, and at least 7 out of 15 studies (Lim et al. 2019, Paul et al. 2020, Strak et al. 2021, Bauwelinck et al. 2022, So et al. 2022, Liu et al. 2022, and Niu et al. 2022) have checked the dose-response trends. | Upgrade       |
| Plausible confounding towards null | No crude and adjusted risks are provided for each study.                                                                                                                                                                                                                    | No change     |
| <b>Overall Judgment</b>            |                                                                                                                                                                                                                                                                             | <b>High</b>   |

**Table S14 | GRADE assessment for evidence of ozone-associated mortality risks of IHD.**

| <b>Domains</b>                     | <b>Assessment</b>                                                                                                                                                                                       | <b>Rating</b> |
|------------------------------------|---------------------------------------------------------------------------------------------------------------------------------------------------------------------------------------------------------|---------------|
| Start level                        | All cohort studies.                                                                                                                                                                                     | High          |
| Risk of bias                       | The overall risk of bias in all cohorts is low.                                                                                                                                                         | No change     |
| Imprecision                        | All studies included report the 95% confidence interval around the best estimate of the absolute effect.                                                                                                | No change     |
| Inconsistency                      | The values of effect sizes across the studies are inconsistent, as the point estimates are in the range of 0.761 to 1.360.                                                                              | Downgrade     |
| Indirectness                       | All studies include the desired population, exposures and outcomes.                                                                                                                                     | No change     |
| Publication bias                   | The publication bias for censored meta-analysis is non-significant.                                                                                                                                     | No change     |
| Magnitude of associations          | The magnitude of effect sizes is not large enough to upgrade the level of evidence.                                                                                                                     | No change     |
| Dose-response trend                | Linear dose-response relationships are assumed in all studies, and at least 3 (Strak et al. 2021, Liu et al. 2022, and Niu et al. 2022) out of 8 censored studies have considered dose-response trends. | Upgrade       |
| Plausible confounding towards null | Cakmak et al. 2018 reports higher RR after adjusting confounders; but 1 study reporting plausible confounding is not sufficient for an upgrading.                                                       | No change     |
| <b>Overall Judgment</b>            |                                                                                                                                                                                                         | <b>High</b>   |

**Table S15 | Statistically resampled distributions of ozone exposure levels for each study.**

The distribution features include arithmetic mean, standard deviation (SD), minimum, 5<sup>th</sup>, 25<sup>th</sup>, 50<sup>th</sup> (median), 75<sup>th</sup>, and 95<sup>th</sup> percentile, maximum, inter-quartile range (IQR), and full range, based on ozone exposure concentrations scaled by OSDMA8 metric in ppb. Values in **Bold** font represent the statistics reported by literature, while the rest indicate imputed values. Detailed resampling procedures and imputation accuracy evaluation can be found in a previous study<sup>14</sup>.

| Study                      | Mean | SD   | Min  | 5%   | 25%  | Median | 75%  | 95%  | Max   | IQR  | Range |
|----------------------------|------|------|------|------|------|--------|------|------|-------|------|-------|
| Abbey et al. 1999          | 50.4 | 14.9 | 16.1 | 26.1 | 40.6 | 50.4   | 60.5 | 74.8 | 84.9  | 23.2 | 84.9  |
| Lipfert et al. 2006        | 80.1 | 9.7  | 36.6 | 64.2 | 73.5 | 80.1   | 86.7 | 96.1 | 106.6 | 13.2 | 69.9  |
| Jerrett et al. 2009        |      |      |      |      |      |        |      |      |       |      |       |
| Krewski et al. 2009        | 50.1 | 12.6 | 27.5 | 30.0 | 41.6 | 50.1   | 58.5 | 70.7 | 86.1  | 17.0 | 58.5  |
| Smith et al. 2009          |      |      |      |      |      |        |      |      |       |      |       |
| Lipsett et al. 2011        | 55.6 | 10.1 | 29.4 | 39.1 | 48.8 | 55.6   | 62.4 | 72.3 | 95.5  | 12.9 | 66.1  |
| Zanobetti et al. 2011      | 45.9 | 5.2  | 26.6 | 40.1 | 44.0 | 48.4   | 51.1 | 52.5 | 71.2  | 6.9  | 44.7  |
| Carey et al. 2013          | 51.0 | 2.3  | 43.8 | 47.2 | 49.5 | 51.0   | 52.6 | 54.9 | 62.0  | 2.9  | 18.1  |
| Jerrett et al. 2013        | 58.3 | 16.9 | 19.8 | 33.3 | 42.5 | 58.7   | 70.5 | 85.8 | 103.2 | 28.0 | 83.5  |
| Bentayeb et al. 2015       | 49.4 | 4.9  | 20.3 | 25.4 | 45.5 | 48.9   | 52.1 | 57.0 | 60.2  | 6.2  | 39.9  |
| Crouse et al. 2015         | 39.5 | 7.3  | 10.7 | 26.8 | 34.2 | 39.0   | 44.0 | 51.0 | 59.9  | 9.8  | 49.1  |
| Tonne et al. 2016          | 39.8 | 3.8  | 30.7 | 33.4 | 37.3 | 40.0   | 42.5 | 46.4 | 49.0  | 5.2  | 18.4  |
| Turner et al. 2016         | 44.2 | 4.6  | 30.1 | 36.5 | 41.0 | 44.2   | 47.3 | 51.8 | 68.6  | 6.2  | 37.7  |
| Di et al. 2017             | 46.3 | 9.9  | 54.0 | 36.3 | 70.5 | 77.1   | 83.8 | 55.9 | 100.2 | 13.3 | 46.1  |
| Weichenenthal et al. 2017  | 38.1 | 6.6  | 1.0  | 27.5 | 33.6 | 38.0   | 42.5 | 50.4 | 60.3  | 9.0  | 59.3  |
| Cakmak et al. 2018         | 39.1 | 6.7  | 0.0  | 28.1 | 34.6 | 39.1   | 43.6 | 50.1 | 58.6  | 9.0  | 58.6  |
| Hvidtfeldt et al. 2019     | 54.7 | 4.9  | 43.5 | 44.0 | 51.3 | 54.7   | 57.8 | 59.9 | 65.9  | 6.6  | 22.4  |
| Kazemiparkouhi et al. 2019 | 45.1 | 5.3  | 31.0 | 36.3 | 41.5 | 45.1   | 48.7 | 53.9 | 65.1  | 7.2  | 34.1  |
| Lim et al. 2019            | 45.5 | 6.1  | 31.3 | 35.4 | 41.4 | 45.5   | 49.7 | 55.6 | 59.8  | 8.3  | 28.6  |
| Paul et al. 2020           | 46.8 | 4.7  | 35.8 | 39.0 | 43.6 | 46.8   | 49.9 | 54.6 | 57.8  | 6.4  | 22.0  |
| Shi et al. 2021            | 40.2 | 4.8  | 17.9 | 30.5 | 37.5 | 40.9   | 43.3 | 47.2 | 50.0  | 5.8  | 32.1  |
| Strak et al. 2021          | 43.5 | 4.6  | 18.5 | 36.0 | 40.1 | 44.0   | 47.3 | 49.7 | 58.9  | 7.2  | 40.4  |
| Yazdi et al. 2021          | 41.9 | 3.9  | 31.9 | 35.5 | 39.4 | 42.5   | 44.7 | 48.3 | 50.0  | 5.3  | 18.1  |
| Bauwelinck et al. 2022     | 39.5 | 1.6  | 19.8 | 34.9 | 38.3 | 39.5   | 40.5 | 42.6 | 46.4  | 2.2  | 26.7  |
| So et al. 2022             | 40.9 | 2.2  | 24.9 | 36.0 | 40.1 | 41.4   | 42.2 | 43.5 | 46.9  | 2.1  | 22.0  |
| Liu et al. 2022            | 37.4 | 1.2  | 33.7 | 35.4 | 36.6 | 37.4   | 38.2 | 39.4 | 43.0  | 1.6  | 9.3   |
| Niu et al. 2022            | 45.8 | 7.3  | 28.8 | 33.8 | 40.9 | 45.8   | 50.7 | 57.8 | 62.8  | 9.8  | 34.0  |
| Yuan et al. 2022           | 51.4 | 9.0  | 31.0 | 36.7 | 45.4 | 51.4   | 57.4 | 66.1 | 72.7  | 12.0 | 41.7  |

Note: Jerrett et al. 2009 did not report the arithmetic mean and standard deviation directly. The values were derived by weighted averaging the centric concentrations of 4 exposure intervals on the populations given in Table 1 from the original literature. Zanobetti et al. 2011 did not provide the exposure distribution features directly. The quartiles were extracted from the legends in Fig. 1 of the original literature.

Methods: To reproduce the distribution, the arithmetic means and standard deviations ( $\sigma$ ) were firstly extracted from literatures included for meta-analysis; if unavailable, the arithmetic means and standard deviations were estimated based on the reported descriptive statistics including median, first- and third-quartile, and all the other percentiles, to finally identify the parameters for presumed Gaussian normal distribution. Reported values were always treated as priority when divergences with estimations occurred. The centric level, arithmetic mean and median, were treated as exchangeable, but the arithmetic means were preferred. Theoretically, the minimum and maximum values of the distribution were not predictable, and thus 1<sup>st</sup> and 99<sup>th</sup> percentiles were used as proxies. Calculations for  $\sigma$  from key percentiles followed: 75<sup>th</sup>ile = mean + 0.6745  $\sigma$ , 95<sup>th</sup>ile = mean + 1.6449  $\sigma$ , and 99<sup>th</sup>ile = mean + 2.3263  $\sigma$ . If IQRs were stated, then IQR = 1.3490  $\sigma$ ; if the 5–95<sup>th</sup> percentile ranges were reported, then range<sub>5-95</sub> = 3.2898  $\sigma$ ; if full minimum-maximum ranges were given, then range = 4.6527  $\sigma$ . If more than one distribution features were provided, IQRs were more preferred for  $\sigma$  estimation due to higher robustness.

**Table S16 | Evaluations of accuracies of deep-learning-based data assimilation with (ScA) and without (ScB) satellite-based remote-sensing measurements and chemical reanalysis outputs.**

Accuracy evaluations include coefficient of determination ( $R^2$ ) and root-mean-square error (RMSE, ppb) for 10-fold cross-validation tests using 70% observation-matched dataset by random split, external validation tests using 30% dataset, and overall model fitting for the two scenarios respectively. Given systematic *in situ* observations were unavailable in earlier years of China, and CNEMC sites were allocated in urban and rural environments disproportionally, model fitting and performance evaluations are conducted on global scale.

| Evaluation Metrics             | ScA   | ScB   |
|--------------------------------|-------|-------|
| Cross-validation $R^2$         | 0.883 | 0.882 |
| Cross-validation RMSE (ppb)    | 3.887 | 3.876 |
| External validation $R^2$      | 0.885 | 0.883 |
| External validation RMSE (ppb) | 3.879 | 3.868 |
| Overall fitting $R^2$          | 0.969 | 0.968 |
| Overall fitting RMSE (ppb)     | 2.550 | 2.542 |

**Table S17 | Multi-scenario sensitivity analysis.**

Sensitivity analyses are conducted on the estimation for 2017 as an example by multiple designed scenarios (Sc) beyond the main analysis. Cardiopulmonary mortality numbers are estimated for urban and rural population separately. Changes in total population mortalities (%) for different scenarios against the main analysis results are calculated. **Sc1:** Using log-linear risk model (rather than curved risk model in main analysis) with multi-study pooled RRs by random-effects meta-analysis, assuming threshold exposure level (also known as TMREL or low-concentration cut-off) as the global lowest 5<sup>th</sup> percentile PWE in 2017 by BayNNDv2 dataset (see Method S1), 42.6 ppb. **Sc2:** Using log-linear risk model assuming threshold as the 30-year global lowest 5<sup>th</sup> percentile PWE by BayNNDv2 dataset, 40.8 ppb. **Sc3:** Using log-linear risk model assuming threshold as the maximum of literature-reported lowest 5<sup>th</sup> percentile exposure levels from studies included for meta-analysis, 44.0 ppb. **Sc4:** Using grid-averaged ambient ozone concentrations to quantify population exposure (following a previous study<sup>1</sup>), supposing the ambient ozone concentrations are not distinguished for urban and rural environments. **Sc5:** Using gender-specified other than the gender-standardised mortality metrics provided by IHME<sup>15</sup> (GBD 2019 Study report). **Sc6:** Using province-specific mortality metrics for 2017 provided by China CDC<sup>29</sup>, as the cause-specific mortality rates are proportionally converted from the estimated DALY (disability-adjusted life years) rates. **Sc7:** Using M<sup>3</sup>-BME ambient ozone tracking data product instead of the fused one. As M<sup>3</sup>-BME did not distinguish urban and rural ozone, urban and rural mortalities were not applicable (NA). **Sc8:** Using cardiovascular mortality linear risk association (RR=1.227, 95% CI: 1.108–1.359) pooled from two cohort studies exclusively on Chinese population<sup>73,74</sup>.

| Scenarios   | Urban Mortality (thousand) | Rural Mortality (thousand) | Total Mortality (thousand) | Change (%)             |
|-------------|----------------------------|----------------------------|----------------------------|------------------------|
| Main Result | 191.2 (123.6 to 260.0)     | 172.5 (111.4 to 234.9)     | 363.7 (235.0 to 495.0)     | Ref.                   |
| Sc1         | 179.1 (113.0 to 248.9)     | 160.0 (100.8 to 222.6)     | 339.1 (213.8 to 471.5)     | -6.74 (-8.99 to -4.74) |
| Sc2         | 188.5 (119.0 to 261.8)     | 168.3 (106.1 to 234.0)     | 356.8 (225.1 to 495.8)     | -1.88 (-4.18 to 0.16)  |
| Sc3         | 173.4 (109.3 to 241.1)     | 155.1 (97.6 to 215.8)      | 328.5 (207.0 to 456.9)     | -9.66 (-11.9 to -7.68) |
| Sc4         | 189.9 (119.9 to 263.8)     | 137.8 (86.7 to 192.0)      | 327.8 (206.6 to 455.8)     | -9.88 (-12.1 to -7.91) |
| Sc5         | 195.0 (119.3 to 275.5)     | 176.0 (107.5 to 248.9)     | 371.0 (226.8 to 524.3)     | 2.01 (-3.45 to 5.93)   |
| Sc6         | 201.0 (127.7 to 279.9)     | 181.4 (115.1 to 252.9)     | 382.4 (242.7 to 532.8)     | 5.15 ( 3.31 to 7.65)   |
| Sc7         | NA                         | NA                         | 332.5 (212.9 to 460.6)     | -8.58 (-9.40 to -6.94) |
| Sc8         | 211.1 (129.6 to 293.3)     | 190.5 (116.8 to 265.0)     | 401.6 (246.4 to 558.3)     | 10.4 ( 4.85 to 12.8)   |

## SUPPLEMENTARY FIGURES

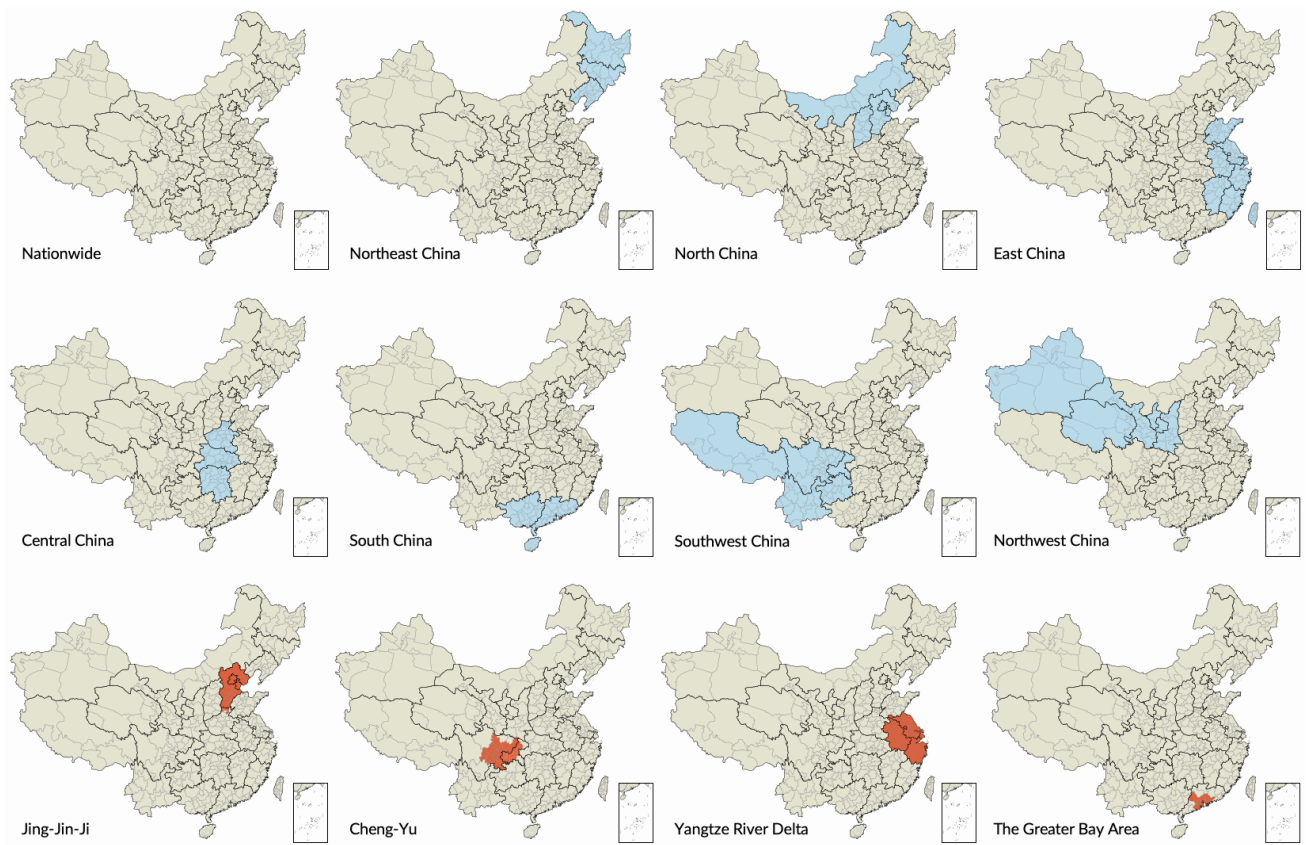

Figure S1 | Mapping of 7 Chinese administrative divisions and 4 megalopolises.

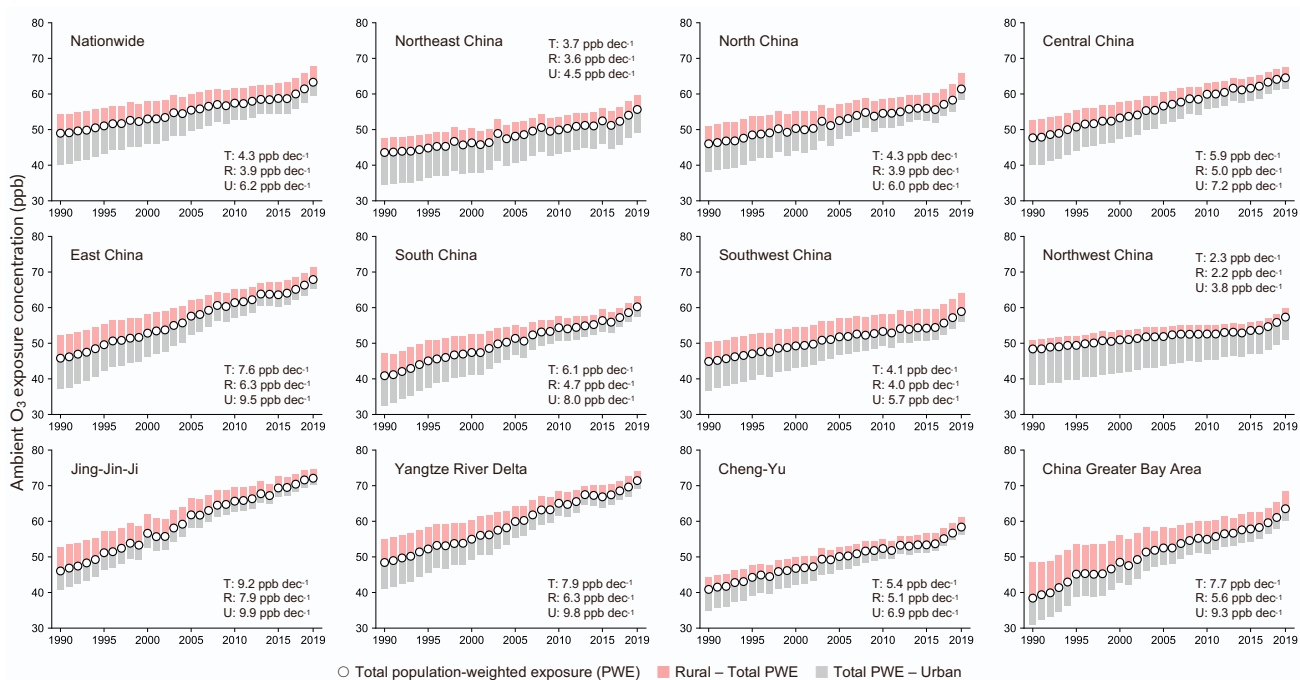

**Figure S2 | Nationwide and regional 30-year longitudinal trends of ambient ozone exposure.**

Population-weighted exposure (PWE) of total, rural- and urban-specified average exposure levels to ambient ozone are scaled in metric of OSDMA8. PWE levels are indicated by circles, based on which the rural-total (defined as rural-population average minus total PWE, similarly hereinafter) and total-urban differences are marked with directional bars. Upper apexes and lower vertexes represent nationwide or regional average ambient ozone exposure concentrations for rural and urban residents, respectively. Decadal average increasing rates (ppb per decade) are estimated by generalised linear model, as inserted in each subplot (T for total PWE; R for rural population exposure levels; U for urban population exposure levels). Longitudinal trends are summarised for nationwide, 7 geographical divisions, and 4 megalopolises (see Figure S1 for detailed definition).



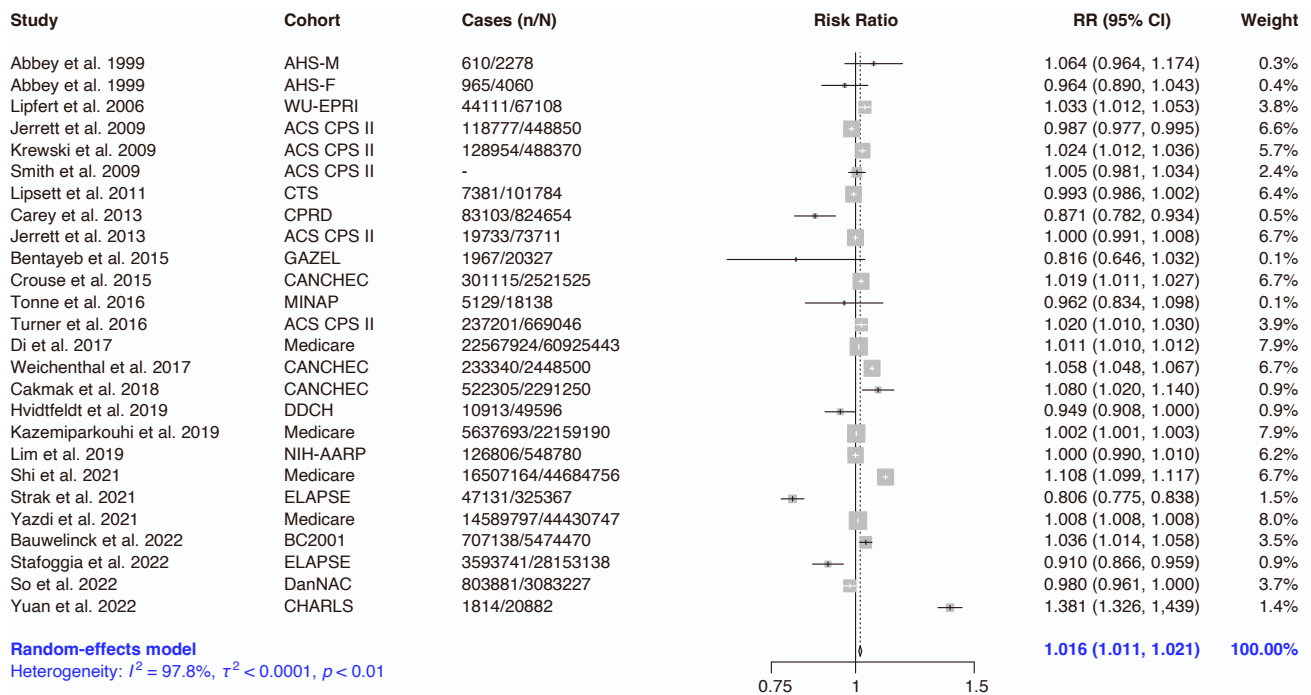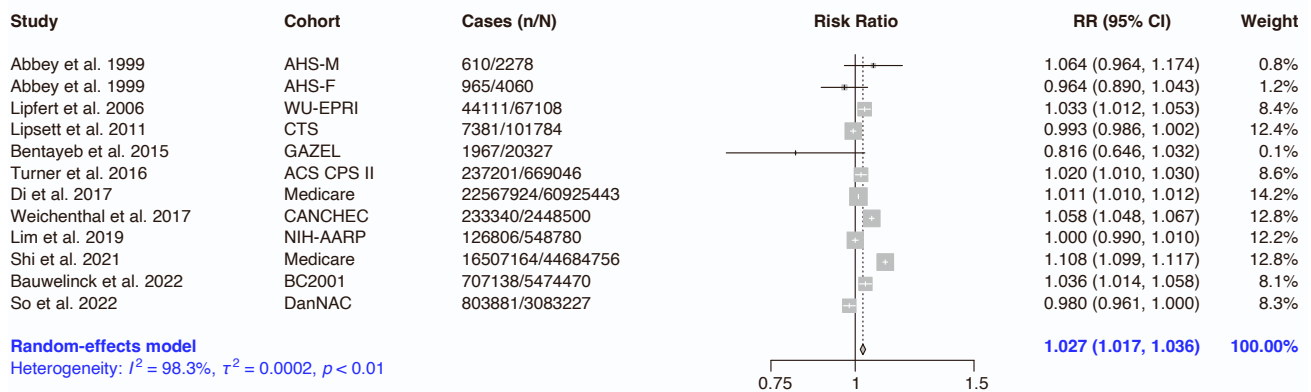

**Figure S3 | Multi-study pooled mortality RR of NCDs associated with long-term ozone exposure.**

Risk strengths are defined as RRs per 10-ppb incremental exposure by OSDMA8 metric. The upper panel displays the meta-analysis results for all relevant cohort studies identified from systematic review, and the lower panel, censored meta-analysis, excludes i) studies conducted from the same cohort; ii) studies using over-smoothed metrics (e.g. 24-hour average) to quantify the individual-level exposure; iii) studies showing significant publication bias by trim-and-fill test (Figure S8); and iv) studies in which ozone hazards are mistakenly confounded by correlated or anticorrelated air pollutant species (e.g. NO<sub>2</sub>). For cohort duplication censoring, only one study covering the widest population is reserved in principle; unless different participant inclusion criteria are clearly stated (e.g. Di et al.<sup>64</sup> conducted study on the whole Medicare cohort participants while Shi et al.<sup>71</sup> focused on the low-exposure participants, thus both included for meta-analysis). Methodology of metric and unit unification has been illustrated in a previous review<sup>14</sup>. Supplementary Figs. 4-7 follow the same configuration.

| Study                      | Cohort     | Cases (n/N)     | Risk Ratio | RR (95% CI)          | Weight |
|----------------------------|------------|-----------------|------------|----------------------|--------|
| Abbey et al. 1999          | AHS-M      | 63/2278         |            | 1.085 (0.890, 1.319) | 0.5%   |
| Abbey et al. 1999          | AHS-F      | 72/4060         |            | 1.036 (0.867, 1.241) | 0.6%   |
| Jerrett et al. 2009        | ACS CPS II | 9819/448850     |            | 1.048 (1.016, 1.081) | 8.1%   |
| Smith et al. 2009          | ACS CPS II | -               |            | 1.144 (1.048, 1.247) | 2.3%   |
| Lipsett et al. 2011        | CTS        | 702/101784      |            | 1.020 (0.993, 1.044) | 9.5%   |
| Carey et al. 2013          | CPRD       | 10583/824654    |            | 0.782 (0.699, 0.871) | 1.6%   |
| Jerrett et al. 2013        | ACS CPS II | 1973/73711      |            | 1.004 (0.978, 1.030) | 8.5%   |
| Bentayeb et al. 2015       | GAZEL      | 284/20327       |            | 0.953 (0.554, 1.671) | 0.1%   |
| Crouse et al. 2015         | CANCHEC    | 24900/2521525   |            | 0.980 (0.953, 1.007) | 8.7%   |
| Turner et al. 2016         | ACS CPS II | 20484/669046    |            | 1.080 (1.060, 1.110) | 8.2%   |
| Weichenthal et al. 2017    | CANCHEC    | 21100/2448500   |            | 1.041 (1.011, 1.070) | 8.7%   |
| Hvidtfeldt et al. 2019     | DDCH       | 2093/49596      |            | 0.970 (0.888, 1.051) | 2.6%   |
| Kazemiparkouhi et al. 2019 | Medicare   | 633216/22159190 |            | 1.033 (1.030, 1.037) | 12.6%  |
| Lim et al. 2019            | NIH-AARP   | 12459/548780    |            | 1.040 (1.000, 1.080) | 6.8%   |
| Strak et al. 2021          | ELAPSE     | 2865/325367     |            | 0.796 (0.679, 0.934) | 6.2%   |
| Bauwelinck et al. 2022     | BC2001     | 82341/5474470   |            | 1.062 (1.014, 1.111) | 5.7%   |
| Stafoggia et al. 2022      | ELAPSE     | 371990/28153138 |            | 0.901 (0.831, 0.977) | 2.6%   |
| So et al. 2022             | DanNAC     | 223553/3083227  |            | 1.020 (0.982, 1.060) | 6.7%   |

**Random-effects model**  
Heterogeneity:  $I^2 = 84.9\%$ ,  $\tau^2 = 0.0004$ ,  $p < 0.01$

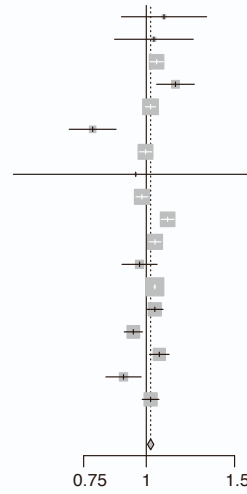

| Study                      | Cohort     | Cases (n/N)     | Risk Ratio | RR (95% CI)          | Weight |
|----------------------------|------------|-----------------|------------|----------------------|--------|
| Abbey et al. 1999          | AHS-M      | 63/2278         |            | 1.085 (0.890, 1.319) | 0.4%   |
| Abbey et al. 1999          | AHS-F      | 72/4060         |            | 1.036 (0.867, 1.241) | 0.5%   |
| Smith et al. 2009          | ACS CPS II | -               |            | 1.144 (1.048, 1.247) | 1.9%   |
| Lipsett et al. 2011        | CTS        | 702/101784      |            | 1.020 (0.993, 1.044) | 13.9%  |
| Carey et al. 2013          | CPRD       | 10583/824654    |            | 0.782 (0.699, 0.871) | 1.2%   |
| Bentayeb et al. 2015       | GAZEL      | 284/20327       |            | 0.953 (0.554, 1.671) | 0.1%   |
| Turner et al. 2016         | ACS CPS II | 20484/669046    |            | 1.080 (1.060, 1.110) | 11.0%  |
| Weichenthal et al. 2017    | CANCHEC    | 21100/2448500   |            | 1.041 (1.011, 1.070) | 12.4%  |
| Kazemiparkouhi et al. 2019 | Medicare   | 633216/22159190 |            | 1.033 (1.030, 1.037) | 37.2%  |
| Lim et al. 2019            | NIH-AARP   | 12459/548780    |            | 1.040 (1.000, 1.080) | 7.9%   |
| Bauwelinck et al. 2022     | BC2001     | 82341/5474470   |            | 1.062 (1.014, 1.111) | 6.0%   |
| So et al. 2022             | DanNAC     | 223553/3083227  |            | 1.020 (0.982, 1.060) | 7.6%   |

**Random-effects model**  
Heterogeneity:  $I^2 = 76.8\%$ ,  $\tau^2 = 0.0001$ ,  $p < 0.01$

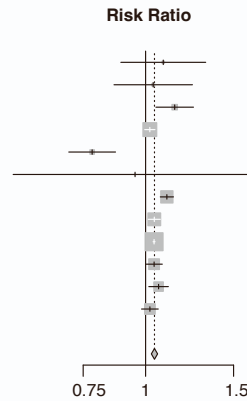

**Figure S4 | Multi-study pooled mortality RR of CRDs associated with ozone exposure.**

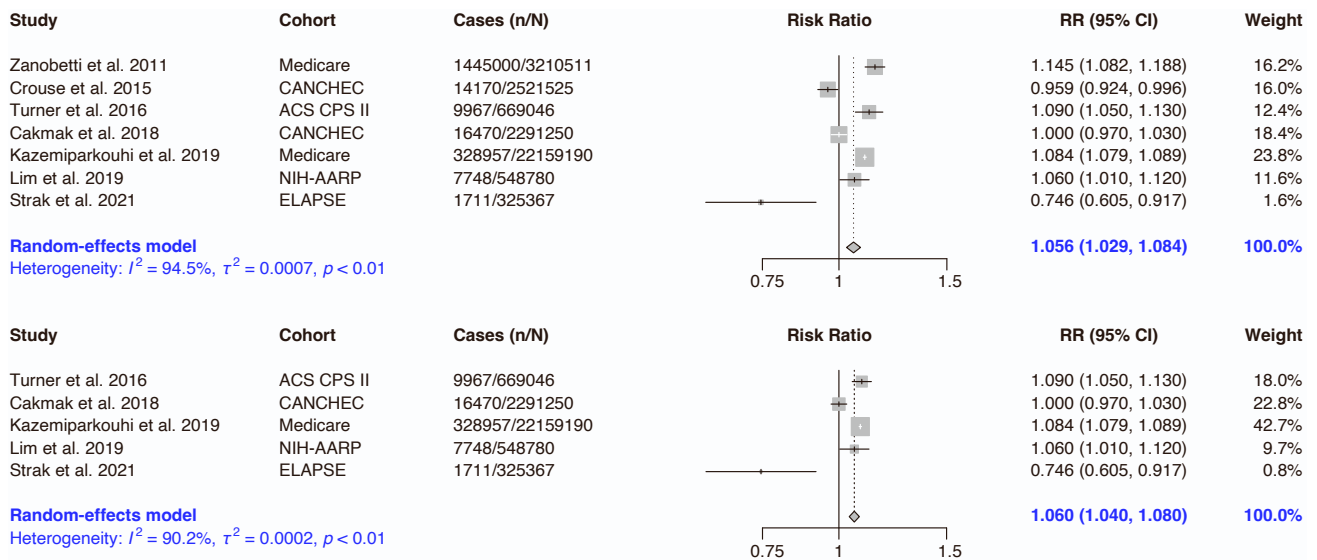

Figure S5 | Multi-study pooled mortality RR of COPD associated with ozone exposure.

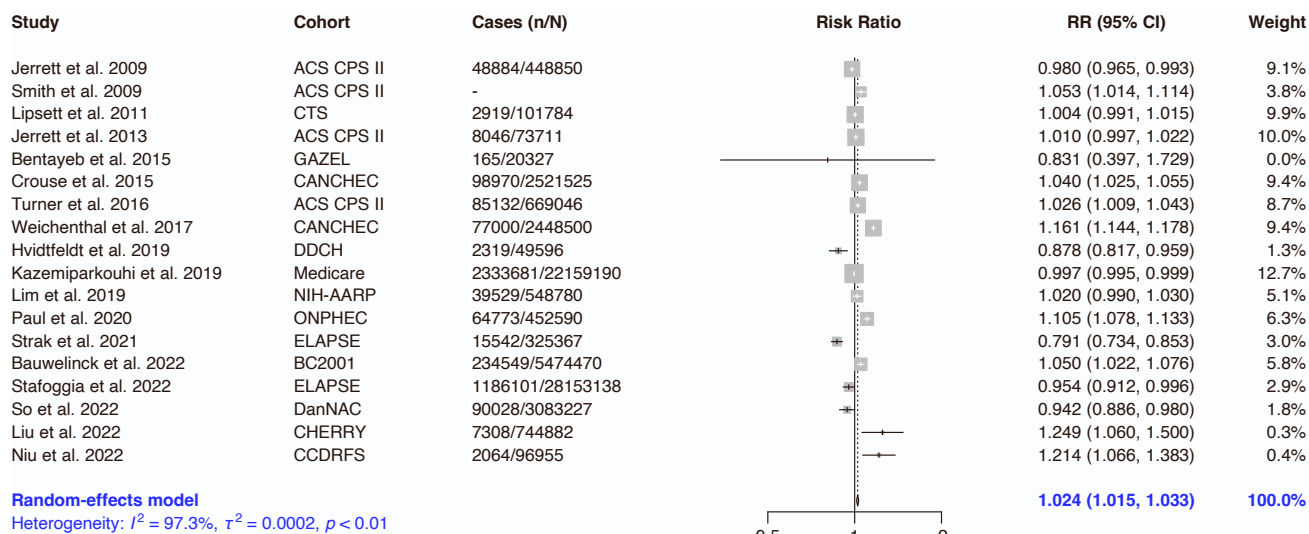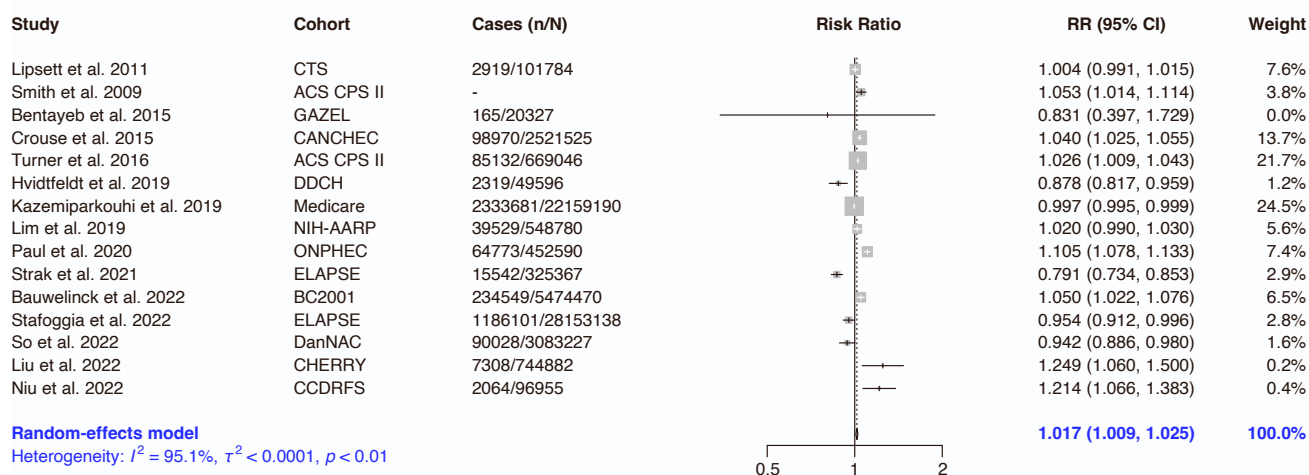

Figure S6 | Multi-study pooled mortality RR of CVDs associated with ozone exposure.

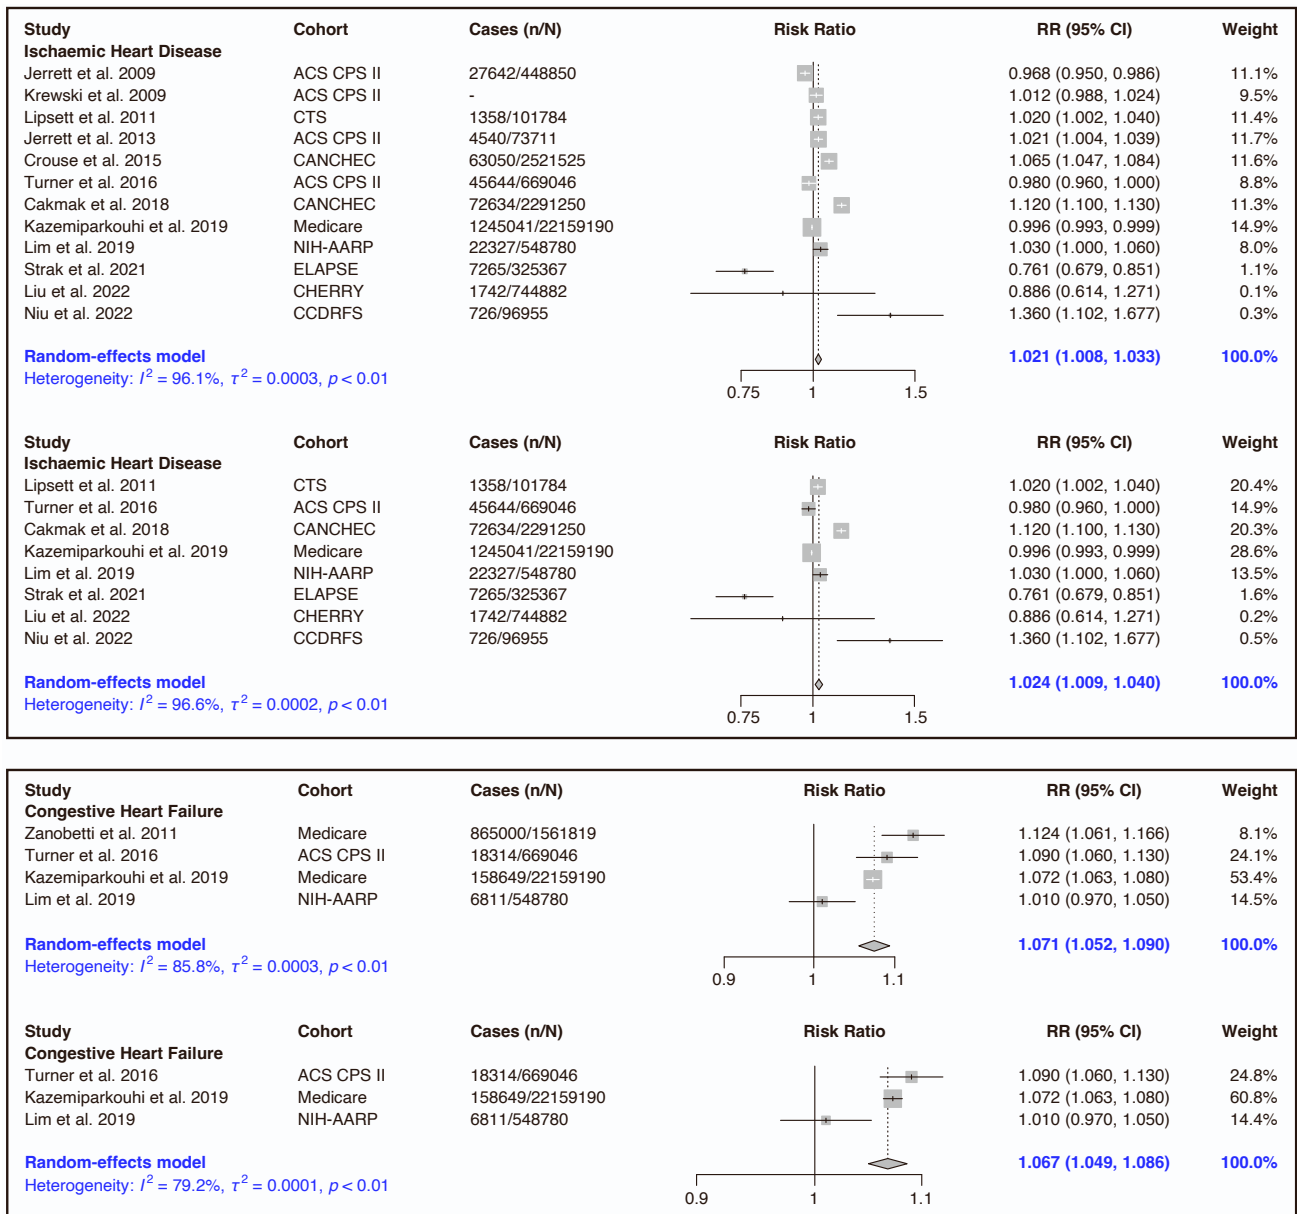

Figure S7 | Multi-study pooled mortality RR of IHD and CHF associated with ozone exposure.

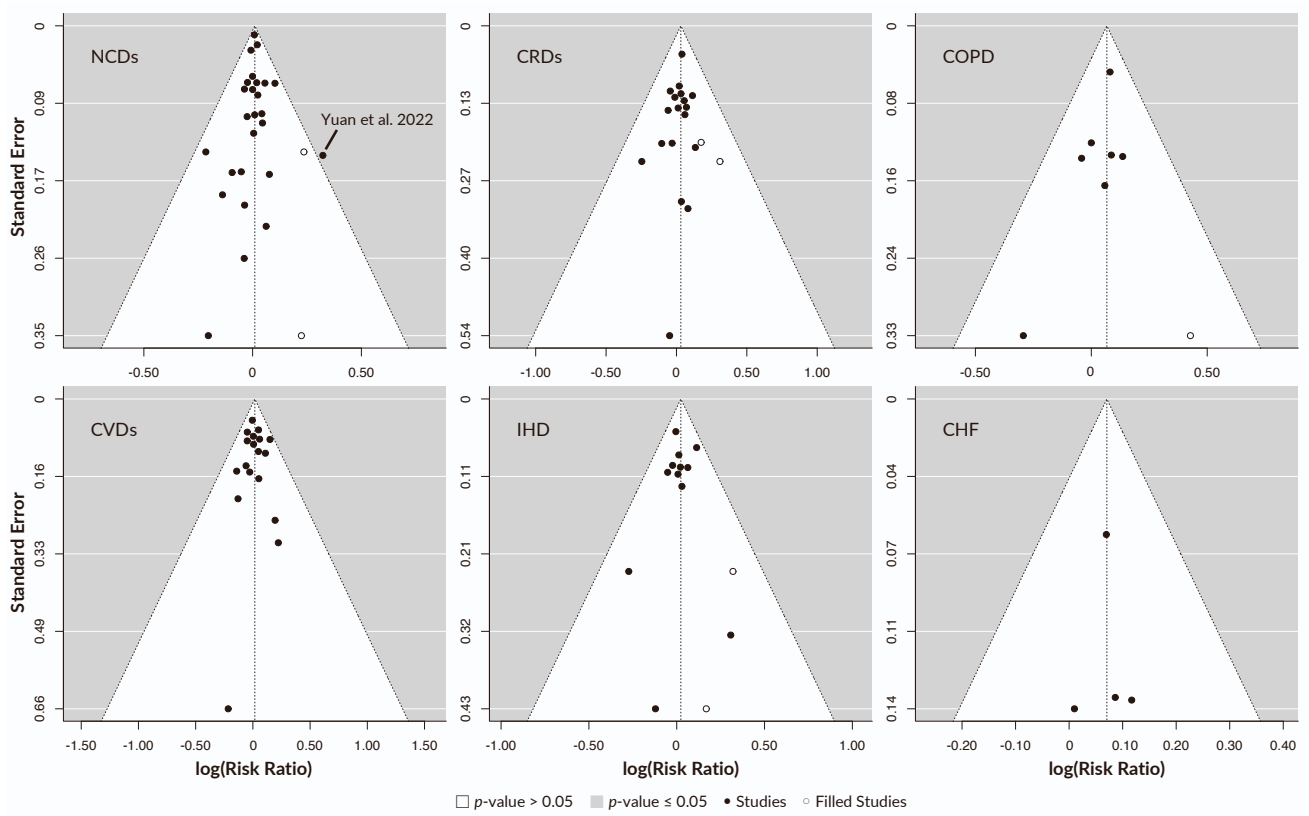

**Figure S8 | Examination of publication biases by trim-and-fill method.**

Scatter points are jittered appropriately to avoid excessive overlap.

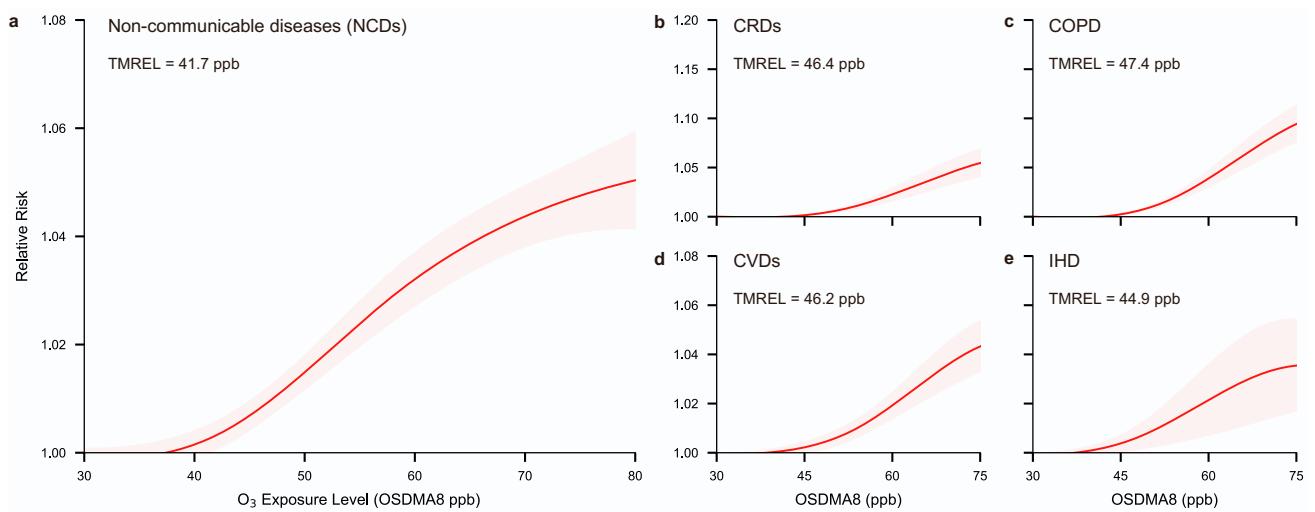

**Figure S9 | Multi-study pooled ozone-associated RR curves of multi-cause mortality.**

The exposure-response (ER) curves are estimated for (a) ozone-associated mortality risks of non-communicable diseases (NCDs), (b) chronic respiratory diseases (CRDs), (c) chronic obstructive pulmonary disease (COPD), (d) cardiovascular diseases (CVDs), and (e) ischaemic heart disease (IHD) by mean of exposure range resampled meta-regression, Bayesian, regularised, and trimmed (MR-BRT). Exposures are quantified by 6-month (April–September) ozone-season 8-hour daily maximum average (OSDMA8) metric in ppb. Meta-regressions are performed on censored epidemiological evidence removing studies on duplicated cohort, unless the ER curved are clearly reported in the original literatures. Threshold exposure levels, also known as theoretical minimum risk exposure levels (TMREL), are indicated in each panel. The curved relative risks are used for mortality estimations as main analyses.

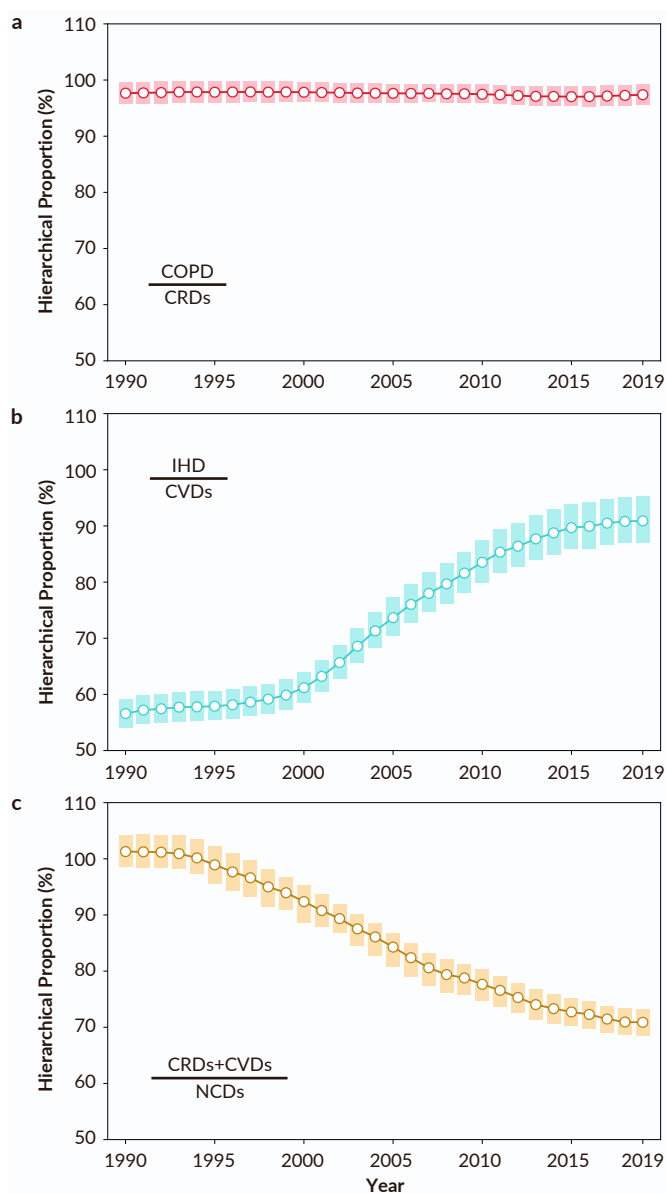

**Figure S10 | 30-year trend of hierarchical multi-cause mortality fractions.**

Three hierarchical fraction values are calculated, as a) chronic obstructive pulmonary disease (COPD) excess deaths out of all chronic respiratory deaths, COPD/CRDs; b) ischaemic heart disease (IHD) excess deaths out of all cardiovascular deaths, IHD/CVDs; and c) total chronic respiratory and cardiovascular excess deaths out of deaths due to all non-communicable diseases, (CRDs+CVDs)/NCDs. The median values for each year are indicated by dots, with 95% uncertainty intervals presented by shades.



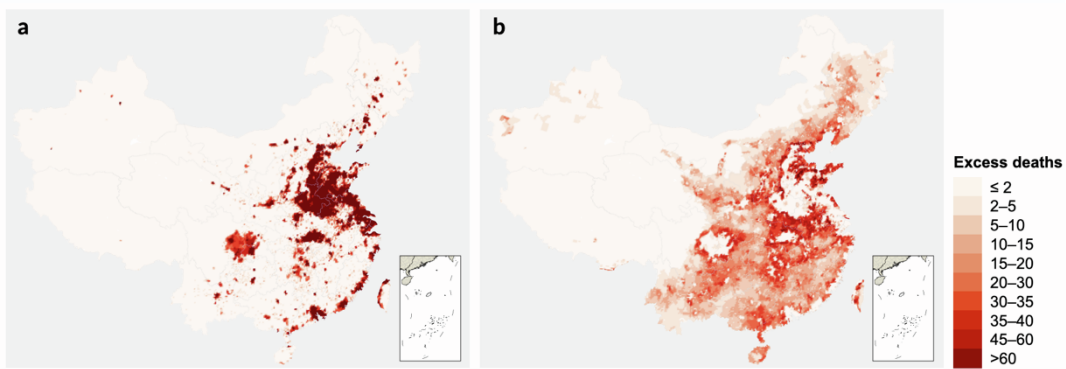

**Figure S11 | Gridded mapping of urban and rural cardiopulmonary premature deaths in 2019.**

The spatial resolution for grid-specific population ambient O<sub>3</sub> exposure assignment and associated mortality estimation with (a) urban and (b) rural differentiation is 1/8°×1/8° (approximately 10×10 km<sup>2</sup>). Long-term ambient O<sub>3</sub> exposure-associated excess cardiopulmonary premature deaths are defined as the total mortality cases caused from chronic obstructive pulmonary diseases (COPD) and all-type cardiovascular diseases. Intervals of colourbar are defined by Jenks natural breaks.

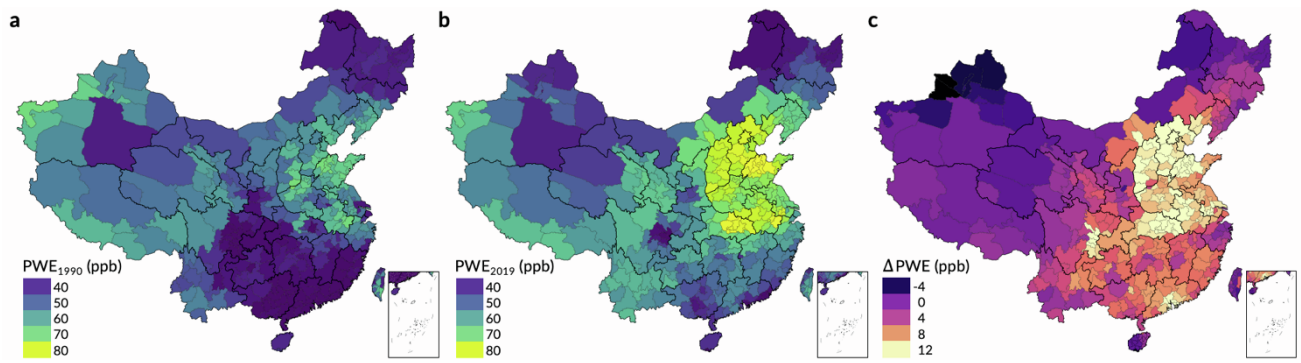

**Figure S12 | Changes in population-weighted ozone exposure comparing 1990 with 2019.**

Panel a and b map population-weighted exposure (PWE) concentrations to ambient ozone (ppb) by OSDMA8 metric in year 1990 and 2019, respectively. Panel c presents the change of PWE ( $\Delta$ PWE) from 1990 to 2019. Only 2 years of PWE are considered for comparison.

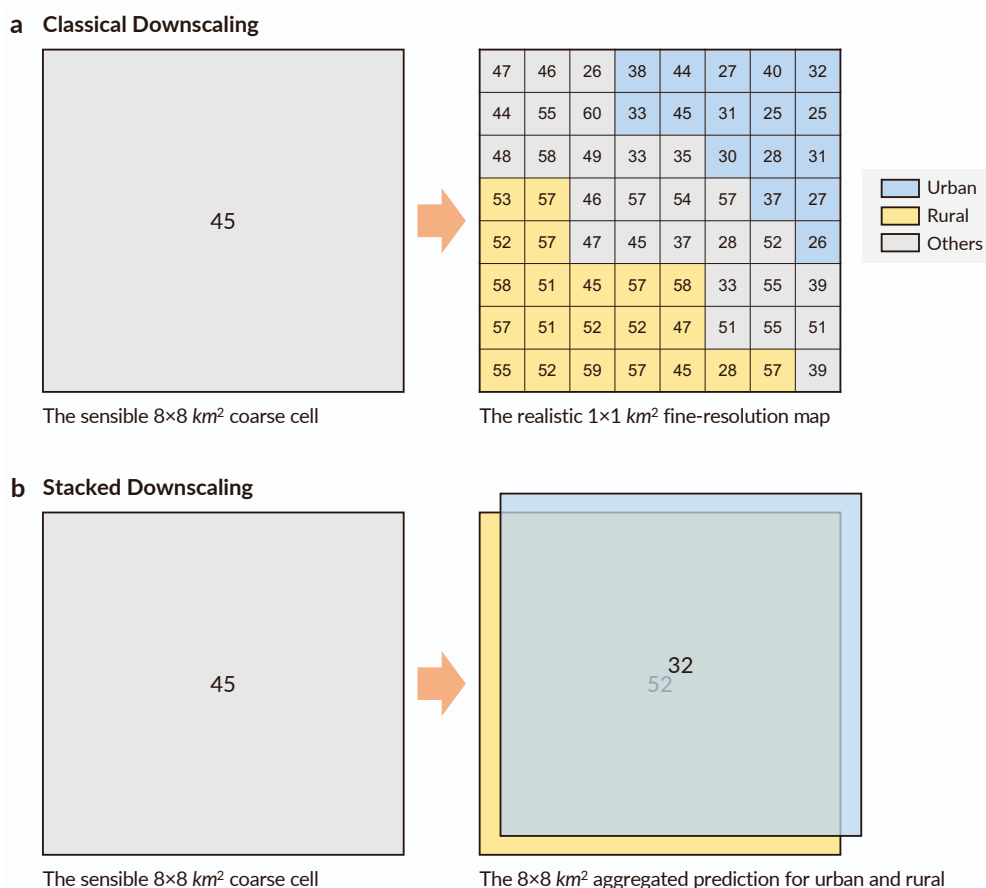

**Figure S13 | Schematic diagram of (a) classical high-resolution downscaling and (b) urban-rural differentiated stacked downscaling.**

a. Classical downscaling requires predictions precise to target finer resolution (from 45 ppb to 47, 46, 26, ... ppb for each finer cell, a total of  $8 \times 8 = 64$  times of predictions), which however is frequently unfeasible in practice due to lack of high-resolution auxiliary datasets as predictors. Note in the diagram, spatial resolution and gridded values are manually faked, simply for illustration purpose. b. The left panel presents an  $8 \times 8 \text{ km}^2$  coarse cell of which the cell-level ambient  $\text{O}_3$  concentrations (like 45 ppb) are sensible as an integrity (e.g. by remote-sensing measurement, model fusion calibrated by deep learning algorithms, etc.) to represent the average level of the whole cell. However,  $8 \times 8 \text{ km}^2$  is still a large domain with substantial intra-cell variability in term of ambient  $\text{O}_3$ , as shown in the right part of panel a. Under the circumstance when it is unfeasible to realise higher-resolution downscaling (e.g.  $1 \times 1 \text{ km}^2$ ) but there are multi-site urban- and rural-classified observations inside the studied cell, the urban and rural average ambient  $\text{O}_3$  concentrations, 32 and 52 ppb, can be calculated and stacked to the cell, as shown in the right panel. The stacked downscaling only requires two times of predictions, from 45 to 32 ppb for urban concentration, and from 45 to 52 ppb for rural concentration. Note in the diagram, spatial resolution and gridded values are manually faked, aiming at illustrative presentations.

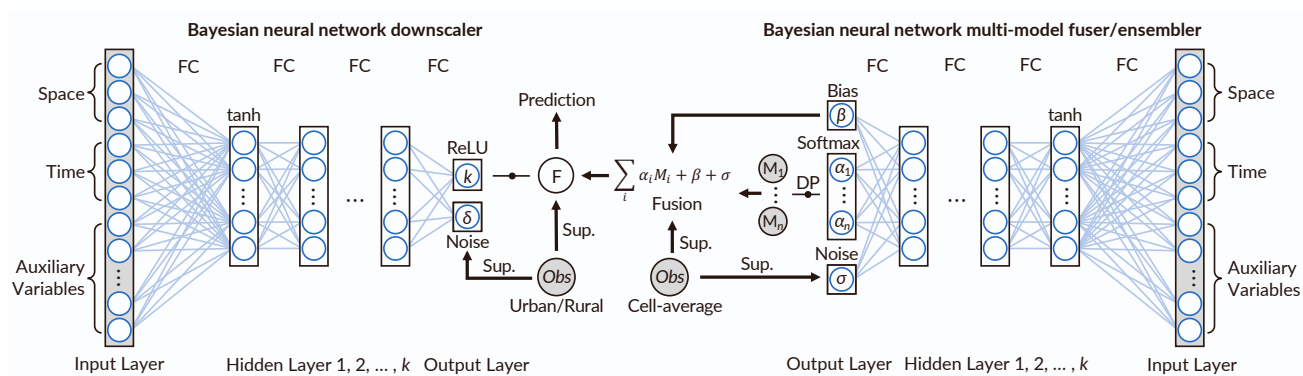

**Figure S14 | Schematic diagram of Bayesian neural network multi-model fuser and downscaler.**

Right part demonstrates deep-learning-based multi-model fuser, and left part depicts urban-rural downscaler. The shaded elements refer to the external datasets not affected by neural network; the rectangle circumscribed elements indicate the input, processing and output variates inside the neural network; and non-rectangle circumscribed elements represent the final products. The schematic diagram is appropriately modified from a publication<sup>2</sup> with full consents from American Chemical Society Publications and involved authors.

**Abbreviations and denotations:** FC, fully connected; Sup., supervised training; DP, dot product; F, multi-model fused output; Obs, observations; ReLU, rectified linear unit; M, calibrated CMIP6 models; Softmax, normalised exponential function; tanh, hyperbolic tangent function.

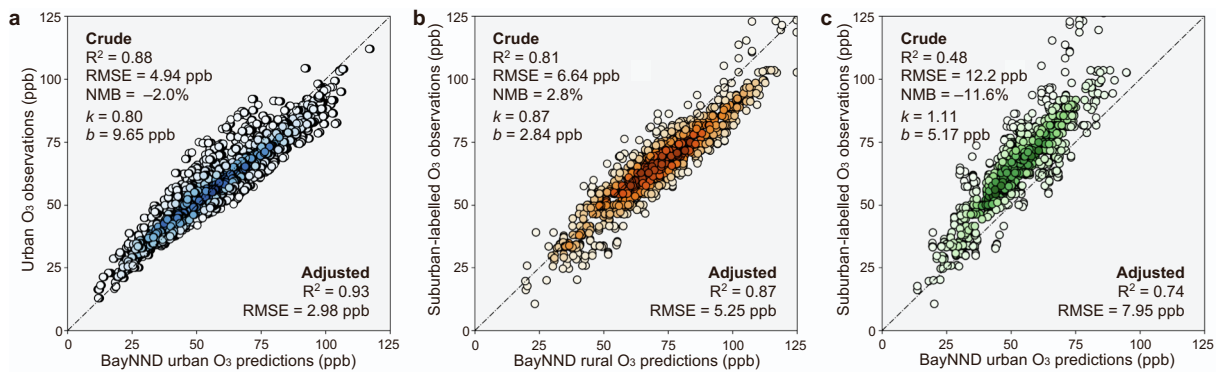

**Figure S15 | Extrapolation validations on Chinese *in situ* observations with (a) urban, (b) rural, and (c) suburban differentiation by metric of monthly average of daily 8-hour maximum.**

Prediction-observation extrapolation evaluations span from May 2014 to December 2019, including statistics of coefficient of determination ( $R^2$ ), root-mean-square error (RMSE, ppb), normalised mean bias (NMB, %, defined as difference that prediction minus observation proportion to observation), linear regression slope ( $k$ ) and intercept ( $b$ ). No Chinese *in situ* observations are included for Bayesian neural network framework training; predictions for urban and rural ambient O<sub>3</sub> in China are results of spatial extrapolation. Crude evaluations are performed on the observations and raw predictions by BayNND, and adjusted evaluations on the observations and 1:1-linearly calibrated predictions by BayNND. Adjusted evaluations are all of fixed NMB = 0%, slope ( $k=1$ ), and intercept ( $b=0$ ). Panel (b) evaluates the coherence between “suburban”-labelled observations and rural O<sub>3</sub> predictions, and (c) evaluates the consistency between “suburban”-labelled observations and urban O<sub>3</sub> predictions. Data-based evidence reveals the “suburban”-labelled ambient O<sub>3</sub> concentrations are closer to rural than urban pattern.

### Stacked Upscaling

|     |     |     |     |     |     |     |     |
|-----|-----|-----|-----|-----|-----|-----|-----|
|     |     |     | 2.1 | 3.5 | 5.4 | 7.9 | 8.8 |
|     |     |     | 2.5 | 5.5 | 5.7 | 8.9 | 9.6 |
|     |     |     |     |     | 3.8 | 6.6 | 6.5 |
| 0.2 | 0.1 |     |     |     |     | 4.4 | 6.2 |
| 0.3 | 0.2 |     |     |     |     |     | 1.7 |
| 0.3 | 0.4 | 0.4 | 0.4 | 0.3 |     |     |     |
| 0.3 | 0.5 | 0.5 | 0.3 | 0.3 |     |     |     |
| 0.3 | 0.3 | 0.4 | 0.4 | 0.4 | 0.2 | 0.1 |     |

The accessible  $1 \times 1 \text{ km}^2$  fine-resolution map

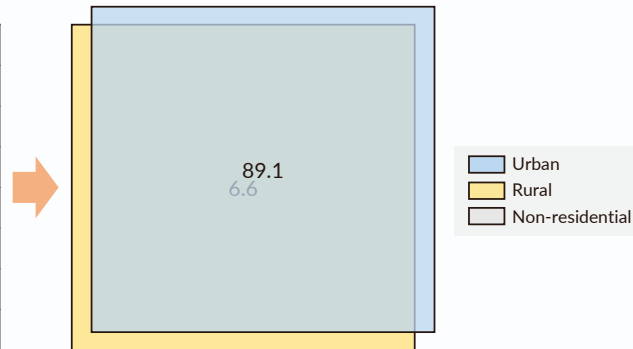

The  $8 \times 8 \text{ km}^2$  stacked urban and rural population

### Figure S16 | Schematic diagram of urban-rural stacked gridded population upscaling.

The left panel presents  $1 \times 1 \text{ km}^2$  higher-resolution population (in thousand) distribution in a target coarser  $8 \times 8 \text{ km}^2$  cell, in which urban and rural populations are defined based on population density. The upscaling process sums up the total finely gridded populations separately for urban and rural regions, and stacked the total urban population count 89,100 and rural population count 6,600 into the upscale coarse cell, as shown in the right panel. In further analyses, it will only be considered the upscaled cell-level total urban and rural populations (i.e. 89,100 and 6,600), rather than how the residents are spatially distributed (i.e. 2,100, 3,500, etc.). The populations scaled in coarse cell will be linked with ambient  $\text{O}_3$  in same spatial resolution. Note in the diagram, spatial resolution and gridded values are manually faked, aiming at illustrative presentations.

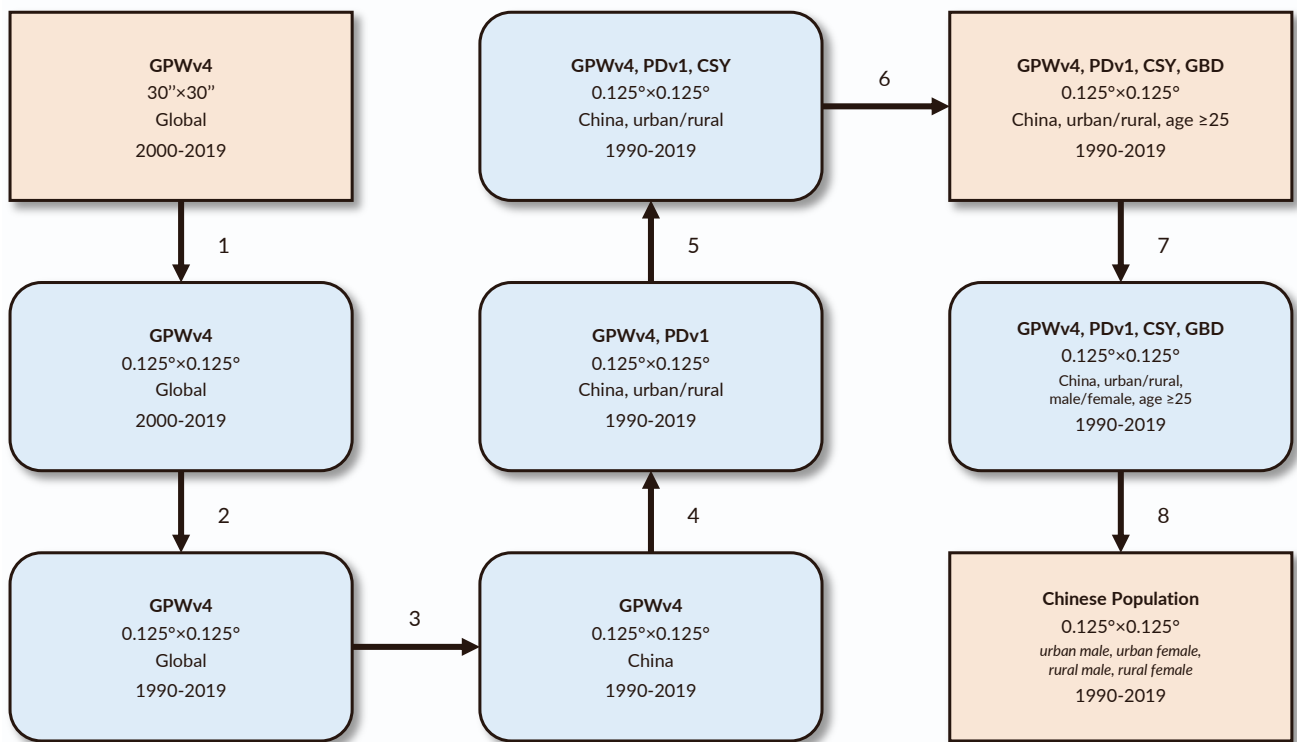

**Figure S17 | Flowchart of gridded population dataset construction and calibration.**

Rounded rectangles represent procedural data products; two rectangles refer to the initial input and final output datasets; number-marked arrows note manual operations for database development. Spatial resolution, space-time coverage, and population features are indicated in each dataset.

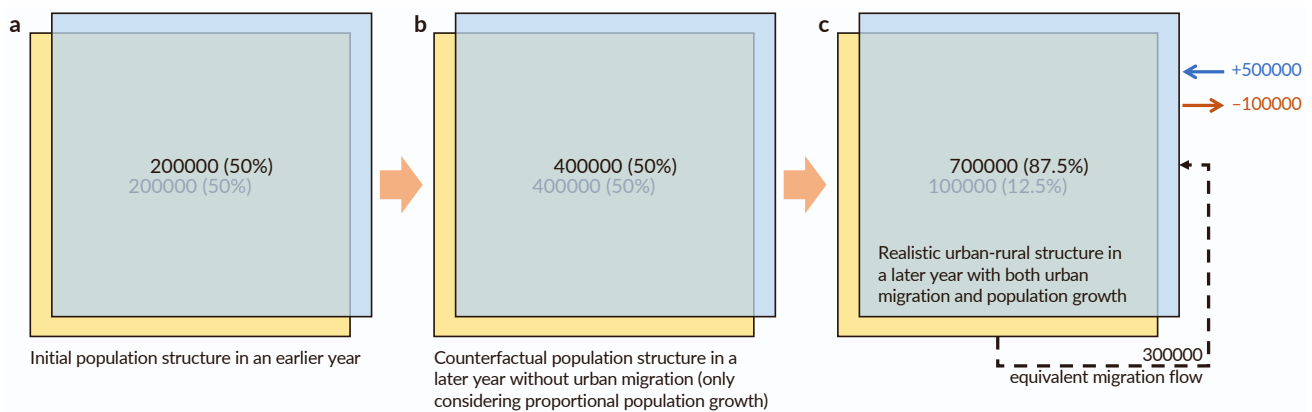

**Figure S18 | Schematic diagram of cross-sectional population migration at cell-level definition.**

Panel (a) represents the initial population structure in an earlier year, when urban and rural populations are both 200,000. Panel (b) indicates a counterfactual scenario in a later year, that only population growth occurs without any urban-rural population structure change. The cell-level total population doubles from 400,000 to 800,000, among which urban and rural populations increase proportionally to 400,000. Panel (c) reflects the realistic population structure in the later year, when urban population is 700,000 and rural population is 100,000. Directly comparing the realistic situation (a and c), urban population expands by 500,000 and rural population shrinks by 100,000, which is affected both by population growth and migration. Adjusting the effect from population growth assuming urban and rural populations are of the same growing rate, the population migration flow can be equivalently perceived as 300,000 rural population inside the studied cell migrate to the urban environments in the same cell (comparing b and c), so that rural population can be perceived as  $400,000 - 300,000 = 100,000$ , and urban population as  $400,000 + 300,000 = 700,000$ .



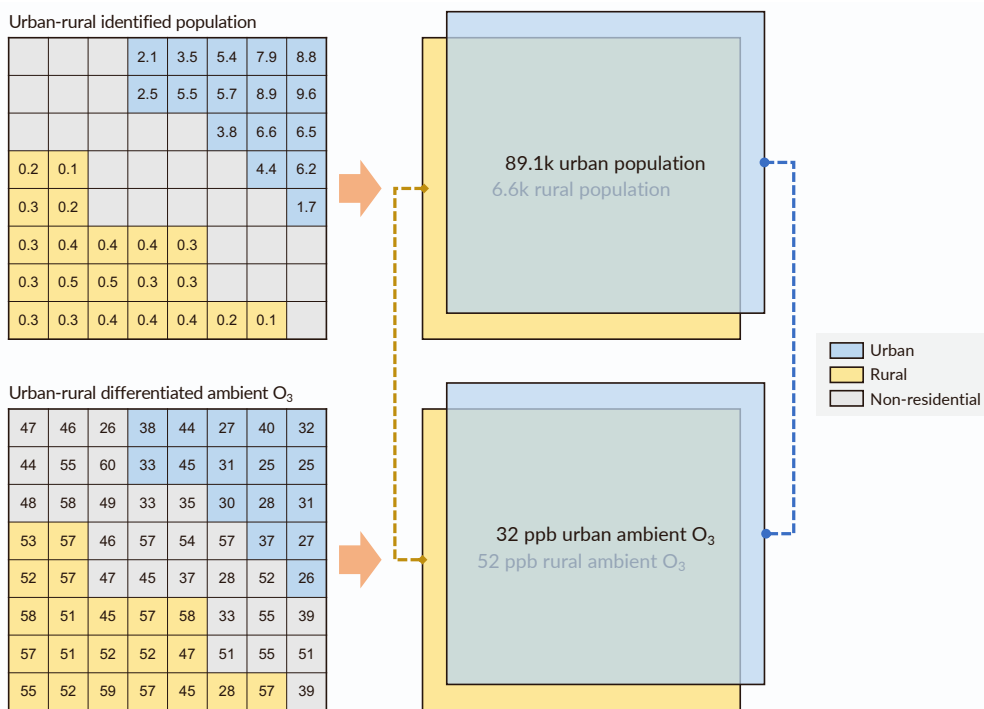

**Figure S19 | Schematic diagram of cell-level population exposure assignment in stacked context.**

The upper part presents upscaling of stacked urban-rural population, and the lower part shows the urban-rural differentiation of ambient O<sub>3</sub> concentrations. The right part demonstrates how urban (or rural) populations are linked to urban (or rural) ambient O<sub>3</sub> exposure in the stacked context, as 89,100 urban population are exposed to 32 ppb O<sub>3</sub> on average, and 6,600 rural population are exposed to 52 ppb O<sub>3</sub>.

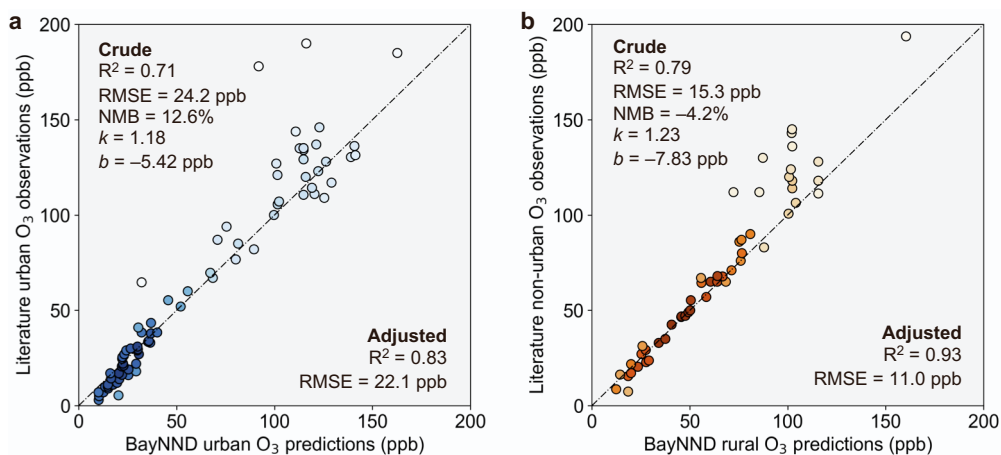

**Figure S20 | External ozone prediction validations with literature reported observations.**

Enhanced external evaluations beyond CNEMC span from October 1993 to December 2019, including statistics of coefficient of determination ( $R^2$ ), root-mean-square error (RMSE), normalised mean bias (NMB), linear regression slope ( $k$ ) and intercept ( $b$ ). Only point-to-point evaluations are performed, excluding literatures only reporting concentration ranges. All available metrics in monthly smoothed values are included with necessary cross-metric conversion. When multiple metrics are provided in literature, the daily 24-h average and diurnal maximum 8-h average are preferred. Crude evaluations are performed on the observations and raw predictions by BayNND, and adjusted evaluations on the observations and 1:1-linearly calibrated predictions by BayNND. Adjusted evaluations are all of fixed NMB = 0%, slope ( $k = 1$ ), and intercept ( $b = 0$ ). Full information can be found at [Content S2](#).

## SUPPLEMENTARY CONTENTS

### Content S1 | Population density of “suburban”-labelled CNEMC observation stations in 2019.

A total of 245 “suburban”-labelled CNEMC stations are projected to gridded population (see “Population gridding and calibration” section in *Methods*). Planar cell (approximated as rectangles) areas are calculated by planar meridional distance multiplied by planar parallel distance, where meridional ( $m$ ) and parallel ( $p$ ) distance follow the two formulae below, where  $R$  is the average Earth radius, 6378.137 km. Population densities are calculated by cell-specific total population divided by cell area. Urban locations (U) are categorised by population density >1,500 people per  $km^2$  (C1), and more conservatively, an additional urban categorisation by population density threshold >1,000 people per  $km^2$  (C2) is provided as a sensitivity analysis. By C1, 242 out of 245 sites are classified as rural (R); by C2, 232 out sites are classified as rural, indicating “suburban”-labelled sites are more of rural sociodemographic characteristics.

| Station | Longitude (°E) | Latitude (°N) | Pop. Des. | C1 | C2 | Station | Longitude (°E) | Latitude (°N) | Pop. Des. | C1 | C2 |
|---------|----------------|---------------|-----------|----|----|---------|----------------|---------------|-----------|----|----|
| 1002A   | 116.220        | 40.292        | 503       | R  | R  | 1855A   | 111.675        | 29.024        | 205       | R  | R  |
| 1013A   | 117.151        | 39.097        | 1543      | U  | U  | 1856A   | 111.679        | 29.038        | 205       | R  | R  |
| 1014A   | 117.193        | 39.173        | 2175      | U  | U  | 1857A   | 111.716        | 29.146        | 259       | R  | R  |
| 1016A   | 117.184        | 39.121        | 1543      | U  | U  | 1861A   | 110.442        | 29.315        | 141       | R  | R  |
| 1020A   | 117.269        | 39.134        | 1483      | R  | U  | 1862A   | 110.414        | 25.317        | 258       | R  | R  |
| 1025A   | 117.401        | 39.124        | 568       | R  | R  | 1866A   | 109.226        | 21.588        | 232       | R  | R  |
| 1027A   | 117.157        | 38.919        | 296       | R  | R  | 1882A   | 104.563        | 28.793        | 265       | R  | R  |
| 1028A   | 114.564        | 38.055        | 1312      | R  | U  | 1887A   | 104.679        | 28.799        | 277       | R  | R  |
| 1035A   | 114.352        | 37.891        | 286       | R  | R  | 1893A   | 105.432        | 28.963        | 262       | R  | R  |
| 1036A   | 118.166        | 39.631        | 539       | R  | R  | 1897A   | 104.755        | 29.363        | 590       | R  | R  |
| 1039A   | 118.219        | 39.668        | 540       | R  | R  | 1905A   | 106.056        | 30.806        | 563       | R  | R  |
| 1058A   | 114.892        | 40.795        | 328       | R  | R  | 1918A   | 108.720        | 34.396        | 776       | R  | R  |
| 1061A   | 114.892        | 40.866        | 328       | R  | R  | 1921A   | 108.737        | 34.316        | 559       | R  | R  |
| 1066A   | 117.927        | 41.003        | 183       | R  | R  | 1922A   | 109.066        | 35.099        | 196       | R  | R  |
| 1069A   | 116.715        | 39.557        | 358       | R  | R  | 1926A   | 109.413        | 36.628        | 85        | R  | R  |
| 1076A   | 115.691        | 37.739        | 263       | R  | R  | 1930A   | 107.185        | 34.306        | 239       | R  | R  |
| 1082A   | 112.573        | 37.910        | 1053      | R  | U  | 1938A   | 109.529        | 34.510        | 360       | R  | R  |
| 1083A   | 112.434        | 38.011        | 488       | R  | R  | 1942A   | 102.188        | 38.525        | 77        | R  | R  |
| 1092A   | 111.659        | 40.845        | 247       | R  | R  | 1947A   | 106.339        | 38.817        | 114       | R  | R  |
| 1093A   | 111.608        | 40.814        | 173       | R  | R  | 2073A   | 117.721        | 24.509        | 501       | R  | R  |
| 1098A   | 123.684        | 41.934        | 991       | R  | R  | 2074A   | 117.657        | 24.516        | 501       | R  | R  |
| 1101A   | 123.284        | 41.769        | 1232      | R  | U  | 2075A   | 117.634        | 24.467        | 260       | R  | R  |
| 1107A   | 123.361        | 41.781        | 1232      | R  | U  | 2165A   | 112.845        | 35.546        | 300       | R  | R  |
| 1125A   | 125.719        | 43.515        | 408       | R  | R  | 2177A   | 111.040        | 35.039        | 183       | R  | R  |
| 1129A   | 126.542        | 45.755        | 1430      | R  | U  | 2180A   | 112.736        | 38.419        | 144       | R  | R  |
| 1146A   | 120.978        | 31.094        | 585       | R  | R  | 2189A   | 122.260        | 43.627        | 100       | R  | R  |
| 1160A   | 120.561        | 31.247        | 398       | R  | R  | 2190A   | 122.304        | 43.616        | 70        | R  | R  |
| 1174A   | 119.141        | 34.590        | 599       | R  | R  | 2193A   | 119.728        | 49.201        | 24        | R  | R  |
| 1175A   | 119.368        | 34.751        | 26        | R  | R  | 2194A   | 107.594        | 40.916        | 89        | R  | R  |
| 1176A   | 119.348        | 34.698        | 300       | R  | R  | 2199A   | 122.062        | 46.087        | 106       | R  | R  |
| 1179A   | 117.192        | 34.308        | 933       | R  | R  | 2204A   | 105.647        | 38.836        | 4         | R  | R  |
| 1183A   | 117.166        | 34.181        | 801       | R  | R  | 2224A   | 124.342        | 43.175        | 277       | R  | R  |
| 1184A   | 119.460        | 32.388        | 751       | R  | R  | 2228A   | 125.157        | 42.895        | 248       | R  | R  |
| 1185A   | 119.404        | 32.410        | 751       | R  | R  | 2241A   | 130.982        | 45.305        | 195       | R  | R  |
| 1187A   | 119.439        | 32.403        | 751       | R  | R  | 2242A   | 131.010        | 45.295        | 132       | R  | R  |
| 1197A   | 119.933        | 31.779        | 885       | R  | R  | 2247A   | 130.110        | 47.338        | 74        | R  | R  |
| 1198A   | 119.962        | 31.809        | 885       | R  | R  | 2251A   | 131.120        | 46.566        | 132       | R  | R  |
| 1199A   | 120.039        | 31.764        | 1076      | R  | U  | 2254A   | 129.503        | 48.471        | 45        | R  | R  |
| 1208A   | 119.882        | 32.303        | 593       | R  | R  | 2259A   | 130.379        | 46.759        | 159       | R  | R  |
| 1217A   | 120.129        | 33.372        | 324       | R  | R  | 2260A   | 131.003        | 45.768        | 152       | R  | R  |
| 1219A   | 118.266        | 33.960        | 325       | R  | R  | 2261A   | 130.863        | 45.819        | 78        | R  | R  |
| 1222A   | 118.321        | 33.951        | 325       | R  | R  | 2262A   | 131.052        | 45.875        | 148       | R  | R  |
| 1225A   | 119.026        | 29.635        | 75        | R  | R  | 2265A   | 127.529        | 50.247        | 79        | R  | R  |
| 1237A   | 121.554        | 29.891        | 349       | R  | R  | 2268A   | 124.119        | 50.427        | 6         | R  | R  |
| 1238A   | 121.615        | 29.902        | 349       | R  | R  | 2272A   | 117.309        | 32.935        | 436       | R  | R  |
| 1248A   | 120.576        | 30.007        | 442       | R  | R  | 2276A   | 117.042        | 32.661        | 336       | R  | R  |
| 1249A   | 120.100        | 30.887        | 233       | R  | R  | 2281A   | 116.633        | 32.620        | 253       | R  | R  |
| 1251A   | 120.093        | 30.862        | 352       | R  | R  | 2293A   | 117.049        | 30.549        | 220       | R  | R  |
| 1273A   | 117.160        | 31.905        | 722       | R  | R  | 2300A   | 118.316        | 32.306        | 199       | R  | R  |
| 1280A   | 119.390        | 26.054        | 689       | R  | R  | 2304A   | 116.977        | 33.648        | 449       | R  | R  |
| 1286A   | 118.161        | 24.817        | 672       | R  | R  | 2305A   | 116.968        | 33.628        | 449       | R  | R  |
| 1293A   | 115.973        | 28.697        | 660       | R  | R  | 2313A   | 117.481        | 30.641        | 173       | R  | R  |
| 1296A   | 115.742        | 28.800        | 425       | R  | R  | 2315A   | 117.497        | 30.654        | 173       | R  | R  |
| 1297A   | 115.912        | 28.613        | 413       | R  | R  | 2323A   | 118.981        | 25.479        | 441       | R  | R  |
| 1302A   | 116.989        | 36.687        | 757       | R  | R  | 2327A   | 117.728        | 26.311        | 143       | R  | R  |
| 1307A   | 120.666        | 36.240        | 44        | R  | R  | 2331A   | 118.097        | 26.676        | 120       | R  | R  |
| 1324A   | 113.515        | 34.911        | 1071      | R  | U  | 2335A   | 117.019        | 25.118        | 103       | R  | R  |
| 1334A   | 113.845        | 30.292        | 253       | R  | R  | 2339A   | 119.500        | 26.695        | 131       | R  | R  |
| 1344A   | 112.958        | 28.361        | 878       | R  | R  | 2340A   | 119.520        | 26.661        | 131       | R  | R  |
| 1355A   | 113.443        | 23.304        | 1192      | R  | U  | 2342A   | 117.310        | 29.387        | 120       | R  | R  |

| Station | Longitude (°E) | Latitude (°N) | Pop. Des. | C1 | C2 | Station | Longitude (°E) | Latitude (°N) | Pop. Des. | C1 | C2 |
|---------|----------------|---------------|-----------|----|----|---------|----------------|---------------|-----------|----|----|
| 1382A   | 113.441        | 22.485        | 792       | R  | R  | 2347A   | 114.100        | 27.500        | 152       | R  | R  |
| 1400A   | 112.475        | 23.100        | 178       | R  | R  | 2352A   | 115.086        | 27.932        | 237       | R  | R  |
| 1405A   | 108.439        | 22.790        | 177       | R  | R  | 2356A   | 114.912        | 27.804        | 209       | R  | R  |
| 1409A   | 110.576        | 19.951        | 133       | R  | R  | 2357A   | 116.982        | 28.114        | 174       | R  | R  |
| 1414A   | 106.379        | 29.828        | 703       | R  | R  | 2362A   | 114.902        | 25.915        | 234       | R  | R  |
| 1415A   | 106.460        | 29.574        | 923       | R  | R  | 2371A   | 114.341        | 27.806        | 271       | R  | R  |
| 1423A   | 106.571        | 29.564        | 993       | R  | R  | 2376A   | 116.213        | 28.081        | 198       | R  | R  |
| 1424A   | 106.512        | 29.516        | 993       | R  | R  | 2381A   | 118.005        | 28.457        | 267       | R  | R  |
| 1430A   | 106.591        | 29.427        | 591       | R  | R  | 2384A   | 117.903        | 28.430        | 239       | R  | R  |
| 1438A   | 103.620        | 31.020        | 159       | R  | R  | 2393A   | 114.991        | 35.767        | 596       | R  | R  |
| 1449A   | 102.743        | 25.012        | 462       | R  | R  | 2411A   | 115.658        | 34.402        | 629       | R  | R  |
| 1451A   | 102.625        | 24.961        | 264       | R  | R  | 2428A   | 111.042        | 32.395        | 89        | R  | R  |
| 1472A   | 108.869        | 34.378        | 1121      | R  | U  | 2442A   | 112.193        | 31.038        | 164       | R  | R  |
| 1477A   | 104.137        | 35.945        | 124       | R  | R  | 2445A   | 114.886        | 30.452        | 552       | R  | R  |
| 1481A   | 101.749        | 36.692        | 316       | R  | R  | 2447A   | 114.318        | 29.814        | 240       | R  | R  |
| 1483A   | 101.524        | 36.687        | 214       | R  | R  | 2456A   | 112.500        | 26.917        | 446       | R  | R  |
| 1484A   | 105.951        | 38.602        | 150       | R  | R  | 2462A   | 111.524        | 27.303        | 402       | R  | R  |
| 1485A   | 106.268        | 38.474        | 150       | R  | R  | 2467A   | 112.407        | 28.643        | 310       | R  | R  |
| 1486A   | 106.217        | 38.454        | 162       | R  | R  | 2472A   | 113.007        | 25.906        | 213       | R  | R  |
| 1487A   | 106.072        | 38.486        | 161       | R  | R  | 2477A   | 111.622        | 26.208        | 193       | R  | R  |
| 1492A   | 87.475         | 43.947        | 750       | R  | R  | 2482A   | 109.598        | 27.572        | 163       | R  | R  |
| 1552A   | 106.805        | 26.300        | 157       | R  | R  | 2487A   | 111.959        | 27.890        | 292       | R  | R  |
| 1559A   | 113.251        | 27.834        | 303       | R  | R  | 2492A   | 109.641        | 28.256        | 215       | R  | R  |
| 1564A   | 112.488        | 27.916        | 349       | R  | R  | 2505A   | 109.568        | 23.148        | 234       | R  | R  |
| 1586A   | 109.810        | 40.658        | 331       | R  | R  | 2509A   | 110.111        | 22.702        | 275       | R  | R  |
| 1614A   | 118.612        | 24.960        | 915       | R  | R  | 2516A   | 108.201        | 24.715        | 88        | R  | R  |
| 1615A   | 117.685        | 36.205        | 493       | R  | R  | 2523A   | 105.895        | 32.454        | 88        | R  | R  |
| 1617A   | 117.715        | 36.208        | 493       | R  | R  | 2527A   | 105.545        | 30.568        | 552       | R  | R  |
| 1626A   | 115.997        | 36.457        | 570       | R  | R  | 2535A   | 103.772        | 29.546        | 330       | R  | R  |
| 1627A   | 115.984        | 36.480        | 570       | R  | R  | 2539A   | 104.031        | 30.048        | 327       | R  | R  |
| 1647A   | 121.595        | 37.387        | 245       | R  | R  | 2543A   | 106.631        | 30.528        | 579       | R  | R  |
| 1649A   | 119.092        | 36.731        | 556       | R  | R  | 2546A   | 106.641        | 30.484        | 409       | R  | R  |
| 1651A   | 119.161        | 36.657        | 565       | R  | R  | 2548A   | 107.528        | 31.283        | 250       | R  | R  |
| 1654A   | 116.586        | 35.414        | 566       | R  | R  | 2553A   | 103.009        | 30.013        | 211       | R  | R  |
| 1667A   | 118.586        | 37.444        | 196       | R  | R  | 2557A   | 106.758        | 31.848        | 389       | R  | R  |
| 1668A   | 118.819        | 37.378        | 174       | R  | R  | 2561A   | 104.662        | 30.137        | 513       | R  | R  |
| 1696A   | 114.678        | 23.757        | 111       | R  | R  | 2566A   | 102.188        | 31.914        | 6         | R  | R  |
| 1699A   | 111.980        | 21.859        | 161       | R  | R  | 2571A   | 102.343        | 27.810        | 131       | R  | R  |
| 1702A   | 113.043        | 23.691        | 444       | R  | R  | 2576A   | 104.800        | 26.589        | 161       | R  | R  |
| 1705A   | 116.637        | 23.672        | 830       | R  | R  | 2598A   | 100.214        | 26.858        | 49        | R  | R  |
| 1712A   | 112.039        | 22.917        | 142       | R  | R  | 2617A   | 98.578         | 24.441        | 93        | R  | R  |
| 1721A   | 113.382        | 40.110        | 160       | R  | R  | 2623A   | 97.181         | 31.125        | 6         | R  | R  |
| 1722A   | 113.286        | 40.096        | 261       | R  | R  | 2627A   | 88.893         | 29.237        | 19        | R  | R  |
| 1729A   | 113.147        | 36.196        | 314       | R  | R  | 2631A   | 80.090         | 32.504        | 1         | R  | R  |
| 1732A   | 111.513        | 36.098        | 238       | R  | R  | 2634A   | 106.989        | 33.184        | 169       | R  | R  |
| 1737A   | 111.492        | 36.042        | 337       | R  | R  | 2638A   | 109.741        | 38.334        | 55        | R  | R  |
| 1754A   | 123.129        | 41.023        | 461       | R  | R  | 2642A   | 109.032        | 32.654        | 127       | R  | R  |
| 1778A   | 126.706        | 43.713        | 137       | R  | R  | 2649A   | 106.006        | 34.343        | 126       | R  | R  |
| 1782A   | 123.626        | 47.203        | 132       | R  | R  | 2653A   | 102.647        | 37.936        | 105       | R  | R  |
| 1797A   | 118.402        | 31.384        | 525       | R  | R  | 2660A   | 107.683        | 35.729        | 226       | R  | R  |
| 1802A   | 118.625        | 31.724        | 527       | R  | R  | 2665A   | 105.082        | 33.326        | 59        | R  | R  |
| 1810A   | 115.977        | 29.570        | 276       | R  | R  | 2680A   | 105.003        | 37.464        | 51        | R  | R  |
| 1818A   | 114.484        | 36.062        | 744       | R  | R  | 2683A   | 106.232        | 36.142        | 110       | R  | R  |
| 1821A   | 114.393        | 36.088        | 745       | R  | R  | 2690A   | 88.124         | 43.889        | 18        | R  | R  |
| 1822A   | 114.286        | 36.110        | 839       | R  | R  | 2701A   | 79.949         | 37.115        | 52        | R  | R  |
| 1823A   | 114.341        | 34.802        | 523       | R  | R  | 2702A   | 79.912         | 37.101        | 52        | R  | R  |
| 1825A   | 114.373        | 34.798        | 523       | R  | R  | 2707A   | 88.121         | 47.905        | 15        | R  | R  |
| 1830A   | 113.199        | 35.270        | 683       | R  | R  | 2874A   | 117.041        | 32.646        | 336       | R  | R  |
| 1831A   | 113.306        | 33.721        | 663       | R  | R  | 2914A   | 106.768        | 31.879        | 340       | R  | R  |
| 1838A   | 111.143        | 34.796        | 188       | R  | R  | 2916A   | 117.490        | 30.660        | 173       | R  | R  |
| 1846A   | 112.289        | 30.306        | 225       | R  | R  | 2923A   | 113.280        | 40.111        | 261       | R  | R  |
| 1852A   | 113.212        | 29.355        | 186       | R  | R  | 3122A   | 105.961        | 26.261        | 319       | R  | R  |
| 1853A   | 111.704        | 29.024        | 205       | R  | R  |         |                |               |           |    |    |

Note:  $m = 2 \sin^{-1} \sqrt{\cos\left(\left(\text{lat} - \frac{1}{16}\right) \cdot \frac{\pi}{180}\right) \cdot \cos\left(\left(\text{lat} + \frac{1}{16}\right) \cdot \frac{\pi}{180}\right) \cdot \sin^2\left(\frac{1}{16} \cdot \frac{\pi}{180}\right)} \times R$ ,  $p = 2 \sin^{-1} \sqrt{\sin^2\left(\frac{1}{16} \cdot \frac{\pi}{180}\right)} \times R$ .

## Content S2 | Literature-based external validations of urban-rural ambient ozone predictions.

Accuracy evaluations on CNEMC observations are limited to the latest six years (2014–2019). To check the reliability of 30-yr deep-learning-based prediction, totally 68 peer-reviewed studies reporting *in situ* observations of ambient O<sub>3</sub> are collected for enhanced model-observation comparison. The developed ambient O<sub>3</sub> database covers two metrics as i) monthly average of daily 24-h average, and ii) monthly average of daily maximum 8-h average. The metric, daily diurnal 7-h average, adopted in earlier literatures, are compared to daily maximum 8-h average as an alternative proxy. For prediction-observation comparisons on daily 1-h maximum metric, null-intercept linear conversion is applied to approximately project daily 8-h maximum average (DMA8h) concentrations onto daily 1-h maximum average (DMA1h) concentrations. The idea of null-intercept linear conversion was put forward by US EPA (Volume I, section 7.1.3.2)<sup>78</sup>, and the conversion coefficients have been updated by 30-yr historical observations archived in TOAR and CNEMC<sup>14</sup>. At multi-season or multi-year scale, the conversion follows: DMA1h = DMA8h × 1.213; in warm seasons (i.e. April to September), the conversion follows: DMA1h = DMA8h × 1.202, where O<sub>3</sub> concentrations in DMA8h metric are obtained from Bayesian neural network downscaler. Observed and deep-learning-modelled ambient O<sub>3</sub> concentrations are both unified into ppb. IGAC (International Global Atmospheric Chemistry project) TOAR-II Working Group has double-checked the external validation in August 2022, and recognised the credibility of the database for long-term population exposure tracking and risk assessment studies (<https://igacproject.org/human-health-impacts-ozone-focus-working-group>, accessed February 2023).

| Site location              | Longitude (°E) | Latitude (°N) | Period start | Period end | Metric              | Type  | Observed  | Modelled  | Refs          |
|----------------------------|----------------|---------------|--------------|------------|---------------------|-------|-----------|-----------|---------------|
| Chongqing                  | 106.5          | 29.6          | Oct-93       |            | Period 24-h average | Urban | 7         | 12.6      | <sup>79</sup> |
| Chongqing                  | 106.5          | 29.6          | Oct-93       |            | Daily 7-h average   | Urban | 12        | 19.6      | <sup>79</sup> |
| Chongqing                  | 106.5          | 29.6          | Nov-93       |            | Period 24-h average | Urban | 10        | 13.5      | <sup>79</sup> |
| Chongqing                  | 106.5          | 29.6          | Nov-93       |            | Daily 7-h average   | Urban | 16        | 25.3      | <sup>79</sup> |
| Chongqing                  | 106.5          | 29.6          | Dec-93       |            | Period 24-h average | Urban | 3         | 10.2      | <sup>79</sup> |
| Chongqing                  | 106.5          | 29.6          | Dec-93       |            | Daily 7-h average   | Urban | 7         | 10.1      | <sup>79</sup> |
| Chongqing                  | 106.5          | 29.6          | Jan-94       |            | Period 24-h average | Urban | 5         | 10.4      | <sup>79</sup> |
| Chongqing                  | 106.5          | 29.6          | Jan-94       |            | Daily 7-h average   | Urban | 11        | 17.0      | <sup>79</sup> |
| Chongqing                  | 106.5          | 29.6          | Feb-94       |            | Period 24-h average | Urban | 9         | 15.0      | <sup>79</sup> |
| Chongqing                  | 106.5          | 29.6          | Feb-94       |            | Daily 7-h average   | Urban | 17        | 20.5      | <sup>79</sup> |
| Chongqing                  | 106.5          | 29.6          | Mar-94       |            | Period 24-h average | Urban | 11        | 17.6      | <sup>79</sup> |
| Chongqing                  | 106.5          | 29.6          | Mar-94       |            | Daily 7-h average   | Urban | 19        | 25.4      | <sup>79</sup> |
| Hong Kong SAR              | 114.0          | 22.0          | May-94       |            | Period 24-h average | Urban | 33        | 36.5      | <sup>80</sup> |
| Hong Kong SAR              | 114.0          | 22.0          | Jul-94       |            | Period 24-h average | Urban | 21        | 22.9      | <sup>80</sup> |
| Lin'an, Zhejiang           | 119.7          | 30.4          | Aug-94       | Jul-95     | Period maximum 1-h  | Rural | 120       | 100.7     | <sup>81</sup> |
| Waliguan, Qinghai          | 100.9          | 36.3          | Aug-94       | Jul-95     | Period maximum 1-h  | Rural | 130       | 87.3      | <sup>81</sup> |
| Shazikou, Shandong         | 120.5          | 36.1          | Aug-94       | Jul-95     | Period maximum 1-h  | Rural | 90        | 80.9      | <sup>81</sup> |
| Longfengshan, Heilongjiang | 127.6          | 44.7          | Aug-94       | Jul-95     | Period maximum 1-h  | Rural | 80        | 76.6      | <sup>81</sup> |
| Waliguan, Qinghai          | 100.9          | 36.3          | Aug-94       | Dec-13     | Period 24-h average | Rural | 65        | 60.6      | <sup>82</sup> |
| Hong Kong SAR              | 114.0          | 22.0          | Sep-94       |            | Period 24-h average | Urban | 52        | 52.1      | <sup>80</sup> |
| Hong Kong SAR              | 114.0          | 22.0          | Oct-94       |            | Period 24-h average | Urban | 60        | 55.7      | <sup>80</sup> |
| Hong Kong SAR              | 114.2          | 22.3          | Oct-94       | Nov-94     | Period 24-h average | Urban | 53±13     | 53.3      | <sup>83</sup> |
| Hong Kong SAR              | 114.0          | 22.3          | Oct-94       | Nov-94     | Period 24-h average | Urban | 69±23     | 52.4      | <sup>83</sup> |
| Longfengshan, Heilongjiang | 127.6          | 44.7          | Oct-94       | Jan-95     | Period maximum 1-h  | Rural | 86        | 75.3      | <sup>84</sup> |
| Lin'an, Zhejiang           | 119.7          | 30.4          | Oct-94       | Jan-95     | Period maximum 1-h  | Rural | 112       | 72.3      | <sup>84</sup> |
| Hong Kong SAR              | 114.3          | 22.2          | Oct-94       | Jan-95     | Period maximum 1-h  | Urban | 87        | 70.9      | <sup>84</sup> |
| Qingdao, Shandong          | 120.5          | 36.1          | Oct-94       | Jan-95     | Period maximum 1-h  | Urban | 67        | 68.5      | <sup>84</sup> |
| Mt Waliguan, Qinghai       | 100.9          | 36.3          | Jan-95       | Dec-18     | Annual average      | Rural | 47–56     | 53.7–57.9 | <sup>85</sup> |
| Beijing                    | 117.1          | 40.7          | Jan-95       | Dec-18     | Annual average      | Rural | 33–46     | 35.0–53.3 | <sup>85</sup> |
| Lin'an, Zhejiang           | 119.7          | 30.4          | Jan-95       | Dec-18     | Annual average      | Rural | 30–35     | 28.6–36.3 | <sup>85</sup> |
| Chongqing                  | 106.5          | 29.6          | Jun-95       |            | Period 24-h average | Urban | 11        | 14.9      | <sup>79</sup> |
| Chongqing                  | 106.5          | 29.6          | Jun-95       |            | Daily 7-h average   | Urban | 22        | 29.3      | <sup>79</sup> |
| Chongqing                  | 106.5          | 29.6          | Jul-95       |            | Period 24-h average | Urban | 10        | 14.9      | <sup>79</sup> |
| Chongqing                  | 106.5          | 29.6          | Jul-95       |            | Daily 7-h average   | Urban | 18        | 29.3      | <sup>79</sup> |
| Chongqing                  | 106.5          | 29.6          | Aug-95       |            | Period 24-h average | Urban | 17        | 16.1      | <sup>79</sup> |
| Chongqing                  | 106.5          | 29.6          | Aug-95       |            | Daily 7-h average   | Urban | 27        | 30.7      | <sup>79</sup> |
| Chongqing                  | 106.5          | 29.6          | Jun-96       |            | Period 24-h average | Urban | 29        | 24.3      | <sup>79</sup> |
| Chongqing                  | 106.5          | 29.6          | Jun-96       |            | Daily 7-h average   | Urban | 41        | 30.4      | <sup>79</sup> |
| Chongqing                  | 106.5          | 29.6          | Jul-96       |            | Period 24-h average | Urban | 27        | 23.3      | <sup>79</sup> |
| Chongqing                  | 106.5          | 29.6          | Jul-96       |            | Daily 7-h average   | Urban | 30        | 26.5      | <sup>79</sup> |
| Chongqing                  | 106.5          | 29.6          | Aug-96       |            | Period 24-h average | Urban | 31        | 30.0      | <sup>79</sup> |
| Chongqing                  | 106.5          | 29.6          | Aug-96       |            | Daily 7-h average   | Urban | 34        | 35.8      | <sup>79</sup> |
| Lin'an, Zhejiang           | 119.7          | 30.4          | Sep-99       |            | Period maximum 1-h  | Rural | 136       | 102.3     | <sup>86</sup> |
| Lin'an, Zhejiang           | 119.7          | 30.4          | Oct-99       |            | Period maximum 1-h  | Rural | 112       | 85.5      | <sup>86</sup> |
| Lin'an, Zhejiang           | 119.7          | 30.4          | Nov-99       |            | Period maximum 1-h  | Rural | 87        | 76.4      | <sup>86</sup> |
| Lin'an, Zhejiang           | 119.7          | 30.4          | Dec-99       |            | Period maximum 1-h  | Rural | 68        | 64.1      | <sup>86</sup> |
| Nanjing, Jiangsu           | 118.7          | 32.1          | Jan-00       | Feb-03     | Period 24-h average | Urban | 20.4±18.3 | 20.9      | <sup>87</sup> |
| Lin'an, Zhejiang           | 119.7          | 30.4          | Jan-00       |            | Period maximum 1-h  | Rural | 65        | 64.0      | <sup>86</sup> |
| Lin'an, Zhejiang           | 119.7          | 30.4          | Feb-00       |            | Period maximum 1-h  | Rural | 71        | 71.3      | <sup>86</sup> |
| Lin'an, Zhejiang           | 119.7          | 30.4          | Mar-00       |            | Period maximum 1-h  | Rural | 76        | 76.0      | <sup>86</sup> |
| Lin'an, Zhejiang           | 119.7          | 30.4          | Apr-00       |            | Period maximum 1-h  | Rural | 83        | 87.9      | <sup>86</sup> |
| Lin'an, Zhejiang           | 119.7          | 30.4          | May-00       |            | Monthly average     | Rural | 57        | 58.4      | <sup>88</sup> |
| Lin'an, Zhejiang           | 119.7          | 30.4          | May-00       |            | Period maximum 1-h  | Rural | 124       | 101.6     | <sup>86</sup> |
| Lin'an, Zhejiang           | 119.7          | 30.4          | Jun-00       |            | Period maximum 1-h  | Rural | 118       | 102.3     | <sup>86</sup> |
| Lin'an, Zhejiang           | 119.7          | 30.4          | Jul-00       |            | Period maximum 1-h  | Rural | 145       | 102.2     | <sup>86</sup> |
| Nanjing, Jiangsu           | 118.7          | 32.1          | 2000–2003    | Spring     | Monthly average     | Urban | 27±20.6   | 27.3      | <sup>87</sup> |
| Nanjing, Jiangsu           | 118.7          | 32.1          | 2000–2003    | Summer     | Monthly average     | Urban | 22.8±19.4 | 21.8      | <sup>87</sup> |
| Nanjing, Jiangsu           | 118.7          | 32.1          | 2000–2003    | Autumn     | Monthly average     | Urban | 18.4±16.7 | 19.8      | <sup>87</sup> |
| Nanjing, Jiangsu           | 118.7          | 32.1          | 2000–2003    | Winter     | Monthly average     | Urban | 14.1±12.9 | 17.6      | <sup>87</sup> |
| Shanghai                   | 121.5          | 31.2          | Jan-01       | Jan-04     | DMA8h               | Urban | 32.3±18.7 | 35.5      | <sup>89</sup> |

| Site location         | Longitude (°E) | Latitude (°N) | Period start | Period end | Metric                | Type  | Observed   | Modelled   | Refs           |
|-----------------------|----------------|---------------|--------------|------------|-----------------------|-------|------------|------------|----------------|
| Lin'an, Zhejiang      | 119.7          | 30.4          | Feb-01       | Apr-01     | Period 24-h average   | Rural | 34±18      | 32.8       | <sup>90</sup>  |
| Mt Tai, Shandong      | 117.1          | 36.3          | Jul-03       | Nov-03     | Period 24-h average   | NA    | 58±16      | 58.6       | <sup>91</sup>  |
| Beijing               | 117.1          | 40.7          | Sep-03       | Dec-03     | Period 24-h average   | Rural | 26.8±27.7  | 25.9       | <sup>92</sup>  |
| Jinan, Shandong       | 117.1          | 36.7          | 2003         | Spring     | Period 24-h average   | Urban | 38.4       | 40.1       | <sup>93</sup>  |
| Jinan, Shandong       | 117.1          | 36.7          | 2003         | Summer     | Period 24-h average   | Urban | 43.4       | 36.9       | <sup>93</sup>  |
| Jinan, Shandong       | 117.1          | 36.7          | 2003         | Autumn     | Period 24-h average   | Urban | 22.1       | 22.6       | <sup>93</sup>  |
| Jinan, Shandong       | 117.1          | 36.7          | 2003         | Winter     | Period 24-h average   | Urban | 14.3       | 16.5       | <sup>93</sup>  |
| Jinan, Shandong       | 117.1          | 36.7          | 2003         | Summer     | Period 24-h median    | Urban | 37.9       | 36.9       | <sup>93</sup>  |
| Mt Waliguan, Qinghai  | 100.9          | 36.3          | 2003         | Spring     | Period 24-h average   | Rural | 58±9       | 59.4       | <sup>94</sup>  |
| Mt Waliguan, Qinghai  | 100.9          | 36.3          | 2003         | Summer     | Period 24-h average   | Rural | 54±11      | 52.0       | <sup>94</sup>  |
| Beijing               | 117.1          | 40.7          | Jan-04       | Dec-04     | Period 24-h average   | Rural | 30.1±26.7  | 28.5       | <sup>92</sup>  |
| Shanghai              | 121.5          | 31.2          | Mar-04       | Dec-05     | DMA8h                 | Urban | 39.3±1.5   | 38.5       | <sup>95</sup>  |
| Jinan, Shandong       | 117.1          | 36.7          | Apr-04       |            | Period maximum 1-h    | Urban | 105.6      | 101.6      | <sup>96</sup>  |
| Guangzhou, Guangdong  | 113.6          | 22.7          | Apr-04       | May-04     | Period maximum 1-h    | Urban | 178.0      | 91.9       | <sup>97</sup>  |
| Jinan, Shandong       | 117.1          | 36.7          | May-04       |            | Period maximum 1-h    | Urban | 131.4      | 141.3      | <sup>96</sup>  |
| Mt Huang, Anhui       | 118.2          | 30.1          | May-04       |            | Period 24-h average   | Rural | 67.8       | 66.7       | <sup>98</sup>  |
| Mt Tai, Shandong      | 117.2          | 36.4          | May-04       |            | Period 24-h average   | Rural | 64.4       | 55.9       | <sup>98</sup>  |
| Beijing               | 117.1          | 40.7          | May-04       |            | Period 24-h average   | Rural | 42.5       | 40.7       | <sup>98</sup>  |
| Wan-Li, Taiwan        | 121.7          | 25.2          | May-04       |            | Period 24-h average   | Rural | 32.9       | 34.1       | <sup>98</sup>  |
| Hong Kong SAR         | 114.1          | 22.4          | May-04       |            | Period 24-h average   | Urban | 25.5       | 22.3       | <sup>98</sup>  |
| Mt Tai, Shandong      | 117.2          | 36.4          | May-04       |            | Period maximum 1-h    | Urban | 111.0      | 120.4      | <sup>98</sup>  |
| Mt Huang, Anhui       | 118.2          | 30.1          | May-04       |            | Period maximum 1-h    | Rural | 114.0      | 102.3      | <sup>98</sup>  |
| Jinan, Shandong       | 117.1          | 36.7          | Jun-04       |            | Period maximum 1-h    | Urban | 143.8      | 110.8      | <sup>96</sup>  |
| Jinan, Shandong       | 117.1          | 36.7          | Jul-04       |            | Period maximum 1-h    | Urban | 136.2      | 140.8      | <sup>96</sup>  |
| Jinan, Shandong       | 117.1          | 36.7          | Aug-04       |            | Period maximum 1-h    | Urban | 109.0      | 125.4      | <sup>96</sup>  |
| Jinan, Shandong       | 117.1          | 36.7          | Sep-04       |            | Period maximum 1-h    | Urban | 114.3      | 119.1      | <sup>96</sup>  |
| Guangzhou, Guangdong  | 113.6          | 22.6          | Oct-04       | Nov-04     | Period 24-h average   | Rural | 49         | 49.3       | <sup>99</sup>  |
| Guangzhou, Guangdong  | 113.3          | 23.1          | Oct-04       | Nov-04     | Period 24-h average   | Urban | 29         | 29.9       | <sup>99</sup>  |
| Jinan, Shandong       | 117.1          | 36.7          | Oct-04       |            | Period maximum 1-h    | Urban | 107.1      | 102.3      | <sup>96</sup>  |
| Beijing               | 117.1          | 40.7          | Jan-05       | Dec-05     | Period 24-h average   | Rural | 32.8±30.4  | 30.3       | <sup>92</sup>  |
| Shanghai              | 121.1          | 31.5          | May-05       |            | Period maximum 1-h    | Urban | 127        | 100.9      | <sup>97</sup>  |
| Beijing               | 116.3          | 40.4          | Jun-05       | Jul-05     | Period maximum 1-h    | Urban | 286        | 129.7      | <sup>100</sup> |
| Beijing               | 117.1          | 40.7          | Jan-06       | Dec-06     | Period 24-h average   | Rural | 30.9±29.3  | 30.2       | <sup>92</sup>  |
| Mt Tai, Shandong      | 117.1          | 36.3          | May-06       | Jun-06     | Period 24-h average   | Urban | 82         | 89.5       | <sup>101</sup> |
| Shanghai              | 121.4          | 31.2          | Jun-06       | Jun-07     | Period maximum 1-h    | Urban | 128        | 126.3      | <sup>102</sup> |
| Shanghai              | 121.4          | 31.2          | Jun-06       | Jun-07     | Monthly avg daily max | Urban | 17-70      | 15.8-66.7  | <sup>102</sup> |
| Shanghai              | 121.4          | 31.2          | Jun-06       | Jun-07     | Period 24-h average   | Urban | 6-28       | 12.0-29.9  | <sup>102</sup> |
| Lanzhou, Gansu        | 103.7          | 36.1          | Jun-06       | Jul-06     | Period maximum 1-h    | Rural | 143        | 102.0      | <sup>97</sup>  |
| Lanzhou, Gansu        | 103.7          | 36.1          | Jun-06       | Jul-06     | Period 24-h average   | Rural | 53±24      | 48.1       | <sup>103</sup> |
| Beijing               | 115.7          | 39.1          | Jul-06       | Sep-07     | Period maximum 1-h    | Rural | 100.7      | 100.4      | <sup>104</sup> |
| Qingyuan, Guangdong   | 113.0          | 23.5          | Jul-06       |            | Diurnal average       | Rural | 54±18      | 58.8       | <sup>105</sup> |
| Guangzhou, Guangdong  | 113.3          | 23.1          | Jul-06       |            | Diurnal average       | Urban | 51±29      | 53.5       | <sup>105</sup> |
| Mt Waliguan, Qinghai  | 100.9          | 36.3          | Jul-06       | Aug-06     | Period 24-h average   | Rural | 59±8       | 61.0       | <sup>103</sup> |
| Beijing               | 116.8          | 40.5          | Aug-06       |            | Diurnal average       | Rural | 65         | 68.4       | <sup>106</sup> |
| Peking Uni, Beijing   | 116.3          | 40.0          | Aug-06       |            | Period maximum 1-h    | Urban | 123        | 122.3      | <sup>107</sup> |
| Tianjin               | 117.2          | 39.1          | Sep-06       | Oct-06     | Diurnal maximum       | Urban | 117        | 129.1      | <sup>108</sup> |
| Beijing               | 116.4          | 39.9          | Jan-07       | Jan-10     | Period maximum 1-h    | Urban | 60-120     | 47.3-108.2 | <sup>109</sup> |
| Beijing               | 115.7          | 39.1          | Jun-07       |            | Monthly average       | Rural | 54.8±18.1  | 57.3       | <sup>104</sup> |
| Beijing               | 115.7          | 39.1          | Jun-07       |            | DMA8h                 | Rural | 108.6±23.6 | 113.9      | <sup>104</sup> |
| Beijing               | 115.7          | 39.1          | Jun-07       |            | Daily mean values     | Rural | 70.0±13.1  | 78.4       | <sup>104</sup> |
| Beijing               | 117.1          | 40.7          | Jun-07       | Sep-07     | Period 24-h average   | Rural | 58.2±32.1  | 54.2       | <sup>110</sup> |
| Beijing               | 116.3          | 39.8          | Jun-07       | Sep-07     | Period 24-h average   | Urban | 36.2±34.1  | 37.4       | <sup>110</sup> |
| Beijing               | 116.6          | 40.1          | Jun-07       | Sep-07     | Period 24-h average   | Urban | 39.6±36.6  | 37.1       | <sup>110</sup> |
| Beijing               | 116.4          | 39.9          | Jun-07       | Sep-07     | Period 24-h average   | Urban | 47.0±41.6  | 43.7       | <sup>110</sup> |
| Songyuan, Jilin       | 125.0          | 45.0          | Jun-07       |            | Period 24-h average   | Urban | 100        | 99.7       | <sup>111</sup> |
| Beijing               | 116.8          | 40.5          | Aug-07       |            | Diurnal average       | Rural | 50         | 50.2       | <sup>106</sup> |
| Shanghai              | 121.5          | 31.2          | Sep-07       |            | Period 24-h average   | Urban | 20-60      | 32.7       | <sup>112</sup> |
| Guangzhou, Guangdong  | 113.6          | 22.7          | Oct-07       | Dec-07     | Period 24-h average   | Rural | 40±3       | 42.4       | <sup>113</sup> |
| Hong Kong SAR         | 113.9          | 22.3          | Oct-07       | Dec-07     | Period 24-h average   | Urban | 32±1       | 31.0       | <sup>113</sup> |
| Beijing               | 116.3          | 40.0          | Nov-07       | Mar-08     | Period 24-h average   | Urban | 11.9±0.8   | 15.9       | <sup>114</sup> |
| Beijing               | 116.3          | 40.0          | Nov-07       | Mar-08     | Period maximum 1-h    | Urban | 69.7       | 67.2       | <sup>114</sup> |
| Guangzhou, Guangdong  | 113.6          | 22.7          | Nov-07       |            | Period 24-h average   | Rural | 59±5       | 55.9       | <sup>115</sup> |
| Shangri-La, Yunnan    | 99.7           | 28.0          | 2007-2009    | January    | Monthly average       | Rural | 45.4±5.6   | 47.4       | <sup>116</sup> |
| Shangri-La, Yunnan    | 99.7           | 28.0          | 2007-2009    | February   | Monthly average       | Rural | 50.6±5.8   | 51.8       | <sup>116</sup> |
| Shangri-La, Yunnan    | 99.7           | 28.0          | 2007-2009    | March      | Monthly average       | Rural | 57.1±6.9   | 59.4       | <sup>116</sup> |
| Shangri-La, Yunnan    | 99.7           | 28.0          | 2007-2009    | April      | Monthly average       | Rural | 58.3±8.8   | 60.9       | <sup>116</sup> |
| Shangri-La, Yunnan    | 99.7           | 28.0          | 2007-2009    | May        | Monthly average       | Rural | 50.2±9.8   | 49.1       | <sup>116</sup> |
| Shangri-La, Yunnan    | 99.7           | 28.0          | 2007-2009    | June       | Monthly average       | Rural | 37.4±11.6  | 33.6       | <sup>116</sup> |
| Shangri-La, Yunnan    | 99.7           | 28.0          | 2007-2009    | July       | Monthly average       | Rural | 26.8±12.5  | 24.6       | <sup>116</sup> |
| Shangri-La, Yunnan    | 99.7           | 28.0          | 2007-2009    | August     | Monthly average       | Rural | 24.2±8.8   | 26.2       | <sup>116</sup> |
| Shangri-La, Yunnan    | 99.7           | 28.0          | 2007-2009    | September  | Monthly average       | Rural | 29.6±9.2   | 29.0       | <sup>116</sup> |
| Shangri-La, Yunnan    | 99.7           | 28.0          | 2007-2009    | October    | Monthly average       | Rural | 31.4±10.1  | 29.9       | <sup>116</sup> |
| Shangri-La, Yunnan    | 99.7           | 28.0          | 2007-2009    | November   | Monthly average       | Rural | 38.1±7.8   | 35.2       | <sup>116</sup> |
| Shangri-La, Yunnan    | 99.7           | 28.0          | 2007-2009    | December   | Monthly average       | Rural | 39.7±5.0   | 36.3       | <sup>116</sup> |
| Xi'an, Shaanxi        | 108.9          | 34.3          | Jun-08       |            | Monthly average       | Urban | 33.5       | 35.4       | <sup>117</sup> |
| Beijing               | 117.5          | 40.4          | Jul-08       | Aug-08     | Period 24-h average   | Rural | 67.0       | 55.7       | <sup>118</sup> |
| Baoding, Hebei        | 115.5          | 38.9          | Jul-08       | Aug-08     | Period 24-h average   | Rural | 55.3       | 50.5       | <sup>118</sup> |
| Beijing               | 116.0          | 39.5          | Jul-08       | Aug-08     | Period 24-h average   | Rural | 47.1       | 47.7       | <sup>118</sup> |
| Olympic Vill, Beijing | 116.6          | 40.0          | Jul-08       | Aug-08     | Period 24-h average   | Urban | 55.3       | 45.7       | <sup>118</sup> |
| Langfang, Hebei       | 116.8          | 39.6          | Jul-08       | Aug-08     | Period 24-h average   | Rural | 46.8       | 45.7       | <sup>118</sup> |



| Site location       | Longitude (°E) | Latitude (°N) | Period start | Period end | Metric                           | Type  | Observed    | Modelled | Refs |
|---------------------|----------------|---------------|--------------|------------|----------------------------------|-------|-------------|----------|------|
| Beijing             | 116.1          | 40.1          | Jul-08       | Aug-08     | Period 24-h average              | Rural | 46.5        | 45.6     | 118  |
| Beijing             | 116.4          | 40.0          | Jul-08       |            | Period maximum 1-h               | Urban | 190.0       | 116.2    | 119  |
| Peking Uni, Beijing | 116.3          | 40.0          | Aug-08       | Sep-08     | Period maximum 1-h               | Urban | 135.0       | 112.8    | 120  |
| Beijing             | 116.4          | 40.0          | Aug-08       |            | Period maximum 1-h               | Rural | 128.0       | 115.6    | 121  |
| Beijing             | 116.4          | 40.0          | Aug-08       |            | Period maximum 1-h               | Rural | 111.3       | 115.6    | 121  |
| Beijing             | 116.4          | 40.0          | Aug-08       |            | Period maximum 1-h               | Rural | 118.0       | 115.6    | 121  |
| Xi'an, Shaanxi      | 108.9          | 34.3          | 2008         | Spring     | Period 24-h average              | Urban | 21.8±10.1   | 22.3     | 117  |
| Xi'an, Shaanxi      | 108.9          | 34.3          | 2008         | Summer     | Period 24-h average              | Urban | 32.5±11.6   | 31.1     | 117  |
| Xi'an, Shaanxi      | 108.9          | 34.3          | 2008         | Autumn     | Period 24-h average              | Urban | 8.8±8.1     | 21.0     | 117  |
| Xi'an, Shaanxi      | 108.9          | 34.3          | 2009         | Winter     | Period 24-h average              | Urban | 3.0±2.5     | 15.3     | 117  |
| Tianjin             | 117.2          | 39.1          | Jan-09       | Dec-15     | DMA8h                            | Urban | 120.0       | 115.9    | 122  |
| Tianjin             | 117.0          | 39.4          | Jul-09       | Sep-09     | Period maximum 1-h               | Rural | 193.7       | 160.4    | 123  |
| Tianjin             | 117.2          | 39.1          | Jul-09       | Sep-09     | Period maximum 1-h               | Urban | 130.4       | 139.0    | 123  |
| Beijing             | 116.4          | 40.0          | Jul-10       |            | Period 24-h average              | Urban | 3.1-66.3    | 36.4     | 124  |
| Beijing             | 116.0          | 39.7          | Jul-10       |            | Period 24-h average              | Urban | 8.2-105.1   | 35.8     | 124  |
| Beijing             | 116.0          | 39.7          | Aug-10       |            | Period 24-h average              | Urban | 22.3-89.1   | 33.7     | 124  |
| Beijing             | 116.4          | 40.0          | Aug-10       |            | Period 24-h average              | Urban | 11.7-53.1   | 33.2     | 124  |
| Hong Kong SAR       | 114.1          | 22.4          | Oct-10       |            | Period 24-h average              | Urban | 31.9-47.5   | 65.7     | 125  |
| Nam Co, Tibet       | 91.0           | 30.8          | Jan-11       | Dec-11     | Period 24-h average              | Rural | 23.5±6.2    | 42.6     | 126  |
| Mt Huang, Anhui     | 118.2          | 30.1          | Jun-11       |            | Period 24-h average              | Rural | 12.8-51.0   | 39.8     | 127  |
| Beijing             | 116.0          | 39.7          | Jul-11       |            | Period 24-h average              | Urban | 36.3-80.8   | 52.2     | 124  |
| Beijing             | 116.4          | 40.0          | Jul-11       |            | Period 24-h average              | Urban | 4.6-54.1    | 37.3     | 124  |
| Beijing             | 116.0          | 39.7          | Aug-11       |            | Period 24-h average              | Urban | 30.9-74.6   | 35.4     | 124  |
| Beijing             | 116.4          | 40.0          | Aug-11       |            | Period 24-h average              | Urban | 6.6-56.1    | 33.9     | 124  |
| Nanjing, Jiangsu    | 119.0          | 32.1          | Aug-11       |            | Monthly average                  | Rural | 23.7        | 29.1     | 128  |
| Nanjing, Jiangsu    | 119.0          | 32.1          | Sep-11       |            | Monthly average                  | Rural | 29.2        | 27.5     | 128  |
| Nanjing, Jiangsu    | 119.0          | 32.1          | Oct-11       |            | Monthly average                  | Rural | 22.8        | 27.7     | 128  |
| Nanjing, Jiangsu    | 119.0          | 32.1          | Nov-11       |            | Monthly average                  | Rural | 7.4         | 18.5     | 128  |
| Nanjing, Jiangsu    | 119.0          | 32.1          | Dec-11       |            | Monthly average                  | Rural | 8.6         | 12.4     | 128  |
| Nanjing, Jiangsu    | 119.0          | 32.1          | Jan-12       |            | Monthly average                  | Rural | 16.3        | 14.4     | 128  |
| Nam Co, Tibetan     | 91.0           | 30.8          | Jan-12       | Dec-12     | Period 24-h average              | Rural | 48.1±11.4   | 44.0     | 126  |
| Nanjing, Jiangsu    | 119.0          | 32.1          | Feb-12       |            | Monthly average                  | Rural | 15.5        | 18.5     | 128  |
| Nanjing, Jiangsu    | 119.0          | 32.1          | Mar-12       |            | Monthly average                  | Rural | 17.1        | 20.0     | 128  |
| Nanjing, Jiangsu    | 119.0          | 32.1          | Apr-12       |            | Monthly average                  | Rural | 21.8        | 20.0     | 128  |
| Nanjing, Jiangsu    | 119.0          | 32.1          | May-12       |            | Monthly average                  | Rural | 20.4        | 23.5     | 128  |
| Nanjing, Jiangsu    | 119.0          | 32.1          | Jun-12       |            | Monthly average                  | Rural | 27.1        | 25.3     | 128  |
| Nanjing, Jiangsu    | 119.0          | 32.1          | Jul-12       |            | Monthly average                  | Rural | 31.3        | 25.8     | 128  |
| Nam Co, Tibetan     | 91.0           | 30.8          | Jan-13       | Dec-13     | Period 24-h average              | Rural | 47.5±12.3   | 42.2     | 126  |
| Wuhan, Hubei        | 114.4          | 30.5          | Feb-13       | Oct-14     | Daily Maximum average            | Urban | 85.0        | 81.4     | 129  |
| Nanjing, Jiangsu    | 118.7          | 32.2          | Jun-13       | Aug-13     | Period maximum 1-h               | Urban | 110.6       | 114.8    | 130  |
| Nanjing, Jiangsu    | 118.7          | 32.2          | Jun-13       | Aug-13     | Period maximum 1-h               | Urban | 129.2       | 114.8    | 130  |
| Nanjing, Jiangsu    | 118.7          | 32.2          | Jun-13       | Aug-13     | Period maximum 1-h               | Urban | 135.1       | 114.8    | 130  |
| Nanjing, Jiangsu    | 118.7          | 32.1          | Jun-13       | Aug-13     | Period maximum 1-h               | Urban | 134.1       | 114.8    | 130  |
| Lanzhou, Gansu      | 103.8          | 36.1          | Jun-13       | Jul-13     | Diurnal maximum                  | Urban | 48-98       | 83.3     | 131  |
| Lanzhou, Gansu      | 103.7          | 36.1          | Jun-13       | Jul-13     | Diurnal maximum                  | Rural | 66-138      | 88.3     | 131  |
| Hangzhou, Zhejiang  | 120.2          | 30.3          | Jul-13       | Aug-13     | Period 24-h average              | Urban | 45.5±15.1   | 52.5     | 132  |
| Hangzhou, Zhejiang  | 120.3          | 30.3          | Jul-13       | Aug-13     | Period 24-h average              | Rural | 42.0±10.8   | 36.8     | 132  |
| Hangzhou, Zhejiang  | 119.0          | 29.6          | Jul-13       | Aug-13     | Period 24-h average              | Rural | 42.0±10.8   | 36.0     | 132  |
| Fudan Uni, Shanghai | 121.5          | 31.3          | Aug-13       |            | DMA8h                            | Urban | 15.8-117.0  | 81.1     | 133  |
| Hong Kong SAR       | 114.1          | 22.4          | Nov-13       | Dec-13     | Period 24-h average              | Rural | 30.6-32.7   | 58.5     | 134  |
| Nam Co, Tibetan     | 91.0           | 30.8          | Jan-14       | Dec-14     | Period 24-h average              | Rural | 24.2±5.4    | 45.3     | 126  |
| North China         | 114.5-119.5    | 36.5-40.5     | May-14       | Jul-17     | DMA8h                            | NA    | 98.5        | 104.3    | 135  |
| North China         | 114.5-119.5    | 36.5-40.5     | May-14       | Jul-17     | Maximum of DMA8h                 | NA    | 124.4       | 116.2    | 135  |
| Ningbo, Zhejiang    | 121.5          | 29.9          | Sep-14       | Aug-15     | Period hourly average            | Urban | 11-39       | 21.9     | 136  |
| Ningbo, Zhejiang    | 121.6          | 29.8          | Sep-14       | Aug-15     | Period hourly average            | Rural | 22-53       | 30.2     | 136  |
| Ningbo, Zhejiang    | 121.9          | 29.8          | Sep-14       | Aug-15     | Period hourly average            | Rural | 22-53       | 30.3     | 136  |
| Mt Tai, Shandong    | 117.0          | 36.3          | Jan-15       | Dec-15     | Daily maximum average            | NA    | ~100        | 58.3     | 137  |
| Nam Co, Tibetan     | 91.0           | 30.8          | Jan-15       | Dec-15     | Period 24-h average              | Rural | 48.9±12.0   | 46.1     | 126  |
| Kashgar, Xinjiang   | 76.0           | 39.5          | 2015         | Autumn     | Period 24-h average              | Urban | 13.9        | 20.7     | 138  |
| Nanjing, Jiangsu    | 118.8          | 32.1          | Jan-16       | Dec-16     | DM8h 90 <sup>th</sup> percentile | Urban | 93.9        | 75.5     | 139  |
| Shanghai            | 121.5          | 30.8          | May-16       |            | DMA8h                            | Rural | 106.4       | 104.1    | 140  |
| Hangzhou, Zhejiang  | 120.2          | 30.2          | Aug-16       | Sep-16     | Period 24-h average              | Urban | 64.7        | 32.1     | 141  |
| Hangzhou, Zhejiang  | 120.2          | 30.2          | Sep-16       |            | Period 24-h average              | Urban | 38.4        | 32.1     | 141  |
| Kashgar, Xinjiang   | 76.0           | 39.5          | 2016         | Spring     | Period 24-h average              | Urban | 16.2        | 22.1     | 138  |
| Shanghai            | 121.5          | 30.8          | Dec-17       |            | Period 24-h average              | Rural | 35.0        | 37.5     | 142  |
| Shanghai            | 121.4          | 31.2          | 2017         | Autumn     | Period maximum 1-h               | Urban | 146.0       | 122.9    | 143  |
| Kashgar, Xinjiang   | 76.0           | 39.5          | 2017         | Summer     | Period 24-h average              | Urban | 29.6        | 30.2     | 138  |
| Fuzhou, Fujian      | 119.3          | 26.1          | May-18       |            | Period 24-h average              | Urban | 24.6        | 22.2     | 144  |
| Fuzhou, Fujian      | 119.4          | 26.0          | May-18       |            | Period 24-h average              | Urban | 20.6        | 22.0     | 144  |
| Shenzhen, Guangdong | 114.0          | 22.6          | Sep-18       | Oct-18     | Period maximum 1-h               | Urban | 121.0       | 101.5    | 145  |
| Shanghai            | 121.4          | 31.2          | 2018         | Spring     | Period maximum 1-h               | Urban | 137.0       | 121.3    | 143  |
| Kashgar, Xinjiang   | 76.0           | 39.5          | 2018         | Winter     | Period 24-h average              | Urban | 5.4         | 20.3     | 138  |
| Shanghai            | 121.5          | 31.3          | May-19       | Sep-19     | Period 24-h average              | Urban | 35.14±18.72 | 32.5     | 146  |
| Shanghai            | 121.4          | 31.2          | 2019         | Summer     | Period maximum 1-h               | Urban | 185.0       | 162.7    | 143  |
| Shanghai            | 121.4          | 31.2          | 2019         | Winter     | Period maximum 1-h               | Urban | 76.7        | 80.2     | 143  |

## REFERENCES

1. Sun Z, Archibald AT. Multi-stage ensemble-learning-based model fusion for surface ozone simulations: A focus on CMIP6 models. *Environ Sci Ecotechnol* 2021; **8**: 100124.
2. Sun H, Shin YM, Xia M, et al. Spatial Resolved Surface Ozone with Urban and Rural Differentiation during 1990-2019: A Space-Time Bayesian Neural Network Downscaler. *Environ Sci Technol* 2022; **56**(11): 7337-49.
3. Wu TW, Zhang F, Zhang J, et al. Beijing Climate Center Earth System Model version 1 (BCC-ESM1): model description and evaluation of aerosol simulations. *Geosci Model Dev* 2020; **13**(3): 977-1005.
4. Danabasoglu G, Lamarque JF, Bacmeister J, et al. The Community Earth System Model Version 2 (CESM2). *J Adv Model Earth Sy* 2020; **12**(2): e2019MS001916.
5. van Noije T, Bergman T, Le Sager P, et al. EC-Earth3-AerChem: a global climate model with interactive aerosols and atmospheric chemistry participating in CMIP6. *Geosci Model Dev* 2021; **14**(9): 5637-68.
6. Dunne JP, Horowitz LW, Adcroft AJ, et al. The GFDL Earth System Model Version 4.1 (GFDL-ESM 4.1): Overall Coupled Model Description and Simulation Characteristics. *J Adv Model Earth Sy* 2020; **12**(11): e2019MS002015.
7. Miller RL, Schmidt GA, Nazarenko LS, et al. CMIP6 Historical Simulations (1850-2014) With GISS-E2.1. *J Adv Model Earth Sy* 2021; **13**(1): e2019MS002034.
8. Yukimoto S, Kawai H, Koshiro T, et al. The Meteorological Research Institute Earth System Model Version 2.0, MRI-ESM2.0: Description and Basic Evaluation of the Physical Component. *J Meteorol Soc Jpn* 2019; **97**(5): 931-65.
9. Sellar AA, Jones CG, Mulcahy JP, et al. UKESM1: Description and Evaluation of the U.K. Earth System Model. *J Adv Model Earth Sy* 2019; **11**(12): 4513-58.
10. Hegglin M, Kinnison D, Lamarque J-F, Plummer D. CCMI ozone in support of CMIP6 - version 1.0. Earth System Grid Federation; 2016.
11. Schultz MG, Schroder S, Lyapina O, et al. Tropospheric Ozone Assessment Report: Database and metrics data of global surface ozone observations. *Elementa-Sci Anthropol* 2017; **5**(58): 1-26.
12. Sengupta U, Amos M, Hosking S, Rasmussen CE, Juniper M, Young P. Ensembling geophysical models with Bayesian neural networks. *Adv Neural Inf Process Syst* 2020; **33**: 1205-17.
13. Byun G, Choi Y, Kim S, Lee JT. Long-term exposure to ambient ozone and mortality in a population-based cohort of South Korea: Considering for an alternative exposure time metric. *Environ Pollut* 2022; **314**: 120300.
14. Sun HZ, Yu P, Lan C, et al. Cohort-based long-term ozone exposure-associated mortality risks with adjusted metrics: A systematic review and meta-analysis. *The Innovation* 2022; **3**(3): 100246.
15. Global Burden of Disease Mortality and Causes of Death Collaborators. GBD 2019 Results. 2022. <http://ghdx.healthdata.org/gbd-results-tool>.
16. Zheng P, Barber R, Sorensen RJD, Murray CJL, Aravkin AY. Trimmed Constrained Mixed Effects Models: Formulations and Algorithms. *J Comput Graph Stat* 2021; **30**(3): 544-56.
17. Murray CJL, Aravkin AY, Zheng P, et al. Global burden of 87 risk factors in 204 countries and territories, 1990-2019: a systematic analysis for the Global Burden of Disease Study 2019. *Lancet* 2020; **396**(10258): 1223-49.
18. Burnett RT, Pope III CA, Ezzati M, et al. An integrated risk function for estimating the global burden of disease attributable to ambient fine particulate matter exposure. *Environ Health Persp* 2014; **122**(4): 397-403.
19. Global Burden of Disease Collaborative Network. Ambient ozone pollution – Level 3 risk. 2020. [https://www.healthdata.org/results/gbd\\_summaries/2019/ambient-ozone-pollution-level-3-risk](https://www.healthdata.org/results/gbd_summaries/2019/ambient-ozone-pollution-level-3-risk).
20. Yin P, Brauer M, Cohen AJ, et al. The effect of air pollution on deaths, disease burden, and life expectancy across China and its provinces, 1990-2017: an analysis for the Global Burden of Disease Study 2017. *Lancet Planet Health* 2020; **4**(9): e386-e98.
21. Jerrett M, Burnett RT, Pope III CA, et al. Long-term ozone exposure and mortality. *N Engl J Med* 2009; **360**(11): 1085-95.
22. Malley CS, Henze DK, Kuynlenstierna JCI, et al. Updated Global Estimates of Respiratory Mortality in Adults ≥30 Years of Age Attributable to Long-Term Ozone Exposure. *Environ Health Persp* 2017; **125**(8): 087021.
23. Center for International Earth Science Information Network (Columbia University). Gridded Population of the World, Version 4 (GPWv4): Population Count Adjusted to Match 2015 Revision of UN WPP Country Totals, Revision 11. Palisades, New York: NASA Socioeconomic Data and Applications Center (SEDAC); 2018.
24. Yang J, Zhou M, Ren Z, et al. Projecting heat-related excess mortality under climate change scenarios in China. *Nat Commun* 2021; **12**(1): 1039.
25. Jones B, O'Neill BC. Spatially explicit global population scenarios consistent with the Shared Socioeconomic Pathways. *Environ Res Lett* 2016; **11**(8): 084003.
26. Global Burden of Disease Collaborative Network. Global Burden of Disease Study 2019 (GBD 2019) Population Estimates 1950–2019. Seattle, WA: Institute for Health Metrics and Evaluation; 2020.
27. National Bureau of Statistics of China. China Statistical Yearbook 1981–2021. [www.yearbookchina.com](http://www.yearbookchina.com). 2022.
28. Liu X, Zhu YJ, Xue L, Desai AR, Wang HK. Cluster-Enhanced Ensemble Learning for Mapping Global Monthly Surface Ozone From 2003 to 2019. *Geophys Res Lett* 2022; **49**(11): e2022GL097947.



29. Zhou M, Wang H, Zeng X, et al. Mortality, morbidity, and risk factors in China and its provinces, 1990-2017: a systematic analysis for the Global Burden of Disease Study 2017. *Lancet* 2019; **394**(10204): 1145-58.
30. Niu Y, Zhou Y, Chen R, et al. Long-term exposure to ozone and cardiovascular mortality in China: a nationwide cohort study. *Lancet Planet Health* 2022; **6**(6): e496-e503.
31. Liu S, Zhang Y, Ma R, et al. Long-term exposure to ozone and cardiovascular mortality in a large Chinese cohort. *Environ Int* 2022; **165**: 107280.
32. Wang R, Tao S, Ciais P, et al. High-resolution mapping of combustion processes and implications for CO<sub>2</sub> emissions. *Atmos Chem Phys* 2013; **13**(10): 5189-203.
33. Liu Z, Guan D, Wei W, et al. Reduced carbon emission estimates from fossil fuel combustion and cement production in China. *Nature* 2015; **524**(7565): 335-8.
34. Zhong Q, Huang Y, Shen H, et al. Global estimates of carbon monoxide emissions from 1960 to 2013. *Environ Sci Pollut Res Int* 2017; **24**(1): 864-73.
35. Huang Y, Shen H, Chen H, et al. Quantification of global primary emissions of PM<sub>2.5</sub>, PM<sub>10</sub>, and TSP from combustion and industrial process sources. *Environ Sci Technol* 2014; **48**(23): 13834-43.
36. Wang R, Tao S, Balkanski Y, et al. Exposure to ambient black carbon derived from a unique inventory and high-resolution model. *Proc Natl Acad Sci USA* 2014; **111**(7): 2459-63.
37. Huang Y, Shen HZ, Chen YL, et al. Global organic carbon emissions from primary sources from 1960 to 2009. *Atmos Environ* 2015; **122**: 505-12.
38. Zhong Q, Shen H, Yun X, et al. Global Sulfur Dioxide Emissions and the Driving Forces. *Environ Sci Technol* 2020; **54**(11): 6508-17.
39. Zhong QR, Shen HZ, Yun X, et al. Effects of International Fuel Trade on Global Sulfur Dioxide Emissions. *Environ Sci Tech Let* 2019; **6**(12): 727-31.
40. Huang T, Zhu X, Zhong Q, et al. Spatial and Temporal Trends in Global Emissions of Nitrogen Oxides from 1960 to 2014. *Environ Sci Technol* 2017; **51**(14): 7992-8000.
41. Meng W, Zhong Q, Yun X, et al. Improvement of a Global High-Resolution Ammonia Emission Inventory for Combustion and Industrial Sources with New Data from the Residential and Transportation Sectors. *Environ Sci Technol* 2017; **51**(5): 2821-9.
42. Shen H, Huang Y, Wang R, et al. Global atmospheric emissions of polycyclic aromatic hydrocarbons from 1960 to 2008 and future predictions. *Environ Sci Technol* 2013; **47**(12): 6415-24.
43. Huang X, Li MM, Li JF, Song Y. A high-resolution emission inventory of crop burning in fields in China based on MODIS Thermal Anomalies/Fire products. *Atmos Environ* 2012; **50**: 9-15.
44. Huang Z, Zhong Z, Sha Q, et al. An updated model-ready emission inventory for Guangdong Province by incorporating big data and mapping onto multiple chemical mechanisms. *Sci Total Environ* 2021; **769**: 144535.
45. Kang YN, Liu MX, Song Y, et al. High-resolution ammonia emissions inventories in China from 1980 to 2012. *Atmos Chem Phys* 2016; **16**(4): 2043-58.
46. Liu H, Fu ML, Jin XX, et al. Health and climate impacts of ocean-going vessels in East Asia. *Nat Clim Change* 2016; **6**(11): 1037-41.
47. Zheng B, Cheng J, Geng GN, et al. Mapping anthropogenic emissions in China at 1 km spatial resolution and its application in air quality modeling. *Chinese Sci Bull* 2021; **66**(6): 612-20.
48. Zhou YD, Zhao Y, Mao P, et al. Development of a high-resolution emission inventory and its evaluation and application through air quality modeling for Jiangsu Province, China. *Atmos Chem Phys* 2017; **17**(1): 211-33.
49. Zhou Y, Zhang Y, Zhao B, et al. Estimating air pollutant emissions from crop residue open burning through a calculation of open burning proportion based on satellite-derived fire radiative energy. *Environ Pollut* 2021; **286**: 117477.
50. Hurtt GC, Chini L, Sahajpal R, et al. Harmonisation of global land use change and management for the period 850-2100 (LUH2) for CMIP6. *Geosci Model Dev* 2020; **13**(11): 5425-64.
51. Popp A, Calvin K, Fujimori S, et al. Land-use futures in the shared socio-economic pathways. *Global Environ Chang* 2017; **42**: 331-45.
52. Abbey DE, Nishino N, McDonnell WF, et al. Long-term inhalable particles and other air pollutants related to mortality in nonsmokers. *Am J Respir Crit Care Med* 1999; **159**(2): 373-82.
53. Lipfert FW, Wyzga RE, Baty JD, Miller JP. Traffic density as a surrogate measure of environmental exposures in studies of air pollution health effects: Long-term mortality in a cohort of US veterans. *Atmos Environ* 2006; **40**(1): 154-69.
54. Krewski D, Jerrett M, Burnett RT, et al. Extended follow-up and spatial analysis of the American Cancer Society study linking particulate air pollution and mortality: Health Effects Institute Boston, MA; 2009.
55. Smith KR, Jerrett M, Anderson HR, et al. Public health benefits of strategies to reduce greenhouse-gas emissions: health implications of short-lived greenhouse pollutants. *Lancet* 2009; **374**(9707): 2091-103.
56. Lipsett MJ, Ostro BD, Reynolds P, et al. Long-term exposure to air pollution and cardiorespiratory disease in the California teachers study cohort. *Am J Respir Crit Care Med* 2011; **184**(7): 828-35.
57. Zanobetti A, Schwartz J. Ozone and survival in four cohorts with potentially predisposing diseases. *Am J Respir Crit Care Med* 2011; **184**(7): 836-41.
58. Carey IM, Atkinson RW, Kent AJ, van Staa T, Cook DG, Anderson HR. Mortality associations with long-term exposure to outdoor air pollution in a national English cohort. *Am J Respir Crit Care Med* 2013; **187**(11): 1226-33.
59. Jerrett M, Burnett RT, Beckerman BS, et al. Spatial analysis of air pollution and mortality in California. *Am J Respir Crit Care Med* 2013; **188**(5): 593-9.

60. Bentayeb M, Wagner V, Stempfelet M, et al. Association between long-term exposure to air pollution and mortality in France: A 25-year follow-up study. *Environ Int* 2015; **85**: 5-14.
61. Crouse DL, Peters PA, Hystad P, et al. Ambient PM<sub>2.5</sub>, O<sub>3</sub>, and NO<sub>2</sub> Exposures and Associations with Mortality over 16 Years of Follow-Up in the Canadian Census Health and Environment Cohort (CanCHEC). *Environ Health Persp* 2015; **123**(11): 1180-6.
62. Tonne C, Halonen JI, Beevers SD, et al. Long-term traffic air and noise pollution in relation to mortality and hospital readmission among myocardial infarction survivors. *Int J Hyg Envir Heal* 2016; **219**(1): 72-8.
63. Turner MC, Jerrett M, Pope III CA, et al. Long-Term Ozone Exposure and Mortality in a Large Prospective Study. *Am J Respir Crit Care Med* 2016; **193**(10): 1134-42.
64. Di Q, Wang Y, Zanobetti A, et al. Air Pollution and Mortality in the Medicare Population. *N Engl J Med* 2017; **376**(26): 2513-22.
65. Weichenthal S, Pinault LL, Burnett RT. Impact of Oxidant Gases on the Relationship between Outdoor Fine Particulate Air Pollution and Nonaccidental, Cardiovascular, and Respiratory Mortality. *Sci Rep* 2017; **7**(1): 16401.
66. Cakmak S, Hebborn C, Pinault L, et al. Associations between long-term PM<sub>2.5</sub> and ozone exposure and mortality in the Canadian Census Health and Environment Cohort (CANCHEC), by spatial synoptic classification zone. *Environ Int* 2018; **111**: 200-11.
67. Hvidtfeldt UA, Sorensen M, Geels C, et al. Long-term residential exposure to PM<sub>2.5</sub>, PM<sub>10</sub>, black carbon, NO<sub>2</sub>, and ozone and mortality in a Danish cohort. *Environ Int* 2019; **123**: 265-72.
68. Kazemparkouhi F, Eum KD, Wang B, Manjourides J, Suh HH. Long-term ozone exposures and cause-specific mortality in a US Medicare cohort. *J Expo Sci Environ Epidemiol* 2020; **30**(4): 650-8.
69. Lim CC, Hayes RB, Ahn J, et al. Long-Term Exposure to Ozone and Cause-Specific Mortality Risk in the United States. *Am J Respir Crit Care Med* 2019; **200**(8): 1022-31.
70. Paul LA, Burnett RT, Kwong JC, et al. The impact of air pollution on the incidence of diabetes and survival among prevalent diabetes cases. *Environ Int* 2020; **134**: 105333.
71. Shi L, Rosenberg A, Wang Y, et al. Low-Concentration Air Pollution and Mortality in American Older Adults: A National Cohort Analysis (2001-2017). *Environ Sci Technol* 2022; **56**(11): 7194-202.
72. Strak M, Weinmayr G, Rodopoulou S, et al. Long term exposure to low level air pollution and mortality in eight European cohorts within the ELAPSE project: pooled analysis. *BMJ* 2021; **374**: n1904.
73. Yazdi MD, Wang Y, Di Q, et al. Long-term effect of exposure to lower concentrations of air pollution on mortality among US Medicare participants and vulnerable subgroups: a doubly-robust approach. *Lancet Planet Health* 2021; **5**(10): E689-E97.
74. Bauwelinck M, Chen J, de Hoogh K, et al. Variability in the association between long-term exposure to ambient air pollution and mortality by exposure assessment method and covariate adjustment: A census-based country-wide cohort study. *Sci Total Environ* 2022; **804**: 150091.
75. Stafoggia M, Oftedal B, Chen J, et al. Long-term exposure to low ambient air pollution concentrations and mortality among 28 million people: results from seven large European cohorts within the ELAPSE project. *Lancet Planet Health* 2022; **6**(1): E9-E18.
76. So R, Andersen ZJ, Chen J, et al. Long-term exposure to air pollution and mortality in a Danish nationwide administrative cohort study: Beyond mortality from cardiopulmonary disease and lung cancer. *Environ Int* 2022; **164**: 107241.
77. Yuan Y, Wang K, Sun HZ, et al. Excess mortality associated with high ozone exposure: A national cohort study in China. *Environ Sci Ecotechnol* 2023: 100241.
78. United States Environmental Protection Agency. Air Quality Criteria for Ozone and Related Photochemical Oxidants, 2006.
79. Zheng Y, Stevenson KJ, Barrowcliffe R, Chen S, Wang H, Barnes JD. Ozone levels in Chongqing: a potential threat to crop plants commonly grown in the region? *Environ Pollut* 1998; **99**(3): 299-308.
80. Wang T, Lam KS, Lee ASY, Pang SW, Tsui WS. Meteorological and chemical characteristics of the photochemical ozone episodes observed at Cape D'Aguiar in Hong Kong. *J Appl Meteorol* 1998; **37**(10): 1167-78.
81. Li X, He Z, Fang X, Zhou X. Distribution of surface ozone concentration in the clean areas of china and its possible impact on crop yields. *Adv Atmos Sci* 1999; **16**(1): 154-8.
82. Xu WY, Lin WL, Xu XB, et al. Long-term trends of surface ozone and its influencing factors at the Mt Waliguan GAW station, China - Part 1: Overall trends and characteristics. *Atmos Chem Phys* 2016; **16**(10): 6191-205.
83. Kok GL, Lind JA, Fang M. An airborne study of air quality around the Hong Kong Territory. *J Geophys Res-Atmos* 1997; **102**(D15): 19043-57.
84. Luo C, John JCS, Zhou XJ, Lam KS, Wang T, Chameides WL. A nonurban ozone air pollution episode over eastern China: Observations and model simulations. *J Geophys Res-Atmos* 2000; **105**(D2): 1889-908.
85. Zhang Y, Jin JL, Yan P, et al. Long-term variations of major atmospheric compositions observed at the background stations in three key areas of China. *Adv Clim Chang Res* 2020; **11**(4): 370-80.
86. Wang T, Cheung TF, Li YS, Yu XM, Blake DR. Emission characteristics of CO, NO<sub>x</sub>, SO<sub>2</sub> and indications of biomass burning observed at a rural site in eastern China. *J Geophys Res-Atmos* 2002; **107**(D12): ACH-9.
87. Tu J, Xia ZG, Wang HS, Li WQ. Temporal variations in surface ozone and its precursors and meteorological effects at an urban site in China. *Atmos Res* 2007; **85**(3-4): 310-37.
88. Wang T, Cheung VTF, Anson M, Li YS. Ozone and related gaseous pollutants in the boundary layer of eastern China: Overview of the recent measurements at a rural site. *Geophys Res Lett* 2001; **28**(12): 2373-6.
89. Zhang Y, Huang W, London SJ, et al. Ozone and daily mortality in Shanghai, China. *Environ Health Persp* 2006; **114**(8): 1227-32.
90. Wang T, Wong CH, Cheung TF, et al. Relationships of trace gases and aerosols and the emission characteristics at Lin'an, a rural site in eastern China, during spring 2001. *J Geophys Res-Atmos* 2004; **109**(D19): S05.

91. Gao J, Wang T, Ding AJ, Liu CB. Observational study of ozone and carbon monoxide at the summit of mount Tai (1534m a.s.l.) in central-eastern China. *Atmos Environ* 2005; **39**(26): 4779-91.
92. Meng ZY, Xu XB, Yan P, et al. Characteristics of trace gaseous pollutants at a regional background station in Northern China. *Atmos Chem Phys* 2009; **9**(3): 927-36.
93. Shan W, Yin Y, Zhang J, Ji X, Deng X. Surface ozone and meteorological condition in a single year at an urban site in central-eastern China. *Environ Monit Assess* 2009; **151**(1-4): 127-41.
94. Wang T, Wong HLA, Tang J, Ding A, Wu WS, Zhang XC. On the origin of surface ozone and reactive nitrogen observed at a remote mountain site in the northeastern Qinghai-Tibetan Plateau, western China. *J Geophys Res-Atmos* 2006; **111**(D8).
95. Huang W, Tan J, Kan H, et al. Visibility, air quality and daily mortality in Shanghai, China. *Sci Total Environ* 2009; **407**(10): 3295-300.
96. Shan WP, Yin YQ, Lu HX, Liang SX. A meteorological analysis of ozone episodes using HYSPLIT model and surface data. *Atmos Res* 2009; **93**(4): 767-76.
97. Xue LK, Wang T, Gao J, et al. Ground-level ozone in four Chinese cities: precursors, regional transport and heterogeneous processes. *Atmos Chem Phys* 2014; **14**(23): 13175-88.
98. Wang ZF, Li J, Wang XQ, Pochanart P, Akimoto H. Modeling of regional high ozone episode observed at two mountain sites (Mt. Tai and Huang) in East China. *J Atmos Chem* 2006; **55**(3): 253-72.
99. Zhang YH, Hu M, Zhong LJ, et al. Regional Integrated Experiments on Air Quality over Pearl River Delta 2004 (PRIDE-PRD2004): Overview. *Atmos Environ* 2008; **42**(25): 6157-73.
100. Wang T, Ding AJ, Gao J, Wu WS. Strong ozone production in urban plumes from Beijing, China. *Geophys Res Lett* 2006; **33**(21): 806-10.
101. Kanaya Y, Akimoto H, Wang ZF, et al. Overview of the Mount Tai Experiment (MTX2006) in central East China in June 2006: studies of significant regional air pollution. *Atmos Chem Phys* 2013; **13**(16): 8265-83.
102. Ran L, Zhao CS, Geng FH, et al. Ozone photochemical production in urban Shanghai, China: Analysis based on ground level observations. *J Geophys Res-Atmos* 2009; **114**(D15): 301-14.
103. Zhang JM, Wang T, Ding AJ, et al. Continuous measurement of peroxyacetyl nitrate (PAN) in suburban and remote areas of western China. *Atmos Environ* 2009; **43**(2): 228-37.
104. Lin WL, Xu XB, Ge BZ, Zhang XC. Characteristics of gaseous pollutants at Gucheng, a rural site southwest of Beijing. *J Geophys Res-Atmos* 2009; **114**(D2): G14.
105. Lu KD, Zhang YH, Su H, et al. Regional ozone pollution and key controlling factors of photochemical ozone production in Pearl River Delta during summer time. *Sci China Chem* 2010; **53**(3): 651-63.
106. Wang Y, Hao J, McElroy MB, et al. Ozone air quality during the 2008 Beijing Olympics: effectiveness of emission restrictions. *Atmos Chem Phys* 2009; **9**(14): 5237-51.
107. Chou CCK, Tsai CY, Shiu CJ, Liu SC, Zhu T. Measurement of NO<sub>y</sub> during Campaign of Air Quality Research in Beijing 2006 (CAREBeijing-2006): Implications for the ozone production efficiency of NO<sub>x</sub>. *J Geophys Res-Atmos* 2009; **114**(D2): G01.
108. Han S, Bian H, Feng Y, et al. Analysis of the Relationship between O<sub>3</sub>, NO and NO<sub>2</sub> in Tianjin, China. *Aerosol Air Qual Res* 2011; **11**(2): 128-39.
109. Chen PF, Quan JN, Zhang Q, et al. Measurements of vertical and horizontal distributions of ozone over Beijing from 2007 to 2010. *Atmos Environ* 2013; **74**: 37-44.
110. Xu J, Ma JZ, Zhang XL, et al. Measurements of ozone and its precursors in Beijing during summertime: impact of urban plumes on ozone pollution in downwind rural areas. *Atmos Chem Phys* 2011; **11**(23): 12241-52.
111. Ding A, Wang T, Xue L, et al. Transport of north China air pollution by midlatitude cyclones: Case study of aircraft measurements in summer 2007. *J Geophys Res* 2009; **114**(D8): 304-19.
112. Geng F, Zhang Q, Tie X, et al. Aircraft measurements of O<sub>3</sub>, NO<sub>x</sub>, CO, VOCs, and SO<sub>2</sub> in the Yangtze River Delta region. *Atmos Environ* 2009; **43**(3): 584-93.
113. Guo H, Jiang F, Cheng HR, et al. Concurrent observations of air pollutants at two sites in the Pearl River Delta and the implication of regional transport. *Atmos Chem Phys* 2009; **9**(19): 7343-60.
114. Lin W, Xu X, Ge B, Liu X. Gaseous pollutants in Beijing urban area during the heating period 2007-2008: variability, sources, meteorological, and chemical impacts. *Atmos Chem Phys* 2011; **11**(15): 8157-70.
115. Zhang YL, Wang XM, Blake DR, et al. Aromatic hydrocarbons as ozone precursors before and after outbreak of the 2008 financial crisis in the Pearl River Delta region, south China. *J Geophys Res-Atmos* 2012; **117**(D15): 306-321.
116. Ma J, Lin WL, Zheng XD, Xu XB, Li Z, Yang LL. Influence of air mass downward transport on the variability of surface ozone at Xianggelila Regional Atmosphere Background Station, southwest China. *Atmos Chem Phys* 2014; **14**(11): 5311-25.
117. Wang X, Shen Z, Cao J, et al. Characteristics of surface ozone at an urban site of Xi'an in Northwest China. *J Environ Monit* 2012; **14**(1): 116-26.
118. Gao Y, Zhang M. Sensitivity analysis of surface ozone to emission controls in Beijing and its neighboring area during the 2008 Olympic Games. *J Environ Sci* 2012; **24**(1): 50-61.
119. Wang T, Nie W, Gao J, et al. Air quality during the 2008 Beijing Olympics: secondary pollutants and regional impact. *Atmos Chem Phys* 2010; **10**(16): 7603-15.
120. Chou CCK, Tsai CY, Chang CC, Lin PH, Liu SC, Zhu T. Photochemical production of ozone in Beijing during the 2008 Olympic Games. *Atmos Chem Phys* 2011; **11**(18): 9825-37.

121. Sun Y, Wang L, Wang Y, Quan L, Zirui L. In situ measurements of SO<sub>2</sub>, NO<sub>x</sub>, NO<sub>y</sub>, and O<sub>3</sub> in Beijing, China during August 2008. *Sci Total Environ* 2011; **409**(5): 933-40.
122. Yang JB, Liu JL, Han SQ, Yao Q, Cai ZY. Study of the meteorological influence on ozone in urban areas and their use in assessing ozone trends in all seasons from 2009 to 2015 in Tianjin, China. *Meteorol Atmos Phys* 2019; **131**(6): 1661-75.
123. Han SQ, Zhang M, Zhao CS, et al. Differences in ozone photochemical characteristics between the megacity Tianjin and its rural surroundings. *Atmos Environ* 2013; **79**: 209-16.
124. Wei W, Lv Z, Cheng S, et al. Characterizing ozone pollution in a petrochemical industrial area in Beijing, China: a case study using a chemical reaction model. *Environ Monit Assess* 2015; **187**(6): 377.
125. Guo H, Wang DW, Cheung K, Ling ZH, Chan CK, Yao XH. Observation of aerosol size distribution and new particle formation at a mountain site in subtropical Hong Kong. *Atmos Chem Phys* 2012; **12**(20): 9923-39.
126. Yin XF, Kang SC, de Foy B, et al. Surface ozone at Nam Co in the inland Tibetan Plateau: variation, synthesis comparison and regional representativeness. *Atmos Chem Phys* 2017; **17**(18): 11293-311.
127. Gao J, Zhu B, Xiao H, et al. Diurnal variations and source apportionment of ozone at the summit of Mount Huang, a rural site in Eastern China. *Environ Pollut* 2017; **222**: 513-22.
128. Ding AJ, Fu CB, Yang XQ, et al. Ozone and fine particle in the western Yangtze River Delta: an overview of 1 yr data at the SORPES station. *Atmos Chem Phys* 2013; **13**(11): 5813-30.
129. Lyu XP, Chen N, Guo H, et al. Ambient volatile organic compounds and their effect on ozone production in Wuhan, central China. *Sci Total Environ* 2016; **541**: 200-9.
130. An J, Zou J, Wang J, Lin X, Zhu B. Differences in ozone photochemical characteristics between the megacity Nanjing and its suburban surroundings, Yangtze River Delta, China. *Environ Sci Pollut Res Int* 2015; **22**(24): 19607-17.
131. Jia CH, Mao XX, Huang T, et al. Non-methane hydrocarbons (NMHCs) and their contribution to ozone formation potential in a petrochemical industrialized city, Northwest China. *Atmos Res* 2016; **169**: 225-36.
132. Li K, Chen LH, Ying F, et al. Meteorological and chemical impacts on ozone formation: A case study in Hangzhou, China. *Atmos Res* 2017; **196**: 40-52.
133. Shi CZ, Wang SS, Liu R, et al. A study of aerosol optical properties during ozone pollution episodes in 2013 over Shanghai, China. *Atmos Res* 2015; **153**: 235-49.
134. Wang T, Tham YJ, Xue LK, et al. Observations of nitril chloride and modeling its source and effect on ozone in the planetary boundary layer of southern China. *J Geophys Res-Atmos* 2016; **121**(5): 2476-89.
135. Gong C, Liao H. A typical weather pattern for ozone pollution events in North China. *Atmos Chem Phys* 2019; **19**(22): 13725-40.
136. Tong L, Zhang HL, Yu J, et al. Characteristics of surface ozone and nitrogen oxides at urban, suburban and rural sites in Ningbo, China. *Atmos Res* 2017; **187**: 57-68.
137. Hayashida S, Kajino M, Deushi M, Sekiyama TT, Liu X. Seasonality of the lower tropospheric ozone over China observed by the Ozone Monitoring Instrument. *Atmos Environ* 2018; **184**: 244-53.
138. Wang HQ, Mamtimin M, Chen F. Some characteristics of ozone concentrations and their linkages with meteorological factors in Kashgar, northwestern China. *Iop C Ser Earth Env* 2017; **74**(1): 012001.
139. Wang M, Chen W, Zhang L, et al. Ozone pollution characteristics and sensitivity analysis using an observation-based model in Nanjing, Yangtze River Delta Region of China. *J Environ Sci* 2020; **93**: 13-22.
140. Zhang K, Zhou L, Fu QY, et al. Vertical distribution of ozone over Shanghai during late spring: A balloon-borne observation. *Atmos Environ* 2019; **208**: 48-60.
141. Li P, Wang L, Guo P, et al. High reduction of ozone and particulate matter during the 2016 G-20 summit in Hangzhou by forced emission controls of industry and traffic. *Environ Chem Lett* 2017; **15**(4): 709-15.
142. Chen Q, Wang D, Li X, et al. Vertical Characteristics of Winter Ozone Distribution within the Boundary Layer in Shanghai Based on Hexacopter Unmanned Aerial Vehicle Platform. *Sustainability* 2019; **11**(24): 7026.
143. Zhang G, Jing S, Xu W, et al. Simultaneous observation of atmospheric peroxyacetyl nitrate and ozone in the megacity of Shanghai, China: Regional transport and thermal decomposition. *Environ Pollut* 2021; **274**: 116570.
144. He Z, Zhang X, Li YF, et al. Characterizing carbonyl compounds and their sources in Fuzhou ambient air, southeast of China. *PeerJ* 2020; **8**: e10227.
145. Yu D, Tan ZF, Lu KD, et al. An explicit study of local ozone budget and NO<sub>x</sub>-VOCs sensitivity in Shenzhen China. *Atmos Environ* 2020; **224**: 117304.
146. Zhu J, Wang SS, Wang HL, et al. Observationally constrained modeling of atmospheric oxidation capacity and photochemical reactivity in Shanghai, China. *Atmos Chem Phys* 2020; **20**(3): 1217-32.
